# Supplementary material for: Independent regulation of mitochondrial DNA quantity and quality in Caenorhabditis elegans primordial germ cells
Source: eLife journal article supplement (doi:10.7554/elife.80396), 2022-09-16
Supplement: fig1-figsupp2-data1 [file elife-80396-fig1-figsupp2-data1-v1.xlsx]

## Sheet: TFAM-mito Coloc
TFAM-GFP colocalization with mito-mCh-PGC
Adult Distal germline:
2022-03-07		2022-03-08		2022-03-09
TFAM that overlaps with mito-mcherry		TFAM that overlaps with mito-mcherry		TFAM that overlaps with mito-mcherry
0.895		0.91		0.93
0.91		0.91		0.89
0.91		0.9		0.82
0.94		0.87		0.86
0.89		0.87		0.94
0.85		0.92		0.86
0.81		0.89		0.92
0.87		0.83		0.91
0.92		0.87		0.9
0.88		0.93		0.87
0.93		0.85		0.92
0.86		0.97		0.93
0.94		0.93		0.88
0.89		0.84		0.94
0.82		0.94		0.9
0.94		0.85		0.88
0.85		0.91		0.89
0.91		0.88		0.89
0.93		0.91		0.75
		0.88
		0.89
		0.9
		0.91
		0.89
		0.91
Mean 1:		Mean 2:		Mean 3:
0.891842		0.8944		0.888421
Descriptive Statistics:
	Fration of TFAM overlap with mitochondria
Mean	0.8916
Std. Deviation	0.003
Std. Error of Mean	0.001732

## Sheet: whole embryo mtDNAs
	WT whole embryo mtDNAs:								unpaired two-tailed t-test:	Whole embryo mtDNAs
	exp1	exp2	exp3
	2021-04-13	2021-04-14	2021-04-15						Column B	TFAM-GFP
	26666.7	29083.3	36000						vs.	vs.
	41583.3	38583.3	30250						Column A	WT
	31500	41666.7	31000
	30250	40166.7	29333.3		Descriptive statistics:				Unpaired t test
					Mean	33875			P value	0.0002
	Mean 1:	Mean 2:	Mean 3:		Std. Deviation	3150			P value summary	***
	32500	37375	31645.8		Std. Error of Mean	1819			Significantly different (P < 0.05)?	Yes
									One- or two-tailed P value?	Two-tailed
									t, df	t=13.04, df=4
	TFAM-GFP whole embryo mtDNAs:
	exp1	exp2	exp3						How big is the difference?
	2021-09-15	2021-09-16	2021-09-17						Mean of column A	33875
	7666.67	8275	13633.3						Mean of column B	8630
	5725	7541.67	8466.67						Difference between means (B - A) ± SEM	-25245 ± 1936
	9650	10241.7	7141.67						95% confidence interval	-30619 to -19871
	6783.33	5675	10600		Descriptive statistics:				R squared (eta squared)	0.977
					Mean	8630
	Mean 1:	Mean 2:	Mean 3:		Std. Deviation	1147			F test to compare variances
	7456.25	7933.33	9960.42		Std. Error of Mean	661.9			F, DFn, Dfd	7.550, 2, 2
									P value	0.2339
									P value summary	ns
									Significantly different (P < 0.05)?	No
									Data analyzed
									Sample size, column A	3
									Sample size, column B	3
