# Supplementary material for: Independent regulation of mitochondrial DNA quantity and quality in Caenorhabditis elegans primordial germ cells
Source: eLife journal article supplement (doi:10.7554/elife.80396), 2022-09-16
Supplement: fig2-data1 [file elife-80396-fig2-data1-v1.xlsx]

## Sheet: PGC mtDNAs
PGC mtDNAs
WT PGC mtDNAs:
	EMB PGCs				Late emb PGCs				L1 PGCs								Two-way unpaired t-test:	WT emb vs L1 PGC mtDNAs		unpaired two-tailed t-test:	WT emb vs late emb PGC mtDNAs				Two-way unpaired t-test:	WT emb vs L1 PGC mtDNAs
2020-09-24	2020-09-28	2020-10-02		2022-07-08	2022-07-14	2022-07-15		2020-09-22	2020-09-25	2020-09-29
423.478	385.223	464.132		269.565	256.842	218.596		247.568	238.929	218.252							Column B	L1 PGC		Column B	late emb PGC				Column C	L1 PGC
395.804	355.503	401.778		280	295.51	247.839		194.571	228.475	188.814							vs.	vs.		vs.	vs.				vs.	vs.
398.865	402.703	384.638		302	273.962	303.133		204.545	261.154	204		Descriptive statistics:					Column A	emb PGC		Column A	emb PGC				Column B	late emb PGC
													emb PGC	Late emb PGC	L1 PGC
												Mean	401.3	271.9	220.7		Unpaired t test			Unpaired t test					Unpaired t test
Mean 1:	Mean 2:	Mean 3:		Mean 1:	Mean 2:	Mean 3:		Mean 1:	Mean 2:	Mean 3:		Std. Deviation	18.31	14	20.08		P value	0.0003		P value	0.0006				P value	0.0222
406.049	381.143	416.849		283.855	275.438	256.523		215.561	242.852	203.689		Std. Error of Mean	10.57	8.082	11.59		P value summary	***		P value summary	***				P value summary	*
																	Significantly different (P < 0.05)?	Yes		Significantly different (P < 0.05)?	Yes				Significantly different (P < 0.05)?	Yes
																	One- or two-tailed P value?	Two-tailed		One- or two-tailed P value?	Two-tailed				One- or two-tailed P value?	Two-tailed
nop-1 PGC mtDNAs:																	t, df	t=11.51, df=4		t, df	t=9.724, df=4				t, df	t=3.625, df=4
	EMB PGCs				L1 PGCs
2021-01-21	2021-01-25	2021-02-08		2021-02-03	2021-02-11	2021-02-18											How big is the difference?			How big is the difference?					How big is the difference?
348.889	344	363.158		362.927	302.564	298.75											Mean of column B	401.3		Mean of column A	401.3				Mean of column B	271.9
315.238	351.837	393.143		356.098	257.391	251.579											Mean of column C	220.7		Mean of column B	271.9				Mean of column C	220.7
344.211	334.468	343		328	349.714	256.667		Descriptive statistics:									Difference between means (C - B) ± SEM	-180.6 ± 15.69		Difference between means (B - A) ± SEM	-129.4 ± 13.31				Difference between means (C - B) ± SEM	-51.24 ± 14.13
									emb PGC	L1 PGC							95% confidence interval	-224.2 to -137.1		95% confidence interval	-166.4 to -92.46				95% confidence interval	-90.48 to -12.00
								Mean	94.07	56.13							R squared (eta squared)	0.9707		R squared (eta squared)	0.9594				R squared (eta squared)	0.7667
Mean 1:	Mean 2:	Mean 3:		Mean 1:	Mean 2:	Mean 3:		Std. Deviation	9.156	3.333
336.113	343.435	366.434		349.008	303.223	268.999		Std. Error of Mean	5.286	1.924							F test to compare variances			F test to compare variances					F test to compare variances
																	F, DFn, Dfd	1.203, 2, 2		F, DFn, Dfd	1.711, 2, 2				F, DFn, Dfd	2.058, 2, 2
																	P value	0.908		P value	0.7377				P value	0.654
TFAM-GFP PGC mtDNAs:																	P value summary	ns		P value summary	ns				P value summary	ns
	EMB PGCs				L1 PGCs												Significantly different (P < 0.05)?	No		Significantly different (P < 0.05)?	No				Significantly different (P < 0.05)?	No
2020-11-09	2020-11-10	2020-11-12		2020-10-27	2020-10-30	2020-11-06
83.5165	102.632	105.934		50.9375	52.8696	60.3226											Data analyzed			Data analyzed					Data analyzed
88.2759	95.8974	92.9524		53.5484	58.1017	59.1475											Sample size, column B	3		Sample size, column A	3				Sample size, column B	3
78.6957	73.0612	82.3333		55	46.7027	53.0588		Descriptive statistics:									Sample size, column C	3		Sample size, column B	3				Sample size, column C	3
									emb PGC	L1 PGC
								Mean	348.7	307.1
Mean 1:	Mean 2:	Mean 3:		Mean 1:	Mean 2:	Mean 3:		Std. Deviation	15.82	40.14
83.496	90.5301	93.7399		53.162	52.558	57.5096		Std. Error of Mean	9.135	23.18
nop-1; atg-18 PGC mtDNAs:																	unpaired two-tailed t-test:	TFAM-GFP emb vs L1 PGC mtDNAs		unpaired two-tailed t-test:	nop-1 emb vs L1 PGC mtDNAs
	EMB PGCs				L1 PGCs
2022-05-16	2022-05-19	2022-05-23		2022-05-17	2022-05-20	2022-05-24											Column B	TFAM-GFP L1 PGC		Column B	nop-1 L1 PGC
373.659	406.667	390.303		486.4	574.118	396.818											vs.	vs.		vs.	vs.
413.333	317.838	316		370	350.588	528.824											Column A	TFAM-GFP emb PGC		Column A	nop-1 emb PGC
424	283.81	389.091		392.258	360	288		Descriptive statistics:
									emb PGC	L1 PGC							Unpaired t test			Unpaired t test
								Mean	368.3	416.3							P value	0.0025		P value	0.1704
Mean 1:	Mean 2:	Mean 3:		Mean 1:	Mean 2:	Mean 3:		Std. Deviation	33.89	11.84							P value summary	**		P value summary	ns
403.664	336.105	365.131		416.219	428.235	404.547		Std. Error of Mean	19.57	6.838							Significantly different (P < 0.05)?	Yes		Significantly different (P < 0.05)?	No
																	One- or two-tailed P value?	Two-tailed		One- or two-tailed P value?	Two-tailed
																	t, df	t=6.744, df=4		t, df	t=1.669, df=4
																	How big is the difference?			How big is the difference?
																	Mean of column A	94.07		Mean of column A	348.7
																	Mean of column B	56.13		Mean of column B	307.1
																	Difference between means (B - A) ± SEM	-37.94 ± 5.626		Difference between means (B - A) ± SEM	-41.58 ± 24.91
																	95% confidence interval	-53.56 to -22.32		95% confidence interval	-110.8 to 27.58
																	R squared (eta squared)	0.9192		R squared (eta squared)	0.4106
																	F test to compare variances			F test to compare variances
																	F, DFn, Dfd	7.545, 2, 2		F, DFn, Dfd	6.438, 2, 2
																	P value	0.234		P value	0.2689
																	P value summary	ns		P value summary	ns
																	Significantly different (P < 0.05)?	No		Significantly different (P < 0.05)?	No
																	Data analyzed			Data analyzed
																	Sample size, column A	3		Sample size, column A	3
																	Sample size, column B	3		Sample size, column B	3
																	unpaired one tailed t-test:
																	Column B	nop-1; atg-18 L1 PGCs
																	vs.	vs.
																	Column A	nop-1; atg-18 emb PGCs
																	Unpaired t test with Welch's correction
																	P value	0.0608
																	P value summary	ns
																	Significantly different (P < 0.05)?	No
																	One- or two-tailed P value?	One-tailed
																	Welch-corrected t, df	t=2.317, df=2.481
																	How big is the difference?
																	Mean of column C	368.3
																	Mean of column D	416.3
																	Difference between means (D - C) ± SEM	48.03 ± 20.73
																	95% confidence interval	-26.46 to 122.5
																	R squared (eta squared)	0.684
																	F test to compare variances
																	F, DFn, Dfd	8.187, 2, 2
																	P value	0.2177
																	P value summary	ns
																	Significantly different (P < 0.05)?	No
																	Data analyzed
																	Sample size, column C	3
																	Sample size, column D	3

## Sheet: Proportion mtDNA inherited
	WT proportion mtDNAs:								unpaired two-tailed t-test:	Proportion mtDNA inherited		unpaired two-tailed t-test:	Proportion mtDNA inherited
	exp1	exp2	exp3						Column B	TFAM-GFP proprotion		Column B	nop-1 proportion
	0.584605	0.620235	0.470238						vs.	vs.		vs.	vs.
	0.491585	0.64268	0.469945						Column A	WT proportion		Column A	WT proportion
	0.512818	0.648503	0.530369
					Descriptive statistics:				Unpaired t test			Unpaired t test
					Mean	0.5523			P value	0.2547		P value	0.0269
	Mean 1:	Mean 2:	Mean 3:		Std. Deviation	0.07605			P value summary	ns		P value summary	*
	0.52967	0.637139	0.490184		Std. Error of Mean	0.04391			Significantly different (P < 0.05)?	No		Significantly different (P < 0.05)?	Yes
									One- or two-tailed P value?	Two-tailed		One- or two-tailed P value?	Two-tailed
									t, df	t=1.329, df=4		t, df	t=3.416, df=4
	TFAM-GFP proportion mtDNAs:								How big is the difference?			How big is the difference?
									Mean of column A	0.5523		Mean of column A	0.5522
	exp1	exp2	exp3						Mean of column B	0.614		Mean of column B	0.8878
	0.60991	0.515139	0.569435						Difference between means (B - A) ± SEM	0.06165 ± 0.04640		Difference between means (B - A) ± SEM	0.3356 ± 0.09825
	0.606603	0.605873	0.636321						95% confidence interval	-0.06717 to 0.1905		95% confidence interval	0.06280 to 0.6084
	0.698895	0.639227	0.644439						R squared (eta squared)	0.3062		R squared (eta squared)	0.7447
					Descriptive statistics:
					Mean	0.614			F test to compare variances			F test to compare variances
	Mean 1:	Mean 2:	Mean 3:		Std. Deviation	0.02597			F, DFn, Dfd	8.576, 2, 2		F, DFn, Dfd	3.944, 2, 2
	0.638469	0.586747	0.616732		Std. Error of Mean	0.01499			P value	0.2089		P value	0.4045
									P value summary	ns		P value summary	ns
									Significantly different (P < 0.05)?	No		Significantly different (P < 0.05)?	No
	nop-1 proportion mtDNAs:								Data analyzed			Data analyzed
									Sample size, column A	3		Sample size, column A	3
	exp1	exp2	exp3						Sample size, column B	3		Sample size, column B	3
	1.04024	0.879547	0.822645
	1.12961	0.731565	0.639917
	0.952905	1.04558	0.748299
					Descriptive statistics:				unpaired two-tailed t-test:	Proportion mtDNA inherited		Unpaired two-tailed t-test:
					Mean	0.8878
	Mean 1:	Mean 2:	Mean 3:		Std. Deviation	0.152			Column C	TFAM-GFP proprotion		Column B	nop-1; atg-18
	1.04092	0.885565	0.736954		Std. Error of Mean	0.08775			vs.	vs.		vs.	vs.
									Column B	nop-1 proportion		Column A	WT
									Unpaired t test			Unpaired t test
	nop-1; atg-18 proportion mtDNAs:								P value	0.0371		P value	0.0015
		EMB PGCs							P value summary	*		P value summary	**
	exp1	exp2	exp3						Significantly different (P < 0.05)?	Yes		Significantly different (P < 0.05)?	Yes
	1.30172	1.41176	1.01669						One- or two-tailed P value?	Two-tailed		One- or two-tailed P value?	Two-tailed
	0.895161	1.10304	1.67349						t, df	t=3.076, df=4		t, df	t=7.706, df=4
	0.925137	1.26846	0.740187
					Descriptive statistics:				How big is the difference?			How big is the difference?
					Mean	1.148			Mean of column B	0.8878		Mean of column A	0.5523
	Mean 1:	Mean 2:	Mean 3:		Std. Deviation	0.1103			Mean of column C	0.614		Mean of column B	1.148
	1.04067	1.26109	1.14346		Std. Error of Mean	0.06368			Difference between means (C - B) ± SEM	-0.2738 ± 0.08903		Difference between means (B - A) ± SEM	0.5961 ± 0.07735
									95% confidence interval	-0.5210 to -0.02665		95% confidence interval	0.3813 to 0.8108
									R squared (eta squared)	0.7028		R squared (eta squared)	0.9369
									F test to compare variances			F test to compare variances
									F, DFn, Dfd	34.25, 2, 2		F, DFn, Dfd	2.103, 2, 2
									P value	0.0567		P value	0.6445
									P value summary	ns		P value summary	ns
									Significantly different (P < 0.05)?	No		Significantly different (P < 0.05)?	No
									Data analyzed			Data analyzed
									Sample size, column B	3		Sample size, column A	3
									Sample size, column C	3		Sample size, column B	3
									unpaired two-tailed t-test:	Proportion mtDNA inherited		Unpaired one-tailed t-test:
									Column C	nop-1; atg-18 proprotion		Column B	nop-1; atg-18 proprotion
									vs.	vs.		vs.
									Column B	TFAM-GFP proprotion		Column A	nop-1 proportion
									Unpaired t test			Unpaired t test with Welch's correction
									P value	0.0012		P value	0.0401
									P value summary	**		P value summary	*
									Significantly different (P < 0.05)?	Yes		Significantly different (P < 0.05)?	Yes
									One- or two-tailed P value?	Two-tailed		One- or two-tailed P value?	One-tailed
									t, df	t=8.169, df=4		Welch-corrected t, df	t=2.404, df=3.649
									How big is the difference?			How big is the difference?
									Mean of column B	0.614		Mean of column C	0.8878
									Mean of column C	1.148		Mean of column D	1.148
									Difference between means (C - B) ± SEM	0.5344 ± 0.06542		Difference between means (D - C) ± SEM	0.2606 ± 0.1084
									95% confidence interval	0.3528 to 0.7161		95% confidence interval	-0.05221 to 0.5734
									R squared (eta squared)	0.9435		R squared (eta squared)	0.6129
									F test to compare variances			F test to compare variances
									F, DFn, Dfd	18.03, 2, 2		F, DFn, Dfd	1.899, 2, 2
									P value	0.1051		P value	0.6898
									P value summary	ns		P value summary	ns
									Significantly different (P < 0.05)?	No		Significantly different (P < 0.05)?	No
									Data analyzed			Data analyzed
									Sample size, column B	3		Sample size, column C	3
									Sample size, column C	3		Sample size, column D	3
