# Supplementary material for: Independent regulation of mitochondrial DNA quantity and quality in Caenorhabditis elegans primordial germ cells
Source: eLife. 2022 Oct 6;11:e80396. doi: 10.7554/eLife.80396 (PMC9536838; doi:10.7554/eLife.80396)
Supplement: Figure 1—source data 1. [file elife-80396-fig1-data1.xlsx]

## Sheet: Mito pH
Mito acidification in PGCs and lobe debris
CELL BODY:												LOBE DEBRIS:
2021-10-19				2021-10-26				2021-11-04				2021-10-19				2021-10-26				2021-11-04					Ratio paired t-test for significace:
Cell body:				Cell body:				Cell body:				Lobe debris:				Lobe debris:				Lobe debris:					Table Analyzed	mito pH measurements
Dendra intensity:	mCherry intensity:	G/R		Dendra intensity:	mCherry intensity:	G/R		Dendra intensity:	mCherry intensity:	G/R		Dendra intensity:	mCherry intensity:	G/R		Dendra intensity:	mCherry intensity:	G/R		Dendra intensity:	mCherry intensity:	G/R
15131	13667	1.10712		24624	19808	1.24313		27134	17644	1.53786		8044	32074	0.250795		5537	29017	0.190819		4479	15806	0.283373			Column B	Lobe debris
19866	17594	1.12913		23332	22169	1.05246		18280	19773	0.924493		6089	22621	0.269175		3951	12714	0.31076		6162	38340	0.16072			vs.	vs.
23132	14256	1.62262		13830	11864	1.16571		13842	14339	0.965339		3389	20063	0.168918		5686	18272	0.311187		2222	14197	0.156512			Column A	Cell body
14808	12057	1.22817		18552	13876	1.33698		22205	18677	1.1889		7011	31738	0.220902		6255	20898	0.299311		5149	24402	0.211007
34149	21830	1.56432		19277	19883	0.969522		12259	11436	1.07197		7551	38357	0.196861		2724	17461	0.156005		3822	16441	0.232468			Ratio paired t test
23684	14818	1.59833		13665	14455	0.945348		21601	18317	1.17929		6532	19801	0.329882		3812	23799	0.160175		2581	22731	0.113545			P value	0.0015
14409	11210	1.28537		15734	15626	1.00691		25749	14831	1.73616		6469	25245	0.256249		5416	26991	0.200659		7061	24743	0.285374			P value summary	**
19519	15481	1.26084		16017	18034	0.888156		21089	17741	1.18872		9417	28870	0.326186		4484	40109	0.111795		6574	17297	0.380066			Significantly different (P < 0.05)?	Yes
15313	10088	1.51794		20558	17901	1.14843		10770	8684	1.24021		6384	21905	0.29144		6152	24229	0.253911		5793	21121	0.274277			One- or two-tailed P value?	Two-tailed
16027	12695	1.26247		16635	12736	1.30614		12505	11456	1.09157		6014	23797	0.252721		6493	24858	0.261204		7101	20159	0.35225			t, df	t=25.81, df=2
18791	13486	1.39337		18634	15981	1.16601		14238	10576	1.34626		4470	11172	0.400107		2840	25243	0.112506		8477	17829	0.475461			Number of pairs	3
16379	10212	1.6039		11780	10429	1.12954		18571	11013	1.68628		11409	33993	0.335628		9018	27125	0.332461		9404	26933	0.349163
20215	12681	1.59412		22290	17384	1.28221		19419	13710	1.41641		9457	27088	0.349121		3893	16020	0.243009		12833	24462	0.52461			How big is the difference?
34205	22316	1.53276		17321	16244	1.0663		18781	14696	1.27797		11577	31275	0.370168		3815	18566	0.205483		8848	21692	0.407892			Geometric mean of ratios (B / A)	0.2116
19329	14524	1.33083						18218	13686	1.33114		3166	9014	0.351231						6340	17149	0.369701			SD of log(ratios)	0.04527
24758	20845	1.18772										3497	16710	0.209276											SEM of log(ratios)	0.02614
25255	16033	1.57519										4323	19913	0.217094											95% confidence interval	0.1633 to 0.2741
9833	13904	0.707207										2343	25631	0.0914127											R squared (partial eta squared)	0.997
13221	17743	0.745139										1995	18023	0.110692
																									How effective was the pairing?
																									Correlation coefficient (r)	0.7481
																									P value (one tailed)	0.231
		Mean 1:				Mean 2:				Mean 3:				Mean 1:				Mean 2:				Mean 3:			P value summary	ns
		1.32876				1.12192				1.27884				0.263045				0.224949				0.305095			Was the pairing significantly effective?	No
	Descriptive Statistics:												Descriptive Statistics:												Data analyzed
		Cell body												Lobe debris:											Sample size, column A	3
	Mean	1.243											Mean	0.2644											Sample size, column B	3
	Std. Deviation	0.1079											Std. Deviation	0.04009
	Std. Error of Mean	0.06232											Std. Error of Mean	0.02315

## Sheet: TFAM-GFP foci
EMBRYOS:											L1 Larva
2021-09-13			2021-09-14			2021-09-20					2021-09-21			2021-09-28			2021-09-29			Unpaired two-tailed t-test:
TFAM foci/ 2 PGCs	TFAM foci / single PGC		TFAM foci/ 2 PGCs	TFAM foci / single PGC		TFAM foci/ 2 PGCs	TFAM foci / single PGC				TFAM foci/ 2 PGCs	TFAM foci / single PGC		TFAM foci/ 2 PGCs	TFAM foci / single PGC		TFAM foci/ 2 PGCs	TFAM foci / single PGC		Table Analyzed	TFAM_quant Avgs
127	63.5		154	77		153	76.5				48	24		36	18		53	26.5
92	46		93	46.5		57	28.5				42	21		34	17		41	20.5		Column B	Data Set-B
61	30.5		85	42.5		123	61.5				37	18.5		53	26.5		67	33.5		vs.	vs.
84	42		90	45		74	37				43	21.5		55	27.5		44	22		Column A	Data Set-A
56	28		160	80		58	29				23	11.5		31	15.5		51	25.5
145	72.5		99	49.5		122	61				31	15.5		36	18		37	18.5		Unpaired t test
55	27.5		85	42.5		52	26				38	19		41	20.5		40	20		P value	0.0004
122	61		50	25		71	35.5				40	20		28	14		31	15.5		P value summary	***
101	50.5		58	29		75	37.5				65	32.5		31	15.5		32	16		Significantly different (P < 0.05)?	Yes
117	58.5		90	45		62	31				47	23.5		46	23		26	13		One- or two-tailed P value?	Two-tailed
109	54.5		104	52		125	62.5				27	13.5		34	17		34	17		t, df	t=10.78, df=4
144	72		74	37		119	59.5				46	23		36	18		29	14.5
183	91.5		165	82.5		107	53.5				29	14.5		39	19.5		40	20		How big is the difference?
109	54.5		50	25		100	50				40	20		20	10		46	23		Mean of column A	49.4
130	65		69	34.5		91	45.5				51	25.5		31	15.5		43	21.5		Mean of column B	19.2
82	41		84	42		126	63				29	14.5		32	16		29	14.5		Difference between means (B - A) ± SEM	-30.20 ± 2.801
173	86.5		50	25		81	40.5				38	19		33	16.5					95% confidence interval	-37.98 to -22.42
132	66					113	56.5				40	20		37	18.5					R squared (eta squared)	0.9667
86	43										53	26.5
82	41										16	8								F test to compare variances
110	55										43	21.5								F, DFn, Dfd	21.85, 2, 2
											28	14								P value	0.0875
																				P value summary	ns
																				Significantly different (P < 0.05)?	No
	Mean 1:			Mean 2:			Mean 3:					Mean 1:			Mean 2:			Mean 3:
	54.8			45.9			47.5					19.4			18.1			20.1		Data analyzed
																				Sample size, column A	3
																				Sample size, column B	3
	Descriptive Statistics:											Descriptive Statistics:
		Embryos											L1 larvae
	Mean	49.4										Mean	19.2
	Std. Deviation	4.744										Std. Deviation	1.015
	Std. Error of Mean	2.739										Std. Error of Mean	0.5859

## Sheet: Mitos in cell body 
	Mitochondria in PGC cell body
	1.5-fold embryos:												2-fold embryos:
		2022-02-21				2022-02-22				2022-03-01				2022-02-21				2022-02-22				2022-03-01				unpaired two-tailed t-test:
																										Table Analyzed	mitos in cell body
	cell	total	Cell / total		cell	total	Cell / total		cell	total	Cell / total		cell	total	Cell / total		cell	total	Cell / total		cell	total	Cell / total
	3.4	9.4	0.361702		2.2	10.2	0.215686		0.7	7.4	0.0945946		4.2	13.8	0.304348		5.8	12.7	0.456693		3.9	10.6	0.367925			Column B	2-fold
	3.1	9	0.344444		1	10	0.1		1.9	8.3	0.228916		4.4	15.4	0.285714		5.4	9.8	0.55102		3.2	7.8	0.410256			vs.	vs.
	1.7	8.4	0.202381		1.43	9.2	0.155435		1.9	11.5	0.165217		6.6	14	0.471429		1.9	9.4	0.202128		3.8	13.8	0.275362			Column A	1.5-fold
	1.4	8.2	0.170732		1.9	9.7	0.195876		2.1	7.8	0.269231		6.5	18.2	0.357143		2.2	7.9	0.278481		3.4	9.4	0.361702
	1.2	9.7	0.123711		2	11	0.181818		2.1	10.5	0.2		5.5	14.7	0.37415		3.3	6.7	0.492537		1.6	4.9	0.326531			Unpaired t test
	1.8	12.6	0.142857		2.9	13.8	0.210145		1.8	8.5	0.211765		8.2	16.9	0.485207		4.01	10.5	0.381905		4.7	8.5	0.552941			P value	<0.0001
	1.7	8.4	0.202381		1.6	6.7	0.238806		2.3	8.9	0.258427		3.3	12	0.275		3.9	10.2	0.382353		4.4	8.3	0.53012			P value summary	****
	0.6	9.1	0.0659341		1.6	10.6	0.150943		1	10	0.1		4.2	10.7	0.392523		4.1	13.7	0.29927		3.31	9.1	0.363736			Significantly different (P < 0.05)?	Yes
	0.8	5.2	0.153846		1.9	7.9	0.240506		0.7	5.5	0.127273		4.3	11.3	0.380531		3.3	10.4	0.317308		4.2	11.1	0.378378			One- or two-tailed P value?	Two-tailed
	0.9	6.8	0.132353		1.7	7.6	0.223684		2.1	9.1	0.230769		3.1	9.4	0.329787		3.9	9.7	0.402062		3.9	8.9	0.438202			t, df	t=16.02, df=4
	1.6	7.3	0.219178		3.5	10	0.35		0.9	8.2	0.109756		4.5	10	0.45		1.9	10.4	0.182692		4.2	9.7	0.43299
					2.3	6	0.383333		2.4	9.6	0.25		2.7	9.5	0.284211		2.7	8.4	0.321429							How big is the difference?
					2.6	10.5	0.247619		1.25	9.5	0.131579						4.5	12.8	0.351562							Mean of column A	0.1898
					2	10.8	0.185185		2.4	10.2	0.235294						3.5	9.3	0.376344							Mean of column B	0.3801
					0.7	11.2	0.0625		1.6	8.4	0.190476						5.2	12.8	0.40625							Difference between means (B - A) ± SEM	0.1904 ± 0.01188
					2.1	11	0.190909										3.7	12.8	0.289062							95% confidence interval	0.1574 to 0.2234
					0.5	10	0.05										4.7	10.8	0.435185							R squared (eta squared)	0.9847
					1.6	10.6	0.150943										3.6	10.5	0.342857
					1	14	0.0714286										6.2	11.5	0.53913							F test to compare variances
																	4.2	10.14	0.414201							F, DFn, Dfd	49.39, 2, 2
																										P value	0.0397
																										P value summary	*
			Mean 1:				Mean 2:				Mean 3:				Mean 1:				Mean 2:				Mean 3:			Significantly different (P < 0.05)?	Yes
			0.192684				0.189727				0.186886				0.365837				0.371124				0.403468
																										Data analyzed
		Descriptive Statistics:												Descriptive Statistics:												Sample size, column A	3
			1.5-fold												2-fold											Sample size, column B	3
		Mean	0.1898											Mean	0.3801
		Std. Deviation	0.002899											Std. Deviation	0.02037
		Std. Error of Mean	0.001674											Std. Error of Mean	0.01176
