# Supplementary material for: Independent regulation of mitochondrial DNA quantity and quality in Caenorhabditis elegans primordial germ cells
Source: eLife. 2022 Oct 6;11:e80396. doi: 10.7554/eLife.80396 (PMC9536838; doi:10.7554/eLife.80396)
Supplement: Figure 2—figure supplement 2—source data 1. [file elife-80396-fig2-figsupp2-data1.xlsx]

## Sheet: Sorted PGC volume stats
	Sorted emb PGC volume						Sorted L1 PGC diameter					Unpaired Two tailed t-test:
	exp1	exp2	exp3				exp1	exp2	exp3			Column C	L1 PGC volume
	2020-11-16	2020-11-19	2020-12-01				2020-11-06	2020-11-24	2020-12-04			vs.	vs.
	397.437	120.491	356.818				2020-11-06	2020-11-24	2020-12-04			Column A	emb PGC volume
	156.003	255.712	236.627				114.061	66.3176	100.166
	137.838	309.343	182.924				69.2111	89.5112	59.3656			Unpaired t test
	156.283	129.31	285.853				50.965	47.1742	86.214			P value	<0.0001
	131.549	212.003	242.879				91.8046	122.448	71.9362			P value summary	****
	235.611	244.199	210.032				79.2384	77.4235	45.8298			Significantly different (P < 0.05)?	Yes
	265.777	246.759	105.904				84.2473	47.4589	31.8302			One- or two-tailed P value?	Two-tailed
	301.774	261.7	102.902				47.9679	79.283	63.3521			t, df	t=48.83, df=4
	173.357	225.609	157.973				58.1958	53.6362	76.1567
	106.121	471.108	212.003				83.6909	40.4503	143.131			How big is the difference?
	202.769	274.364	320.082				100.166	54.431	68.8449			Mean of column A	205
	281.158	124.487	245.334				86.4029	91.8046	67.9552			Mean of column B	72.82
	149.781	194.7	289.224				62.8539	74.4321	89.7049			Difference between means (B - A) ± SEM	-132.2 ± 2.706
	106.392	178.059	111.297				47.8403	49.6797	63.5829			95% confidence interval	-139.7 to -124.6
	135.337	301.883	66.6748				61.7141	48.8996	82.0821			R squared (eta squared)	0.9983
	274.058	281.885	291.876				59.5866	40.8505	68.642
	217.028	258.94	190.988				49.7778	90.5799	73.6222			F test to compare variances
	346.339	151.699	329.68				41.8626	88.8837	100.688			F, DFn, Dfd	1.403, 2, 2
	173.357	176.838	256.98				86.3085	101.107	68.7231			P value	0.8324
	160.174	186.611	91.3625				60.3646	118.613	65.4106			P value summary	ns
	171.111	130.364	151.424				53.2246	69.7423	78.8821			Significantly different (P < 0.05)?	No
	153.91	207.394	181.991				45.7369	45.6751	48.8349
	202.186	167.779	138.549				79.5958	66.0407	92.4458			Data analyzed
	206.886	163.332	104.449				63.8916	80.6293	66.7941			Sample size, column A	3
	189.309	134.574	246.854				65.9222	59.8822	100.688			Sample size, column B	3
	318.952	104.879	172.831				88.6912	62.8156	103.008
	201.188	176.762	153.91				73.1137	49.7778	80.5842
	187.085	116.063	230.392				45.4284	86.3557	78.8376
	207.818	280.328	291.238				53.2246	69.4151				Unpaired Two tailed t-test:
	291.344	176.685	173.959				88.547	60.8497
	224.804	217.465	228.579				58.7422	104.772				Column B	late emb PGC volume
	170.739	250.295	263.584				91.0685	85.8371				vs.	vs.
	143.462	319.743	199.284				92.5447	55.1636				Column A	emb PGC volume
	227.496	162.683					69.4151	58.5962
	128.631	124.969					82.9528	60.8497				Unpaired t test
	141.68	179.671					67.4731	62.9686				P value	<0.0001
	153.91	103.274					77.9518	46.765				P value summary	****
	199.284	240.814					43.3073	68.7231				Significantly different (P < 0.05)?	Yes
	202.019	242.879					56.7554	82.9528				One- or two-tailed P value?	Two-tailed
	208.243	160.031					73.5373	104.342				t, df	t=47.94, df=4
	235.426						62.2822	98.2483
	153.355						65.4106	81.3081				How big is the difference?
	330.72						46.765	65.8039				Mean of column A	205
	219.043						89.4145	39.1258				Mean of column B	73.07
	156.564						90.4824	77.2918				Difference between means (B - A) ± SEM	-131.9 ± 2.751
	200.028						112.195	51.7669				95% confidence interval	-139.5 to -124.3
	143.793						107.755	59.5129				R squared (eta squared)	0.9983
	236.812						45.6751
	158.894			Descriptive statistics			61.8653			Descriptive statistics		F test to compare variances
				Mean	205		62.8539			Mean	72.82	F, DFn, Dfd	1.484, 2, 2
	Mean 1:	Mean 2:	Mean 3:	Std. Deviation	3.024		53.6362			Std. Deviation	3.581	P value	0.8052
	201.486	206.642	206.802	Std. Error of Mean	1.746		122.448			Std. Error of Mean	2.068	P value summary	ns
												Significantly different (P < 0.05)?	No
							Mean 1:	Mean 2:	Mean 3:
							71.1405	70.3956	76.9375			Data analyzed
												Sample size, column A	3
												Sample size, column B	3
	Sorted emb PGC volume											Unpaired Two tailed t-test:
	exp1	exp2	exp3									Column C	L1 PGC volume
	2022-07-08	2022-07-14	2022-07-18									vs.	vs.
	88.6912	88.547	67.393									Column B	emb PGC volume
	50.1057	67.353	60.4763
	53.9118	92.2482	47.269									Unpaired t test
	72.9025	81.0814	90.9706									P value	0.9375
	93.3883	55.7614	48.5769									P value summary	ns
	95.646	67.6335	104.342									Significantly different (P < 0.05)?	No
	92.7427	60.8497	67.393									One- or two-tailed P value?	Two-tailed
	67.153	79.5958	71.7691									t, df	t=0.08346, df=4
	63.5059	111.13	58.1958
	49.2236	74.3466	47.2058									How big is the difference?
	53.6706	49.7778	60.4763									Mean of column A	73.07
	67.153	64.9407	49.9416									Mean of column B	72.82
	61.9031	62.7393	82.4022									Difference between means (B - A) ± SEM	-0.2476 ± 2.966
	90.7263	83.1369	102.584									95% confidence interval	-8.483 to 7.988
	63.9689	83.183	51.4652									R squared (eta squared)	0.001739
	74.9467	59.7713	150.601
	143.263	74.732	134.955									F test to compare variances
	89.996	61.8653	91.5097									F, DFn, Dfd	1.058, 2, 2
	78.8821	59.292	60.5882									P value	0.9719
	110.182	65.8039	71.9362									P value summary	ns
	59.8082	91.3134	66.7145									Significantly different (P < 0.05)?	No
	97.0179	80.0441	70.1117
	65.7251	85.4612	66.1197									Data analyzed
	82.8609	70.6062	69.5785									Sample size, column A	3
	77.5554	65.1753	82.0364									Sample size, column B	3
	110.516	57.942	92.5447
	74.0477	61.3749	55.5499
	76.4177	96.61	53.0195
	60.1788	71.7273	77.5554
	56.3991	92.0016	66.1197
	102.16	66.4762	78.4382
	73.1982	89.9474	68.9261
	73.1559	47.8722	50.1057
	70.3586	71.2276	80.4039
	77.1165	62.0546	39.2933
	86.3085	66.7941	84.3867
	49.6797	43.5164	55.0235
	67.6335	67.4731	90.6287
	65.1753	50.1057	44.6022
	66.6748	87.7807	76.4177
	120.609	48.9966	49.0938
	80.7196	70.1117	49.029
	71.4355	71.2691	71.5605
	75.5933	59.5498	43.7862
		46.0469	87.6852
		107.646	67.8344
		80.5842	79.6853
		53.0195
		67.8747		Descriptive statistics
				Mean	73.07
	Mean 1:	Mean 2:	Mean 3:	Std. Deviation	3.684
	77.3252	70.9059	70.9851	Std. Error of Mean	2.127

## Sheet: diameter to volume calc
	Sorted emb PGC diameter			Sorted emb PGC volume				Sorted L1 PGC diameter			Sorted L1 PGC volume
	exp1	exp2	exp3	exp1	exp2	exp3		exp1	exp2	exp3	exp1	exp2	exp3
	2020-11-16	2020-11-19	2020-12-01	2020-11-16	2020-11-19	2020-12-01		2020-11-06	2020-11-24	2020-12-04	2020-11-06	2020-11-24	2020-12-04
	9.122	6.128	8.8	397.437	120.491	356.818		6.017	5.022	5.762	114.061	66.3176	100.166
	6.679	7.875	7.674	156.003	255.712	236.627		5.094	5.55	4.84	69.2111	89.5112	59.3656
	6.409	8.391	7.043	137.838	309.343	182.924		4.6	4.483	5.481	50.965	47.1742	86.214
	6.683	6.274	8.173	156.283	129.31	285.853		5.597	6.161	5.16	91.8046	122.448	71.9362
	6.31	7.398	7.741	131.549	212.003	242.879		5.329	5.288	4.44	79.2384	77.4235	45.8298
	7.663	7.755	7.375	235.611	244.199	210.032		5.439	4.492	3.932	84.2473	47.4589	31.8302
	7.977	7.782	5.87	265.777	246.759	105.904		4.508	5.33	4.946	47.9679	79.283	63.3521
	8.322	7.936	5.814	301.774	261.7	102.902		4.808	4.679	5.259	58.1958	53.6362	76.1567
	6.918	7.553	6.707	173.357	225.609	157.973		5.427	4.259	6.49	83.6909	40.4503	143.131
	5.874	9.654	7.398	106.121	471.108	212.003		5.762	4.702	5.085	100.166	54.431	68.8449
	7.289	8.062	8.487	202.769	274.364	320.082		5.485	5.597	5.063	86.4029	91.8046	67.9552
	8.128	6.195	7.767	281.158	124.487	245.334		4.933	5.219	5.554	62.8539	74.4321	89.7049
	6.589	7.191	8.205	149.781	194.7	289.224		4.504	4.561	4.952	47.8403	49.6797	63.5829
	5.879	6.98	5.968	106.392	178.059	111.297		4.903	4.537	5.392	61.7141	48.8996	82.0821
	6.37	8.323	5.031	135.337	301.883	66.6748		4.846	4.273	5.08	59.5866	40.8505	68.642
	8.059	8.135	8.23	274.058	281.885	291.876		4.564	5.572	5.2	49.7778	90.5799	73.6222
	7.456	7.908	7.145	217.028	258.94	190.988		4.308	5.537	5.772	41.8626	88.8837	100.688
	8.713	6.617	8.571	346.339	151.699	329.68		5.483	5.78	5.082	86.3085	101.107	68.7231
	6.918	6.964	7.888	173.357	176.838	256.98		4.867	6.096	4.999	60.3646	118.613	65.4106
	6.738	7.09	5.588	160.174	186.611	91.3625		4.667	5.107	5.321	53.2246	69.7423	78.8821
	6.888	6.291	6.613	171.111	130.364	151.424		4.437	4.435	4.535	45.7369	45.6751	48.8349
	6.649	7.344	7.031	153.91	207.394	181.991		5.337	5.015	5.61	79.5958	66.0407	92.4458
	7.282	6.843	6.42	202.186	167.779	138.549		4.96	5.36	5.034	63.8916	80.6293	66.7941
	7.338	6.782	5.843	206.886	163.332	104.449		5.012	4.854	5.772	65.9222	59.8822	100.688
	7.124	6.358	7.783	189.309	134.574	246.854		5.533	4.932	5.816	88.6912	62.8156	103.008
	8.477	5.851	6.911	318.952	104.879	172.831		5.188	4.564	5.359	73.1137	49.7778	80.5842
	7.27	6.963	6.649	201.188	176.762	153.91		4.427	5.484	5.32	45.4284	86.3557	78.8376
	7.096	6.052	7.606	187.085	116.063	230.392		4.667	5.099	5.099	53.2246	69.4151	69.4151
	7.349	8.12	8.224	207.818	280.328	291.238		5.53	4.88	4.88	88.547	60.8497	60.8497
	8.225	6.962	6.926	291.344	176.685	173.959		4.823	5.849	5.849	58.7422	104.772	104.772
	7.544	7.461	7.586	224.804	217.465	228.579		5.582	5.473	5.473	91.0685	85.8371	85.8371
	6.883	7.819	7.955	170.739	250.295	263.584		5.612	4.723	4.723	92.5447	55.1636	55.1636
	6.495	8.484	7.247	143.462	319.743	199.284		5.099	4.819	4.819	69.4151	58.5962	58.5962
	7.574	6.773		227.496	162.683			5.411	4.88	4.88	82.9528	60.8497	60.8497
	6.263	6.203		128.631	124.969			5.051	4.936	4.936	67.4731	62.9686	62.9686
	6.468	7.001		141.68	179.671			5.3	4.47	4.47	77.9518	46.765	46.765
	6.649	5.821		153.91	103.274			4.357	5.082	5.082	43.3073	68.7231	68.7231
	7.247	7.719		199.284	240.814			4.768	5.411	5.411	56.7554	82.9528	82.9528
	7.28	7.741		202.019	242.879			5.198	5.841	5.841	73.5373	104.342	104.342
	7.354	6.736		208.243	160.031			4.918	5.725	5.725	62.2822	98.2483	98.2483
	7.661			235.426				4.999	5.375	5.375	65.4106	81.3081	81.3081
	6.641			153.355				4.47	5.009	5.009	46.765	65.8039	65.8039
	8.58			330.72				5.548	4.212	4.212	89.4145	39.1258	39.1258
	7.479			219.043				5.57	5.285	5.285	90.4824	77.2918	77.2918
	6.687			156.564				5.984	4.624	4.624	112.195	51.7669	51.7669
	7.256			200.028				5.904	4.844	4.844	107.755	59.5129	59.5129
	6.5			143.793				4.435			45.6751
	7.676			236.812				4.907			61.8653
	6.72			158.894				4.933			62.8539
								4.679			53.6362
								6.161			122.448
	Sorted late emb PGC diameter			Sorted late emb PGC volume
	exp1	exp2	exp3	exp1	exp2	exp3
	2022-07-08	2022-07-14	2022-07-18	2022-07-08	2022-07-14	2022-07-18
	5.533	5.53	5.049	88.6912	88.547	67.393
	4.574	5.048	4.87	50.1057	67.353	60.4763
	4.687	5.606	4.486	53.9118	92.2482	47.269
	5.183	5.37	5.58	72.9025	81.0814	90.9706
	5.629	4.74	4.527	93.3883	55.7614	48.5769
	5.674	5.055	5.841	95.646	67.6335	104.342
	5.616	4.88	5.049	92.7427	60.8497	67.393
	5.043	5.337	5.156	67.153	79.5958	71.7691
	4.95	5.965	4.808	63.5059	111.13	58.1958
	4.547	5.217	4.484	49.2236	74.3466	47.2058
	4.68	4.564	4.87	53.6706	49.7778	60.4763
	5.043	4.987	4.569	67.153	64.9407	49.9416
	4.908	4.93	5.399	61.9031	62.7393	82.4022
	5.575	5.415	5.808	90.7263	83.1369	102.584
	4.962	5.416	4.615	63.9689	83.183	51.4652
	5.231	4.851	6.601	74.9467	59.7713	150.601
	6.492	5.226	6.364	143.263	74.732	134.955
	5.56	4.907	5.591	89.996	61.8653	91.5097
	5.321	4.838	4.873	78.8821	59.292	60.5882
	5.948	5.009	5.16	110.182	65.8039	71.9362
	4.852	5.587	5.032	59.8082	91.3134	66.7145
	5.701	5.347	5.116	97.0179	80.0441	70.1117
	5.007	5.465	5.017	65.7251	85.4612	66.1197
	5.409	5.128	5.103	82.8609	70.6062	69.5785
	5.291	4.993	5.391	77.5554	65.1753	82.0364
	5.954	4.801	5.612	110.516	57.942	92.5447
	5.21	4.894	4.734	74.0477	61.3749	55.5499
	5.265	5.693	4.661	76.4177	96.61	53.0195
	4.862	5.155	5.291	60.1788	71.7273	77.5554
	4.758	5.601	5.017	56.3991	92.0016	66.1197
	5.8	5.026	5.311	102.16	66.4762	78.4382
	5.19	5.559	5.087	73.1982	89.9474	68.9261
	5.189	4.505	4.574	73.1559	47.8722	50.1057
	5.122	5.143	5.355	70.3586	71.2276	80.4039
	5.281	4.912	4.218	77.1165	62.0546	39.2933
	5.483	5.034	5.442	86.3085	66.7941	84.3867
	4.561	4.364	4.719	49.6797	43.5164	55.0235
	5.055	5.051	5.573	67.6335	67.4731	90.6287
	4.993	4.574	4.4	65.1753	50.1057	44.6022
	5.031	5.514	5.265	66.6748	87.7807	76.4177
	6.13	4.54	4.543	120.609	48.9966	49.0938
	5.362	5.116	4.541	80.7196	70.1117	49.029
	5.148	5.144	5.151	71.4355	71.2691	71.5605
	5.246	4.845	4.373	75.5933	59.5498	43.7862
		4.447	5.512		46.0469	87.6852
		5.902	5.06		107.646	67.8344
		5.359	5.339		80.5842	79.6853
		4.661			53.0195
		5.061			67.8747
