# Supplementary material for: Independent regulation of mitochondrial DNA quantity and quality in Caenorhabditis elegans primordial germ cells
Source: eLife. 2022 Oct 6;11:e80396. doi: 10.7554/eLife.80396 (PMC9536838; doi:10.7554/eLife.80396)
Supplement: Figure 2—figure supplement 3—source data 1. [file elife-80396-fig2-figsupp3-data1.xlsx]

## Sheet: Whole emb volume
	2022-07-09					2022-07-30					2022-08-03
	Length	Width				Length	Width				Length	Width
	49.64	30.061				50.541	26.904				49.451	28.996
	51.155	29.363				52.862	33.014				52.533	28.34
	49.565	31.102				48.763	33.232				48.657	31.868
	48.274	26.863				50.767	29.048				51.153	31.084
	50.353	30.103				49.473	31.649				53.082	32.666
	48.096	31.502				51.749	31.059				49.482	28.555
	47.809	29.517				50.434	28.038				45.749	28.294
	47.97	31.159				47.838	31.52				45.637	28.169
	50.305	33.225				53.424	28.321				48.675	29.318
	48.669	32.691				51.831	30.422				51.086	31.991
	49.195	30.38				48.979	33.095				52.7	28.177
	48.587	29.265				50.566	27.943				48.619	30.001
	47.539	29.819				53.699	27.89				51.459	33.81
	48.399	30.426
	Length / 2	Width / 2	Volume	Average volume		Length / 2	Width / 2	Volume	Average volume		Length / 2	Width / 2	Volume	Average volume
	24.82	15.0305	23487.5	23747.7		25.2705	13.452	19154.7	24297.2		24.7255	14.498	21769.6	23802.8
	25.5775	14.6815	23093.4			26.431	16.507	30167.4			26.2665	14.17	22091.8
	24.7825	15.551	25104.4			24.3815	16.616	28196.9			24.3285	15.934	25873.4
	24.137	13.4315	18239.8			25.3835	14.524	22429.1			25.5765	15.542	25878.7
	25.1765	15.0515	23891.5			24.7365	15.8245	25947			26.541	16.333	29657.7
	24.048	15.751	24991			25.8745	15.5295	26138.2			24.741	14.2775	21125.6
	23.9045	14.7585	21809.8			25.217	14.019	20759.4			22.8745	14.147	19176.5
	23.985	15.5795	24385.7			23.919	15.76	24885.3			22.8185	14.0845	18960.9
	25.1525	16.6125	29076.3			26.712	14.1605	22436.3			24.3375	14.659	21906.5
	24.3345	16.3455	27233.7			25.9155	15.211	25116.7			25.543	15.9955	27375.1			Descriptive Statistics:
	24.5975	15.19	23773.6			24.4895	16.5475	28088.8			26.35	14.0885	21907.8				emb PGC volume
	24.2935	14.6325	21787.9			25.283	13.9715	20673			24.3095	15.0005	22912.7			Mean	23949
	23.7695	14.9095	22132.7			26.8495	13.945	21870.6			25.7295	16.905	30799.9			Std. Deviation	302.6
	24.1995	15.213	23459.8													Std. Error of Mean	174.7

## Sheet: emb PGC volume
	2021-07-09						2021-07-30						2021-08-03
	Volume / 2 PGCs	Avg Volume		Volume/PGC	Avg Vol/PGC		Volume / 2 PGCs	Avg Volume		Volume/PGC	Avg Vol/PGC		Volume / 2 PGCs	Avg Volume		Volume/PGC	Avg Vol/PGC
	604	557.667		302	278.833		677	569.267		338.5	284.633		513	521.538		256.5	260.769
	468			234			550			275			530			265
	598			299			514			257			428			214
	594			297			426			213			513			256.5
	529			264.5			564			282			591			295.5
	555			277.5			617			308.5			430			215
	485			242.5			574			287			544			272
	516			258			578			289			633			316.5
	498			249			424			212			525			262.5
	671			335.5			583			291.5			431			215.5
	573			286.5			653			326.5			499			249.5
	568			284			614			307			555			277.5
	463			231.5			584			292			465			232.5
	618			309			526			263			479			239.5
	552			276			626			313			618			309
	534			267			579			289.5			588			294
	632			316			589			294.5			576			288
	580			290			612			306			578			289
							546			273			571			285.5
							511			255.5			411			205.5
							623			311.5			467			233.5
							558			279			550			275			Descriptive Statistics:
							617			308.5			361			180.5				emb PGC volume
							475			237.5			589			294.5			Mean	274.7
							512			256			507			253.5			Std. Deviation	12.45
							553			276.5			608			304			Std. Error of Mean	7.186
							676			338
							540			270
							637			318.5
							540			270
