# Supplementary material for: Independent regulation of mitochondrial DNA quantity and quality in Caenorhabditis elegans primordial germ cells
Source: eLife. 2022 Oct 6;11:e80396. doi: 10.7554/eLife.80396 (PMC9536838; doi:10.7554/eLife.80396)
Supplement: Figure 2—figure supplement 4—source data 1. [file elife-80396-fig2-figsupp4-data1.xlsx]

## Sheet: mito pH
	Whole mitochondrial network:												Acidified region:													Ratio paired two tailed t-test:
	2021-10-14				2021-12-21				2021-12-01				2021-10-14				2021-12-21				2021-12-01
	whole mitochondrial network:				whole mitochondrial network:				whole mitochondrial network:				Acidified region:				Acidified region:				Acidified region:					Column B	Acidified region
	Dendra intensity:	mCherry intensity:	G/R		Dendra intensity:	mCherry intensity:	G/R		Dendra intensity:	mCherry intensity:	G/R		Dendra intensity:	mCherry intensity:	G/R		Dendra intensity:	mCherry intensity:	G/R		Dendra intensity:	mCherry intensity:	G/R			vs.	vs.
	49647	41235	1.204		54752	50251	1.08957		29494	26699	1.10469		21061	55089	0.382309		20699	42704	0.484709		21736	46124	0.471251			Column A	Whole network
	27339	26072	1.0486		29722	19379	1.53372		20546	22759	0.902764		23492	57322	0.409825		19459	33062	0.588561		13435	44175	0.304131
	31573	36593	0.862815		29370	24433	1.20206		16330	21835	0.747882		26887	50348	0.534023		14753	32016	0.460801		7585	39797	0.190592			Ratio paired t test
	48351	34257	1.41142		29766	24629	1.20858		39791	34436	1.15551		26535	48564	0.546392		16828	36267	0.464003		18645	47680	0.391044			P value	0.0004
	63301	62135	1.01877		24729	23952	1.03244		24275	18998	1.27777		9824	44645	0.220047		18521	39978	0.46328		13313	48094	0.276812			P value summary	***
	62160	58871	1.05587		45192	31564	1.43176		24454	24345	1.00448		22385	51175	0.437421		26995	52520	0.513995		13043	55424	0.235331			Significantly different (P < 0.05)?	Yes
	30009	23823	1.25967		33722	30579	1.10278		24784	26385	0.939322		32565	58285	0.55872		15320	42381	0.361483		12643	37342	0.338573			One- or two-tailed P value?	Two-tailed
	30132	21607	1.39455		21375	15239	1.40265		37965	24695	1.53736		22571	42033	0.536983		30526	50422	0.60541		12681	27359	0.463504			t, df	t=51.03, df=2
	36563	27645	1.32259		19133	14158	1.35139		28802	25738	1.11905		30793	59067	0.521323		25769	43725	0.589342		26131	50334	0.519152			Number of pairs	3
	57204	44705	1.27959		34563	23744	1.45565		21774	23702	0.918657		18778	55934	0.335717		10999	46579	0.236136		13515	37279	0.362537
	62632	49117	1.27516						12631	16722	0.755352		23459	59811	0.392219						18090	47343	0.382105			How big is the difference?
	25781	19583	1.3165						23381	25954	0.900863		19033	54202	0.351149						15046	34570	0.435233			Geometric mean of ratios (B / A)	0.3578
	42010	29062	1.44553										32559	56912	0.572094											SD of log(ratios)	0.01515
	38673	23314	1.65879										22107	44759	0.493912											SEM of log(ratios)	0.008747
	45136	31676	1.42493										21855	55293	0.395258											95% confidence interval	0.3281 to 0.3902
	58779	48715	1.20659										22970	51343	0.447383											R squared (partial eta squared)	0.9992
	48241	34223	1.40961										18259	47405	0.38517
																										How effective was the pairing?
																										Correlation coefficient (r)	0.9717
																										P value (one tailed)	0.076
																										P value summary	ns
																										Was the pairing significantly effective?	No
			Mean 1:				Mean 2:				Mean 3:				Mean 1:				Mean 2:				Mean 3:
			1.27029				1.28106				1.03031				0.44235				0.476772				0.364189
		Descriptive Statistics:												Descriptive Statistics:
			Whole network												Acidified region:
		Mean	1.194											Mean	0.4278
		Std. Deviation	0.1418											Std. Deviation	0.05769
		Std. Error of Mean	0.08185											Std. Error of Mean	0.03331
