# Supplementary material for: Independent regulation of mitochondrial DNA quantity and quality in Caenorhabditis elegans primordial germ cells
Source: eLife. 2022 Oct 6;11:e80396. doi: 10.7554/eLife.80396 (PMC9536838; doi:10.7554/eLife.80396)
Supplement: Figure 3—figure supplement 1—source data 1. [file elife-80396-fig3-figsupp1-data1.xlsx]

## Sheet: Stats
	WT L4 qPCR									Unpaired Two tailed t-test:	L4 copy number means		Unpaired Two tailed t-test:	L4 copy number means		Unpaired Two tailed t-test:	L4 copy number means
	exp1	exp2	exp3	exp4						Column C	TFAM-GFP(11) copy number		Column C	TFAM-GFP(11) copy number		Column B	TFAM-GFP copy number
	2020-01-31	2020-02-03	2020-02-08	2020-02-07						vs.	vs.		vs.	vs.		vs.	vs.
	236790	264054	263520	222961						Column A	WT copy number		Column B	TFAM-GFP copy number		Column A	WT copy number
	354699	295331	236955	235055
	260662	350432	298553	222295						Unpaired t test			Unpaired t test			Unpaired t test
	221766	237251	244368	305829						P value	0.0591		P value	0.0096		P value	0.0003
	314374	265949	276121	249857						P value summary	ns		P value summary	**		P value summary	***
	320278	327763	303129	230378						Significantly different (P < 0.05)?	No		Significantly different (P < 0.05)?	Yes		Significantly different (P < 0.05)?	Yes
	248705	235168	293360	225851						One- or two-tailed P value?	Two-tailed		One- or two-tailed P value?	Two-tailed		One- or two-tailed P value?	Two-tailed
	191202	255298	210255	412185						t, df	t=2.434, df=5		t, df	t=4.657, df=4		t, df	t=8.630, df=5
						Descriptive statistics:				How big is the difference?			How big is the difference?			How big is the difference?
	Mean 1:	Mean 2:	Mean 3:	Mean 4:		Mean	269075			Mean of column A	269075		Mean of column B	108913		Mean of column A	269075
	268560	278906	265783	263051		Std. Deviation	6929			Mean of column C	234676		Mean of column C	234676		Mean of column B	108913
						Std. Error of Mean	3464			Difference between means (C - A) ± SEM	-34398 ± 14134		Difference between means (C - B) ± SEM	125764 ± 27007		Difference between means (B - A) ± SEM	-160162 ± 18558
										95% confidence interval	-70730 to 1934		95% confidence interval	50781 to 200746		95% confidence interval	-207866 to -112457
										R squared (eta squared)	0.5423		R squared (eta squared)	0.8443		R squared (eta squared)	0.9371
	TFAM-GFP L4 qPCR									F test to compare variances			F test to compare variances			F test to compare variances
										F, DFn, Dfd	16.33, 2, 3		F, DFn, Dfd	1.791, 2, 2		F, DFn, Dfd	29.24, 2, 3
	exp1	exp2	exp3							P value	0.0488		P value	0.7167		P value	0.0216
	2020-02-24	2020-02-26	2020-10-16							P value summary	*		P value summary	ns		P value summary	*
	133691	65306	180640							Significantly different (P < 0.05)?	Yes		Significantly different (P < 0.05)?	No		Significantly different (P < 0.05)?	Yes
	115747	96495.2	136372
	63876.8	81825.6	160193							Data analyzed			Data analyzed			Data analyzed
	104339	80597.6	155253							Sample size, column A	4		Sample size, column B	3		Sample size, column A	4
	130128	56757.5	148467							Sample size, column C	3		Sample size, column C	3		Sample size, column B	3
	108127	71373.2	149117
	111155	81697.3	133374
	111651	73423.6	133837
	70983.1
	104390
	101228
	61793.8
	109591
	115458
	110123
	66076.7
						Descriptive statistics:
	Mean 1:	Mean 2:	Mean 3:			Mean	108913
	101148	75934.5	149657			Std. Deviation	37470
						Std. Error of Mean	21633
	TFAM-GFP(11) L4 qPCR
	exp1	exp2	exp3
	2020-12-18	2020-12-11	2020-12-07
	278147	221837	226361
	256901	233476	202920
	297469	219339	226541
	273454	192335	191121
	272758	241991	198404
	263749	196680	240216
	263632	212110	218432
	226471	195321	228381
			286096
			207021
			199766
			264735
			249089
			200607
			196204
			237233
						Descriptive statistics:
	Mean 1:	Mean 2:	Mean 3:			Mean	234676
	266573	214136	223320			Std. Deviation	28002
						Std. Error of Mean	16167

## Sheet: WT L4s
WT L4 qPCR Experiments
Experiment 1 (1-31-20):							Experiment 2 (2-03-20):							Experiment 3 (2-08-20):							Experiment 4 (2-07-20)
	Technical repeats:							Technical repeats:							Technical repeats:						Technical repeats:
Biological samples:	1	2	3				Biological samples:	1	2	3				Biological samples:	1	2	3			Biological samples:	1	2	3
1	21.88	21.92	21.66				1	21.64	21.71	21.61				1	21.62	21.73	21.62			1	22	21.7	22.04
2	21.35	21.24	21.06				2	21.57	21.44	21.45				2	21.75	21.93	21.77			2	21.8	21.84	21.84
3	21.71	21.52	21.8				3	21.21	21.24	21.24				3	21.1	21.69	21.7			3	21.9	21.93	21.9	CT values
4	21.98	21.78	21.99	CT values			4	21.87	21.76	21.81	CT values			4	21.68	21.84	21.79	CT values		4	21.43	21.43	21.44
5	21.31	21.44	21.43				5	21.73	21.61	21.59				5	21.64	21.59	21.53			5	21.8	21.65	21.76
6	21.53	21.11	21.49				6	21.35	21.3	21.34				6	21.47	21.43	21.44			6	21.88	21.85	21.84
7	21.82	21.68	21.73				7	21.84	21.76	21.88				7	21.46	21.58	21.45			7	21.69	21.98	22.01
8	22.04	22.17	22.2				8	21.67	21.71	21.73				8	21.96	22	22.02			8	21.15	21.16	20.7
	4.25872	4.24709	4.32267					4.32849	4.30814	4.33721					4.3343	4.30233	4.3343				4.22384	4.31105	4.21221
	4.41279	4.44477	4.49709					4.34884	4.38663	4.38372					4.29651	4.24419	4.2907				4.28198	4.27035	4.27035
	4.30814	4.36337	4.28198					4.45349	4.44477	4.44477					4.48547	4.31395	4.31105				4.25291	4.24419	4.25291
	4.22965	4.28779	4.22674	Adjusment to standard curve				4.26163	4.2936	4.27907	Adjusment to standard curve				4.31686	4.27035	4.28488	Adjusment to standard curve			4.38953	4.38953	4.38663	Adjusment to standard curve
	4.42442	4.38663	4.38953					4.30233	4.33721	4.34302					4.32849	4.34302	4.36047				4.28198	4.32558	4.2936
	4.36047	4.48256	4.37209					4.41279	4.42733	4.4157					4.37791	4.38953	4.38663				4.25872	4.26744	4.27035
	4.27616	4.31686	4.30233					4.27035	4.2936	4.25872					4.38081	4.34593	4.38372				4.31395	4.22965	4.22093
	4.21221	4.17442	4.1657					4.31977	4.30814	4.30233					4.23547	4.22384	4.21802				4.47093	4.46802	4.60174
	18143.5	17664.2	21022					21305.3	20330.1	21737.5					21592.5	20059.8	21592.5				16743.2	20466.6	16300.8
	25869.7	27846.3	31411.8					22327.4	24357.2	24194.7					19793	17546.3	19529.8				19141.5	18635.8	18635.8
	20330.1	23087.2	19141.5					28411.1	27846.3	27846.3					30581.9	20604.1	20466.6				17902.2	17546.3	17902.2
	16968.8	19399.5	16855.6	Copy number				18265.3	19661	19013.8	Copy number				20742.5	18635.8	19270.1	Copy number			24520.8	24520.8	24357.2	Copy number
	26571.7	24357.2	24520.8					20059.8	21737.5	22030.4					21305.3	22030.4	22933.2				19141.5	21163.2	19661
	22933.2	30377.9	23555.5					25869.7	26750.1	26043.4					23873	24520.8	24357.2				18143.5	18511.5	18635.8
	18887	20742.5	20059.8					18635.8	19661	18143.5					24033.3	22178.4	24194.7				20604.1	16968.8	16631.5
	16300.8	14942.3	14645.3					20881.8	20330.1	20059.8					17197.5	16743.2	16520.5				29575.4	29378.1	39970.9
			18943.2							21124.3							21081.6						17836.9
			28375.9							23626.4							18956.4						18804.4
			20853	Average of techincal repeats						28034.6							23884.2						17783.6
			17741.3							18980	Average of techincal repeats						19549.5	Average of techincal repeats					24466.3	Average of techincal repeats
			25149.9							21275.9							22089.7						19988.6
			25622.2							26221.1							24250.3						18430.3
			19896.4							18813.4							23468.8						18068.1
			15296.1							20423.9							16820.4						32974.8
			236790							264054							263520						222961
			354699							295331							236955						235055
			260662							350432							298553						222295
			221766	Adjustment for dilution factor (12.5)						237251	Adjustment for dilution factor (12.5)						244368	Adjustment for dilution factor (12.5)					305829	Adjustment for dilution factor (12.5)
			314374							265949							276121						249857
			320278							327763							303129						230378
			248705							235168							293360						225851
			191202							255298							210255						412185
			Mean 1:							Mean 2:							Mean 3:						Mean 4:
			268560							278906							265783						263051

## Sheet: xn107(Hmg-5-GFP)
Experiment 1 (2-24-20):							Experiment 1 (2-24-20):							Experiment 2 (2-26-20):							Experiment 3 (10-16-20):
	Technical repeats:							Technical repeats:							Technical repeats:							Technical repeats:
Biological samples:	1	2	3				Biological samples:	1	2	3				Biological samples:	1	2	3				Biological samples:	1	2	3
1	22.7	22.62	22.69				1	23.66	23.66	23.53				1	23.72	23.75	23.75				1	22.2	22.23	22.23
2	22.83	22.84	22.99				2	23.11	23.01	23				2	23.23	23.23	23.02				2	22.62	22.66	22.64
3	23.86	23.63	23.84				3	23.18	23.06	23.02				3	23.06	23.65	23.57				3	22.43	22.43	22.34
4	23.06	23.02	23.04	CT values			4	23.88	23.83	23.76	CT values			4	23.27	23.52	23.5	CT values			4	22.42	22.42	22.5	CT values
5	22.73	22.7	22.7				5	22.98	22.94	22.98				5	23.99	23.9	23.96				5	22.47	22.52	22.55
6	22.98	22.98	23				6	22.94	22.93	22.8				6	23.74	23.55	23.54				6	22.52	22.53	22.47
7	23.03	22.93	22.88				7	22.95	23.02	22.91				7	23.44	23.46	23.32				7	22.7	22.68	22.64
8	23.01	22.95	22.86				8	23.75	23.77	23.65				8	23.67	23.51	23.52				8	22.73	22.56	22.72
	4.02035	4.0436	4.02326					3.74128	3.74128	3.77907					3.72384	3.71512	3.71512					4.1657	4.15698	4.15698
	3.98256	3.97965	3.93605					3.90116	3.93023	3.93314					3.86628	3.86628	3.92733					4.0436	4.03198	4.03779
	3.68314	3.75	3.68895					3.88081	3.9157	3.92733					3.9157	3.74419	3.76744					4.09884	4.09884	4.125
	3.9157	3.92733	3.92151	Adjusment to standard curve				3.67733	3.69186	3.71221	Adjusment to standard curve				3.85465	3.78198	3.78779	Adjusment to standard curve				4.10174	4.10174	4.07849	Adjusment to standard curve
	4.01163	4.02035	4.02035					3.93895	3.95058	3.93895					3.64535	3.67151	3.65407					4.08721	4.07267	4.06395
	3.93895	3.93895	3.93314					3.95058	3.95349	3.99128					3.71802	3.77326	3.77616					4.07267	4.06977	4.08721
	3.92442	3.95349	3.96802					3.94767	3.92733	3.9593					3.80523	3.79942	3.84012					4.02035	4.02616	4.03779
	3.93023	3.94767	3.97384					3.71512	3.7093	3.74419					3.73837	3.78488	3.78198					4.01163	4.06105	4.01453
	10479.7	11056.2	10550.1					5511.62	5511.62	6012.7					5294.65	5189.39	5189.39					14645.3	14354.1	14354.1
	9606.34	9542.26	8630.71					7964.58	8515.94	8573.13					7349.86	7349.86	8459.13					11056.2	10764.1	10909.1
	4821.03	5623.41	4886					7600.01	8235.65	8459.13					8235.65	5548.63	5853.85					12555.6	12555.6	13335.2
	8235.65	8459.13	8346.64	Copy number				4756.92	4918.81	5154.77	Copy number				7155.68	6053.08	6134.66	Copy number				12639.9	12639.9	11980.9	Copy number
	10271.4	10479.7	10479.7					8688.67	8924.45	8688.67					4419.25	4693.66	4508.89					12223.9	11821.5	11586.5
	8688.67	8688.67	8573.13					8924.45	8984.39	9801.2					5224.24	5932.75	5972.59					11821.5	11742.7	12223.9
	8402.7	8984.39	9290.16					8864.91	8459.13	9105.47					6386.05	6301.13	6920.16					10479.7	10620.9	10909.1
	8515.94	8864.91	9415.37					5189.39	5120.38	5548.63					5474.85	6093.74	6053.08					10271.4	11509.2	10340.3
			10695.3							5678.65							5224.48							14451.2
			9259.77							8351.22							7719.62							10909.8
			5110.15	Average of techincal repeats						8098.26	Average of techincal repeats						6546.04	Average of techincal repeats						12815.5	Average of techincal repeats
			8347.14							4943.5							6447.81							12420.2
			10410.3							8767.27							4540.6							11877.3
			8650.16							9236.68							5709.86							11929.4
			8892.41							8809.84							6535.78							10669.9
			8932.07							5286.13							5873.89							10707
			133691							70983.1							65306							180640
			115747							104390							96495.2							136372
			63876.8							101228							81825.6							160193
			104339	Adjustment for dilution factor (12.5)						61793.8	Adjustment for dilution factor (12.5)						80597.6	Adjustment for dilution factor (12.5)						155253	Adjustment for dilution factor (12.5)
			130128							109591							56757.5							148467
			108127							115458							71373.2							149117
			111155							110123							81697.3							133374
			111651							66076.7							73423.6							133837
			109839							92455.5
							Mean 1:										Mean 2:							Mean 3:
							101148										75934.5							149657

## Sheet: TFAM-GFP-11 L4s
TFAM-GFP11 (xn167) L4 qPCR Experiments
Experiment 1 (12-18-20):							Experiment 2 (12-11-20):							Experiment 3 (12-07-20):								Experiment 3 (12-07-20):
	Technical repeats:							Technical repeats:							Technical repeats:							Technical repeats:
Biological samples:	1	2	3				Biological samples:	1	2	3				Biological samples:	1	2	3					1	2	3
1	21.77	21.62	21.69				1	21.94	21.87	21.93				1	21.91	21.91	21.83				Biological samples:	21.51	21.58	21.51
2	21.89	21.81	21.74				2	21.84	21.82	21.85				2	22.1	22.01	22.03				1	22.03	21.97	22.05
3	21.58	21.69	21.5				3	21.92	21.92	21.95				3	21.79	21.9	21.96				2	22.05	22.12	22.04
4	21.81	21.63	21.72	CT values			4	22.08	22.13	22.17	CT values			4	22.06	22.17	22.18	CT values			3	21.68	21.7	21.57	CT values
5	21.73	21.76	21.67				5	21.77	21.76	21.82				5	22.08	22.05	22.11				4	21.72	21.76	21.74
6	21.77	21.79	21.75				6	22.04	22.13	22.11				6	21.89	21.68	21.82				5	22.05	22.07	22.07
7	21.75	21.78	21.78				7	21.98	21.98	21.98				7	21.97	21.88	21.96				6	22.09	22.13	22.07
8	22	22.01	21.99				8	22.08	22.13	22.1				8	21.85	21.92	21.84				7	21.86	21.82	21.76
																					8
	4.2907	4.38305	4.36301					4.24128	4.26163	4.24419					4.25	4.25	4.27326					4.36628	4.34593	4.36628
	4.25581	4.32866	4.3487					4.27035	4.27616	4.26744					4.19477	4.22093	4.21512					4.21512	4.23256	4.2093
	4.34593	4.36301	4.41741					4.24709	4.24709	4.23837					4.28488	4.25291	4.23547					4.2093	4.18895	4.21221
	4.27907	4.38019	4.35442	Adjusment to standard curve				4.20058	4.18605	4.17442	Adjusment to standard curve				4.2064	4.17442	4.17151	Adjusment to standard curve				4.31686	4.31105	4.34884	Adjusment to standard curve
	4.30233	4.34297	4.36874					4.2907	4.2936	4.27616					4.20058	4.2093	4.19186					4.30523	4.2936	4.29942
	4.2907	4.33438	4.34583					4.21221	4.18605	4.19186					4.25581	4.31686	4.27616					4.2093	4.20349	4.20349
	4.29651	4.33725	4.33725					4.22965	4.22965	4.22965					4.23256	4.25872	4.23547					4.19767	4.18605	4.20349
	4.22384	4.2714	4.27713					4.20058	4.18605	4.19477					4.26744	4.24709	4.27035					4.26453	4.27616	4.2936
	19529.8	24157.5	23068.1					17429.3	18265.3	17546.3					17782.8	17782.8	18761					23242.3	22178.4	23242.3
	18022.5	21313.6	22320.2					18635.8	18887	18511.5					15659.1	16631.5	16410.3					16410.3	17082.8	16192.1
	22178.4	23068.1	26146.1					17664.2	17664.2	17313					19270.1	17902.2	17197.5					16192.1	15450.9	16300.8
	19013.8	23998.8	22616.4	Copy number				15870.2	15347.8	14942.3	Copy number				16084	14942.3	14842.7	Copy number				20742.5	20466.6	22327.4	Copy number
	20059.8	22027.8	23374.2					19529.8	19661	18887					15870.2	16192.1	15554.7					20194.5	19661	19925.9
	19529.8	21596.5	22173.5					16300.8	15347.8	15554.7					18022.5	20742.5	18887					16192.1	15976.7	15976.7
	19793	21739.3	21739.3					16968.8	16968.8	16968.8					17082.8	18143.5	17197.5					15764.3	15347.8	15976.7
	16743.2	18681	18928.9					15870.2	15347.8	15659.1					18511.5	17664.2	18635.8					18388	18887	19661
			22251.8							17747							18108.9							22887.7
			20552.1							18678.1							16233.6							16561.7
			23797.5	Average of techincal repeats						17547.1	Average of techincal repeats						18123.3	Average of techincal repeats						15981.3	Average of techincal repeats
			21876.3							15386.8							15289.7							21178.8
			21820.6							19359.2							15872.3							19927.1
			21099.9							15734.4							19217.3							16048.5
			21090.5							16968.8							17474.6							15696.3
			18117.7							15625.7							18270.5							18978.7
			278147							221837							226361							286096
			256901							233476							202920							207021
			297469							219339							226541							199766
			273454	Adjustment for dilution factor (12.5)						192335	Adjustment for dilution factor (12.5)						191121	Adjustment for dilution factor (12.5)						264735	Adjustment for dilution factor (12.5)
			272758							241991							198404							249089
			263749							196680							240216							200607
			263632							212110							218432							196204
			226471							195321							228381							237233
																	216547							230094
			Mean 1:							Mean 2:											Mean 3:
			266573							214136											223320
