# Supplementary material for: Independent regulation of mitochondrial DNA quantity and quality in Caenorhabditis elegans primordial germ cells
Source: eLife. 2022 Oct 6;11:e80396. doi: 10.7554/eLife.80396 (PMC9536838; doi:10.7554/eLife.80396)
Supplement: Figure 3—figure supplement 2—source data 1. [file elife-80396-fig3-figsupp2-data1.xlsx]

## Sheet: Ploidy stats
	WT L1 PGCs						WT fed 12hrs (mid L1 GSCs)								Unpaired Two tailed t-test:			Unpaired Two tailed t-test:
	exp1	exp2	exp3				exp1	exp2	exp3
	2020-09-22	2020-09-25	2020-09-29				2021-02-25	2021-03-03	2021-03-04						Column B	mid L1		Column C	L2
	4.06557	3.93443	3.60656				3.40984	3.01639	3.14754						vs.	vs.		vs.	vs.
	3.21311	3.7377	3.08197				3.40984	2.36066	3.01639						Column A	L1		Column A	L1
	3.34426	4.2623	3.34426	Descriptive statistics:			3.14754	2.7541	3.27869	Descriptive statistics:
				Mean	3.621					Mean	3.06				Unpaired t test			Unpaired t test
	Mean 1:	Mean 2:	Mean 3:	Std. Deviation	0.3245		Mean 1:	Mean 2:	Mean 3:	Std. Deviation	0.3152				P value	0.0111		P value	0.0402
	3.54098	3.97814	3.34426	Std. Error of Mean	0.1873		3.3224	2.71038	3.14754	Std. Error of Mean	0.182				P value summary	*		P value summary	*
															Significantly different (P < 0.05)?	Yes		Significantly different (P < 0.05)?	Yes
															One- or two-tailed P value?	Two-tailed		One- or two-tailed P value?	Two-tailed
															t, df	t=3.106, df=10		t, df	t=2.356, df=10
	TFAM-GFP L1 PGCs						WT fed 12hrs (mid L1 GSCs)
	exp1	exp2	exp3				exp1	exp2	exp3						How big is the difference?			How big is the difference?
	2020-10-27	2020-10-30	2020-11-06				2021-11-03	2021-11-05	2021-11-10						Mean of column A	3.998		Mean of column A	3.998
	4.19672	4.52459	4.06557				3.14754	1.5082	3.54098						Mean of column B	3.06		Mean of column C	3.031
	4.06557	3.86885	4				4.06557	2.42623	3.80328						Difference between means (B - A) ± SEM	-0.9375 ± 0.3019		Difference between means (C - A) ± SEM	-0.9666 ± 0.4102
	3.93443	4.85246	4.45902	Descriptive statistics:			4.19672	1.83607	2.7541	Descriptive statistics:					95% confidence interval	-1.610 to -0.2649		95% confidence interval	-1.881 to -0.05255
				Mean	4.219					Mean	3.031				R squared (eta squared)	0.491		R squared (eta squared)	0.357
	Mean 1:	Mean 2:	Mean 3:	Std. Deviation	0.1789		Mean 1:	Mean 2:	Mean 3:	Std. Deviation	0.9837
	4.06557	4.4153	4.17486	Std. Error of Mean	0.1033		3.80328	1.9235	3.36612	Std. Error of Mean	0.5679				F test to compare variances			F test to compare variances
															F, DFn, Dfd	2.329, 8, 2		F, DFn, Dfd	4.181, 2, 8
															P value	0.6699		P value	0.1143
															P value summary	ns		P value summary	ns
	uaDf5 L1 PGCs														Significantly different (P < 0.05)?	No		Significantly different (P < 0.05)?	No
	exp1	exp2	exp3
	2020-11-24	2020-12-02	2020-12-04												Data analyzed			Data analyzed
	4.45902	5.11475	4.19672												Sample size, column A	9		Sample size, column A	9
	5.63934	4.19672	2.62295												Sample size, column B	3		Sample size, column C	3
	3.67213	4.19672	3.27869	Descriptive statistics:
				Mean	4.153
	Mean 1:	Mean 2:	Mean 3:	Std. Deviation	0.6829
	4.59016	4.50273	3.36612	Std. Error of Mean	0.3943
	Combined L1 PGC ploidy
	WT exp1	WT exp2	WT exp3	TFAM-GFP exp1	TFAM-gfpexp2	TFAM-GFP exp3	uaDf5 exp1	uaDf5 exp2	uaDf5 exp3
	2020-09-22	2020-09-25	2020-09-29	2020-10-27	2020-10-30	2020-11-06	2020-11-24	2020-12-02	2020-12-04
	4.06557	3.93443	3.60656	4.19672	4.52459	4.06557	4.45902	5.11475	4.19672
	3.21311	3.7377	3.08197	4.06557	3.86885	4	5.63934	4.19672	2.62295
	3.34426	4.2623	3.34426	3.93443	4.85246	4.45902	3.67213	4.19672	3.27869	Descriptive statistics:
										Mean	3.998
	Mean 1:	Mean 2:	Mean 3:	Mean 4:	Mean 5:	Mean 6:	Mean 7:	Mean 8:	Mean 9:	Std. Deviation	0.4811
	3.54098	3.97814	3.34426	4.06557	4.4153	4.17486	4.59016	4.50273	3.36612	Std. Error of Mean	0.1604

## Sheet: GSC Ploidy calculation
	cox-4 DNA copies detected in sorted L1 PGC samples:														Ploidy calc: [(actual copies / expected copies (starved L1 average)] *4
	WT L1 PGCs						WT fed 12hrs (mid L1 GSCs)								L1 counts	mid-L1 counts	L2 counts		L1 ploidy	mid-L1 ploidy	L2 ploidy
	exp1	exp2	exp3				exp1	exp2	exp3						62	52	48		4.06557	3.40984	3.14754
	2020-09-22	2020-09-25	2020-09-29				2021-02-25	2021-03-03	2021-03-04						49	52	62		3.21311	3.40984	4.06557
	62	60	55				52	46	48						51	48	64		3.34426	3.14754	4.19672
	49	57	47				52	36	46
	51	65	51	Descriptive statistics:			48	42	50	Descriptive statistics:					60	46	23		3.93443	3.01639	1.5082
				Mean	55.22					Mean	46.67				57	36	37		3.7377	2.36066	2.42623
	Mean 1:	Mean 2:	Mean 3:	Std. Deviation	4.948		Mean 1:	Mean 2:	Mean 3:	Std. Deviation	4.807				65	42	28		4.2623	2.7541	1.83607
	54	60.6667	51	Std. Error of Mean	2.857		50.6667	41.3333	48	Std. Error of Mean	2.776
															55	48	54		3.60656	3.14754	3.54098
															47	46	58		3.08197	3.01639	3.80328
															51	50	42		3.34426	3.27869	2.7541
	TFAM-GFP L1 PGCs						WT fed 12hrs (mid L1 GSCs)
	exp1	exp2	exp3				exp1	exp2	exp3						64				4.19672
	2020-10-27	2020-10-30	2020-11-06				2021-11-03	2021-11-05	2021-11-10						62				4.06557
	64	69	62				48	23	54						60				3.93443
	62	59	61				62	37	58
	60	74	68	Descriptive statistics:			64	28	42	Descriptive statistics:					69				4.52459
				Mean	64.33					Mean	46.22				59				3.86885
	Mean 1:	Mean 2:	Mean 3:	Std. Deviation	2.728		Mean 1:	Mean 2:	Mean 3:	Std. Deviation	15				74				4.85246
	62	67.3333	63.6667	Std. Error of Mean	1.575		58	29.3333	51.3333	Std. Error of Mean	8.661
															62				4.06557
															61				4
															68				4.45902
	uaDf5 L1 PGCs
	exp1	exp2	exp3												68				4.45902
	2020-11-24	2020-12-02	2020-12-04												86				5.63934
	68	78	64												56				3.67213
	86	64	40
	56	64	50	Descriptive statistics:											78				5.11475
				Mean	63.33										64				4.19672
	Mean 1:	Mean 2:	Mean 3:	Std. Deviation	10.41										64				4.19672
	70	68.6667	51.3333	Std. Error of Mean	6.012
															64				4.19672
															40				2.62295
															50				3.27869
															MEAN of all WT:
															60.963
