# Supplementary material for: Independent regulation of mitochondrial DNA quantity and quality in Caenorhabditis elegans primordial germ cells
Source: eLife. 2022 Oct 6;11:e80396. doi: 10.7554/eLife.80396 (PMC9536838; doi:10.7554/eLife.80396)
Supplement: Figure 3—source data 1. [file elife-80396-fig3-data1.xlsx]

## Sheet: TFAM-GFP11 foci quant
	Embryos							Starved L1 Larvae							early-L1 (fed 6 hrs @23C)							mid-L1 (fed 9 hrs @23C)							mid-L1 (fed 12 hrs @23C)							mid-L1 (fed 12 hrs @23C)
	2020-12-14		2020-12-29		2021-01-05			2020-12-15		2020-12-30		2021-01-06			2021-01-12		2021-01-13		2021-01-15			2021-01-18		2021-01-22		2021-02-03			2021-01-19		2021-01-20		2021-02-02			2021-09-22		2021-10-06		2021-10-13
	foci / germline	foci / cell	foci / germline	foci / cell	foci / germline	foci / cell		foci / germline	foci / cell	foci / germline	foci / cell	foci / germline	foci / cell		foci / germline	foci / cell	foci / germline	foci / cell	foci / germline	foci / cell		foci / germline	foci / cell	foci / germline	foci / cell	foci / germline	foci / cell		foci / germline	foci / cell	foci / germline	foci / cell	foci / germline	foci / cell		foci / germline	foci / cell	foci / germline	foci / cell	foci / germline	foci / cell
	231	115.5	167	83.5	271	135.5		88	44	107	53.5	77	38.5		199	86.5217	255	110.87	243	105.652		210	48.8372	254	59.0698	235	54.6512		400	62.5	303	47.3438	399	62.3438		1000	45.2489	1466	66.3348	987	44.6606
	208	104	208	104	312	156		93	46.5	129	64.5	144	72		212	92.1739	187	81.3043	221	96.087		181	42.093	266	61.8605	241	56.0465		280	43.75	436	68.125	418	65.3125		720	32.5792	1216	55.0226	1468	66.4253
	329	164.5	133	66.5	279	139.5		57	28.5	79	39.5	95	47.5		134	58.2609	224	97.3913	263	114.348		249	57.907	291	67.6744	257	59.7674		250	39.0625	377	58.9062	402	62.8125		1157	52.3529	1014	45.8824	591	26.7421
	254	127	238	119	189	94.5		96	48	88	44	117	58.5		197	85.6522	233	101.304	174	75.6522		239	55.5814	181	42.093	312	72.5581		337	52.6562	318	49.6875	379	59.2188		995	45.0226	1394	63.0769	895	40.4977
	238	119	290	145	207	103.5		113	56.5	81	40.5	190	95		191	83.0435	201	87.3913	207	90		257	59.7674	193	44.8837	259	60.2326		405	63.2812	337	52.6562	387	60.4688		1224	55.3846	1613	72.9864	1002	45.3394
	292	146	192	96	270	135		118	59	62	31	87	43.5		240	104.348	233	101.304	271	117.826		278	64.6512	222	51.6279	355	82.5581		497	77.6562	367	57.3438	464	72.5		1012	45.7919	1471	66.5611	1047	47.3756
	250	125	196	98	302	151		108	54	84	42	106	53		220	95.6522	216	93.913	152	66.087		302	70.2326	266	61.8605	289	67.2093		232	36.25	306	47.8125	348	54.375		949	42.9412	1318	59.638	971	43.9367
	207	103.5	300	150	159	79.5		66	33	132	66	79	39.5		190	82.6087	207	90	157	68.2609		189	43.9535	264	61.3953	239	55.5814		338	52.8125	365	57.0312	344	53.75		1044	47.2398	1389	62.8507	1007	45.5656
	221	110.5	165	82.5	175	87.5		97	48.5	46	23	70	35		188	81.7391	158	68.6957	147	63.913		256	59.5349	351	81.6279	224	52.093		484	75.625	370	57.8125	351	54.8438		971	43.9367	866	39.1855	1059	47.9186
	220	110	175	87.5	258	129		74	37	50	25	110	55		287	124.783	169	73.4783	121	52.6087		288	66.9767	274	63.7209	236	54.8837		345	53.9062	242	37.8125	329	51.4062		1420	64.2534	1468	66.4253	1144	51.7647
	251	125.5	243	121.5	303	151.5		78	39	90	45	72	36		257	111.739	161	70	172	74.7826		214	49.7674	264	61.3953	202	46.9767		408	63.75	362	56.5625	318	49.6875		979	44.2986	1135	51.3575	924	41.81
	162	81	130	65	345	172.5		89	44.5	80	40	97	48.5		189	82.1739	228	99.1304	177	76.9565		218	50.6977	345	80.2326	253	58.8372		424	66.25	387	60.4688	307	47.9688		1295	58.5973	989	44.7511	1110	50.2262
	199	99.5	94	47	261	130.5		71	35.5	73	36.5	64	32		203	88.2609	165	71.7391	218	94.7826		217	50.4651	273	63.4884	299	69.5349		296	46.25	240	37.5	334	52.1875		1012	45.7919	972	43.9819	975	44.1176
	327	163.5	264	132	167	83.5		80	40	77	38.5	73	36.5		163	70.8696	236	102.609	212	92.1739		314	73.0233	236	54.8837	268	62.3256		359	56.0938	319	49.8438	298	46.5625		818	37.0136	1478	66.8778	1054	47.6923
	204	102	147	73.5	182	91		131	65.5	108	54	78	39		124	53.913	215	93.4783	220	95.6522		254	59.0698	154	35.814	294	68.3721		352	55	489	76.4062	388	60.625		1204	54.4796			1068	48.3258
	158	79	194	97	121	60.5		114	57	76	38	70	35		262	113.913	164	71.3043	185	80.4348		259	60.2326	262	60.9302	277	64.4186		575	89.8438	477	74.5312	454	70.9375		1259	56.9683			1240	56.1086
	189	94.5	183	91.5	159	79.5		112	56	107	53.5	73	36.5		211	91.7391	180	78.2609	140	60.8696		347	80.6977	267	62.093	214	49.7674		294	45.9375	419	65.4688	386	60.3125		1107	50.0905			1272	57.5566
	249	124.5	191	95.5	143	71.5		75	37.5	79	39.5	110	55		159	69.1304	189	82.1739	196	85.2174		184	42.7907	264	61.3953	298	69.3023		382	59.6875	362	56.5625	358	55.9375		1062	48.0543			1241	56.1538
	235	117.5	204	102	200	100		147	73.5	142	71				138	60	151	65.6522	188	81.7391		284	66.0465	252	58.6047				360	56.25	371	57.9688	382	59.6875		762	34.4796			678	30.6787
	186	93	308	154	137	68.5		134	67	90	45				171	74.3478	180	78.2609	270	117.391		299	69.5349	193	44.8837				458	71.5625	203	31.7188				1106	50.0452			841	38.0543
	228	114	299	149.5	266	133		105	52.5	95	47.5				201	87.3913	152	66.087	170	73.913		254	59.0698	261	60.6977				408	63.75	352	55				963	43.5747			1130	51.1312
	184	92	189	94.5	172	86		113	56.5	97	48.5				126	54.7826	87	37.8261	184	80				301	70						423	66.0938				1279	57.8733
			303	151.5	211	105.5		98	49						146		211							311	72.3256						519	81.0938				1326	60
			257	128.5	153	76.5		111	55.5						153		161														439	68.5938
			313	156.5				130	65						218		230														330	51.5625
								94	47						142		186
								145	72.5						213		215
								104	52						156		228
								80	40						271		198
								129	64.5						213
															120
															259
	Germline mean 1:	Cell mean 1:	Germline mean 1:	Cell mean 1:	Germline mean 1:	Cell mean 1:		Germline mean 1:	Cell mean 1:	Germline mean 1:	Cell mean 1:	Germline mean 1:	Cell mean 1:		Germline mean 1:	Cell mean 1:	Germline mean 1:	Cell mean 1:	Germline mean 1:	Cell mean 1:		Germline mean 1:	Cell mean 1:	Germline mean 1:	Cell mean 1:	Germline mean 1:	Cell mean 1:		Germline mean 1:	Cell mean 1:	Germline mean 1:	Cell mean 1:	Germline mean 1:	Cell mean 1:		Germline mean 1:	Cell mean 1:	Germline mean 1:	Cell mean 1:	Germline mean 1:	Cell mean 1:
	228.273	114.136	215.32	107.66	218.417	109.208		101.667	50.8333	89.6364	44.8182	95.1111	47.5556		192.281	84.2292	193.793	82.8261	194.909	84.7431		252.048	58.6157	258.478	60.1112	264	61.3953		375.429	58.6607	364.52	56.9562	370.842	57.9441		1072.35	48.5225	1270.64	57.4952	1033.52	46.7658
	Descriptive Statistics:	Foci / germline	Foci / cell					Descriptive Statistics:	Foci / germline	Foci / cell					Descriptive Statistics:	Foci / germline	Foci / cell					Descriptive Statistics:	Foci / germline	Foci / cell					Descriptive Statistics:	Foci / germline	Foci / cell					Descriptive Statistics:	Foci / germline	Foci / cell
	Mean	220.7	110.3					Mean	95.47	47.74					Mean	193.7	83.93					Mean	258.2	60.04					Mean	370.3	57.85					Mean	1126	50.93
	Std. Deviation	6.764	3.382					Std. Deviation	6.023	3.012					Std. Deviation	1.319	0.9923					Std. Deviation	5.982	1.391					Std. Deviation	5.477	0.8558					Std. Deviation	127.2	5.755
	Std. Error of Mean	3.905	1.953					Std. Error of Mean	3.478	1.739					Std. Error of Mean	0.7615	0.5729					Std. Error of Mean	3.454	0.8032					Std. Error of Mean	3.162	0.4941					Std. Error of Mean	73.43	3.323

## Sheet: TFAM foci per cell stats
	Unpaired two-tailed t-test	tfam/cell		Unpaired two-tailed t-test	tfam/cell		Unpaired two-tailed t-test	tfam/cell		Unpaired two-tailed t-test	tfam/cell		Unpaired two-tailed t-test	tfam/cell
	Column B	L1		Column C	early L1		Column D	mid-L1		Column E	late L1		Column F	L2
	vs.	vs.		vs.	vs.		vs.	vs.		vs.	vs.		vs.	vs.
	Column A	emb		Column B	L1		Column C	early L1		Column C	early L1		Column C	early L1
	Unpaired t test			Unpaired t test			Unpaired t test			Unpaired t test			Unpaired t test
	P value	<0.0001		P value	<0.0001		P value	<0.0001		P value	<0.0001		P value	0.0006
	P value summary	****		P value summary	****		P value summary	****		P value summary	****		P value summary	***
	Significantly different (P < 0.05)?	Yes		Significantly different (P < 0.05)?	Yes		Significantly different (P < 0.05)?	Yes		Significantly different (P < 0.05)?	Yes		Significantly different (P < 0.05)?	Yes
	One- or two-tailed P value?	Two-tailed		One- or two-tailed P value?	Two-tailed		One- or two-tailed P value?	Two-tailed		One- or two-tailed P value?	Two-tailed		One- or two-tailed P value?	Two-tailed
	t, df	t=23.94, df=4		t, df	t=19.77, df=4		t, df	t=24.22, df=4		t, df	t=34.47, df=4		t, df	t=9.789, df=4
	How big is the difference?			How big is the difference?			How big is the difference?			How big is the difference?			How big is the difference?
	Mean of column A	110.3		Mean of column B	47.74		Mean of column C	83.93		Mean of column C	83.93		Mean of column C	83.93
	Mean of column B	47.74		Mean of column C	83.93		Mean of column D	60.04		Mean of column E	57.85		Mean of column F	50.93
	Difference between means (B - A) ± SEM	-62.60 ± 2.615		Difference between means (C - B) ± SEM	36.20 ± 1.831		Difference between means (D - C) ± SEM	-23.89 ± 0.9866		Difference between means (E - C) ± SEM	-26.08 ± 0.7565		Difference between means (F - C) ± SEM	-33.00 ± 3.372
	95% confidence interval	-69.86 to -55.34		95% confidence interval	31.11 to 41.28		95% confidence interval	-26.63 to -21.15		95% confidence interval	-28.18 to -23.98		95% confidence interval	-42.37 to -23.64
	R squared (eta squared)	0.9931		R squared (eta squared)	0.9899		R squared (eta squared)	0.9932		R squared (eta squared)	0.9966		R squared (eta squared)	0.9599
	F test to compare variances			F test to compare variances			F test to compare variances			F test to compare variances			F test to compare variances
	F, DFn, Dfd	1.261, 2, 2		F, DFn, Dfd	9.211, 2, 2		F, DFn, Dfd	1.966, 2, 2		F, DFn, Dfd	1.344, 2, 2		F, DFn, Dfd	33.64, 2, 2
	P value	0.8845		P value	0.1959		P value	0.6744		P value	0.8531		P value	0.0577
	P value summary	ns		P value summary	ns		P value summary	ns		P value summary	ns		P value summary	ns
	Significantly different (P < 0.05)?	No		Significantly different (P < 0.05)?	No		Significantly different (P < 0.05)?	No		Significantly different (P < 0.05)?	No		Significantly different (P < 0.05)?	No
	Data analyzed			Data analyzed			Data analyzed			Data analyzed			Data analyzed
	Sample size, column A	3		Sample size, column B	3		Sample size, column C	3		Sample size, column C	3		Sample size, column C	3
	Sample size, column B	3		Sample size, column C	3		Sample size, column D	3		Sample size, column E	3		Sample size, column F	3
	Unpaired two-tailed t-test	tfam/cell		Unpaired two-tailed t-test	tfam/cell		Unpaired two-tailed t-test	tfam/cell		Unpaired two-tailed t-test	tfam/cell
	Column E	late-L1		Column F	L2		Column F	L2		Column F	L2
	vs.	vs.		vs.	vs.		vs.	vs.		vs.	vs.
	Column D	mid-L1		Column D	mid-L1		Column E	late L1		Column B	L1
	Unpaired t test			Unpaired t test			Unpaired t test			Unpaired t test
	P value	0.0812		P value	0.056		P value	0.1082		P value	0.4426
	P value summary	ns		P value summary	ns		P value summary	ns		P value summary	ns
	Significantly different (P < 0.05)?	No		Significantly different (P < 0.05)?	No		Significantly different (P < 0.05)?	No		Significantly different (P < 0.05)?	No
	One- or two-tailed P value?	Two-tailed		One- or two-tailed P value?	Two-tailed		One- or two-tailed P value?	Two-tailed		One- or two-tailed P value?	Two-tailed
	t, df	t=2.319, df=4		t, df	t=2.666, df=4		t, df	t=2.062, df=4		t, df	t=0.8512, df=4
	How big is the difference?			How big is the difference?			How big is the difference?			How big is the difference?
	Mean of column D	60.04		Mean of column D	60.04		Mean of column E	57.85		Mean of column B	47.74
	Mean of column E	57.85		Mean of column F	50.93		Mean of column F	50.93		Mean of column F	50.93
	Difference between means (E - D) ± SEM	-2.187 ± 0.9430		Difference between means (F - D) ± SEM	-9.113 ± 3.418		Difference between means (F - E) ± SEM	-6.926 ± 3.359		Difference between means (F - B) ± SEM	3.192 ± 3.750
	95% confidence interval	-4.805 to 0.4311		95% confidence interval	-18.60 to 0.3778		95% confidence interval	-16.25 to 2.401		95% confidence interval	-7.220 to 13.60
	R squared (eta squared)	0.5735		R squared (eta squared)	0.6399		R squared (eta squared)	0.5152		R squared (eta squared)	0.1534
	F test to compare variances			F test to compare variances			F test to compare variances			F test to compare variances
	F, DFn, Dfd	2.642, 2, 2		F, DFn, Dfd	17.11, 2, 2		F, DFn, Dfd	45.22, 2, 2		F, DFn, Dfd	3.652, 2, 2
	P value	0.5491		P value	0.1104		P value	0.0433		P value	0.43
	P value summary	ns		P value summary	ns		P value summary	*		P value summary	ns
	Significantly different (P < 0.05)?	No		Significantly different (P < 0.05)?	No		Significantly different (P < 0.05)?	Yes		Significantly different (P < 0.05)?	No
	Data analyzed			Data analyzed			Data analyzed			Data analyzed
	Sample size, column D	3		Sample size, column D	3		Sample size, column E	3		Sample size, column B	3
	Sample size, column E	3		Sample size, column F	3		Sample size, column F	3		Sample size, column F	3

## Sheet: WT sorted cell mtDNA stats
	Unpaired two-tailed t-test	mtDNAs/germline		Unpaired two-tailed t-test	mtDNAs/germline		Unpaired two-tailed t-test	mtDNAs/germline
	Column C	mid-L1		Column C	mid-L1		Column D	L2
	vs.	vs.		vs.	vs.		vs.	vs.
	Column A	emb		Column B	L1		Column C	MID-L1
	Unpaired t test			Unpaired t test			Unpaired t test
	P value	0.4736		P value	0.0065		P value	0.0024
	P value summary	ns		P value summary	**		P value summary	**
	Significantly different (P < 0.05)?	No		Significantly different (P < 0.05)?	Yes		Significantly different (P < 0.05)?	Yes
	One- or two-tailed P value?	Two-tailed		One- or two-tailed P value?	Two-tailed		One- or two-tailed P value?	Two-tailed
	t, df	t=0.7903, df=4		t, df	t=5.201, df=4		t, df	t=6.863, df=4
	How big is the difference?			How big is the difference?			How big is the difference?
	Mean of column A	802.7		Mean of column B	441.4		Mean of column C	755.6
	Mean of column C	755.6		Mean of column C	755.6		Mean of column D	3861
	Difference between means (C - A) ± SEM	-47.14 ± 59.65		Difference between means (C - B) ± SEM	314.2 ± 60.40		Difference between means (D - C) ± SEM	3106 ± 452.5
	95% confidence interval	-212.7 to 118.5		95% confidence interval	146.4 to 481.9		95% confidence interval	1849 to 4362
	R squared (eta squared)	0.135		R squared (eta squared)	0.8712		R squared (eta squared)	0.9217
	F test to compare variances			F test to compare variances			F test to compare variances
	F, DFn, Dfd	6.958, 2, 2		F, DFn, Dfd	5.786, 2, 2		F, DFn, Dfd	64.83, 2, 2
	P value	0.2513		P value	0.2947		P value	0.0304
	P value summary	ns		P value summary	ns		P value summary	*
	Significantly different (P < 0.05)?	No		Significantly different (P < 0.05)?	No		Significantly different (P < 0.05)?	Yes
	Data analyzed			Data analyzed			Data analyzed
	Sample size, column A	3		Sample size, column B	3		Sample size, column C	3
	Sample size, column C	3		Sample size, column C	3		Sample size, column D	3
	Unpaired two-tailed t-test	mtDNAs/Cell		Unpaired two-tailed t-test	mtDNAs/Cell		Unpaired two-tailed t-test	mtDNAs/Cell
	Column B	L1		Column C	mid-L1		Column D	L2
	vs.	vs.		vs.	vs.		vs.	vs.
	Column A	emb		Column A	emb		Column A	emb
	Unpaired t test			Unpaired t test			Unpaired t test
	P value	0.0003		P value	0.0003		P value	0.0023
	P value summary	***		P value summary	***		P value summary	**
	Significantly different (P < 0.05)?	Yes		Significantly different (P < 0.05)?	Yes		Significantly different (P < 0.05)?	Yes
	One- or two-tailed P value?	Two-tailed		One- or two-tailed P value?	Two-tailed		One- or two-tailed P value?	Two-tailed
	t, df	t=11.51, df=4		t, df	t=12.14, df=4		t, df	t=6.895, df=4
	How big is the difference?			How big is the difference?			How big is the difference?
	Mean of column A	401.3		Mean of column A	401.3		Mean of column A	401.3
	Mean of column B	220.7		Mean of column C	188.9		Mean of column D	214.5
	Difference between means (B - A) ± SEM	-180.6 ± 15.69		Difference between means (C - A) ± SEM	-212.5 ± 17.50		Difference between means (D - A) ± SEM	-186.8 ± 27.10
	95% confidence interval	-224.2 to -137.1		95% confidence interval	-261.0 to -163.9		95% confidence interval	-262.1 to -111.6
	R squared (eta squared)	0.9707		R squared (eta squared)	0.9736		R squared (eta squared)	0.9224
	F test to compare variances			F test to compare variances			F test to compare variances
	F, DFn, Dfd	1.203, 2, 2		F, DFn, Dfd	1.739, 2, 2		F, DFn, Dfd	5.569, 2, 2
	P value	0.908		P value	0.7301		P value	0.3045
	P value summary	ns		P value summary	ns		P value summary	ns
	Significantly different (P < 0.05)?	No		Significantly different (P < 0.05)?	No		Significantly different (P < 0.05)?	No
	Data analyzed			Data analyzed			Data analyzed
	Sample size, column A	3		Sample size, column A	3		Sample size, column A	3
	Sample size, column B	3		Sample size, column C	3		Sample size, column D	3
	Unpaired two-tailed t-test	mtDNAs/Cell		Unpaired two-tailed t-test	mtDNAs/Cell		Unpaired two-tailed t-test	mtDNAs/Cell
	Column C	mid-L1		Column D	L2		Column D	L2
	vs.	vs.		vs.	vs.		vs.	vs.
	Column B	L1		Column B	L1		Column C	mid-L1
	Unpaired t test			Unpaired t test			Unpaired t test
	P value	0.1542		P value	0.8333		P value	0.4205
	P value summary	ns		P value summary	ns		P value summary	ns
	Significantly different (P < 0.05)?	No		Significantly different (P < 0.05)?	No		Significantly different (P < 0.05)?	No
	One- or two-tailed P value?	Two-tailed		One- or two-tailed P value?	Two-tailed		One- or two-tailed P value?	Two-tailed
	t, df	t=1.754, df=4		t, df	t=0.2246, df=4		t, df	t=0.8968, df=4
	How big is the difference?			How big is the difference?			How big is the difference?
	Mean of column B	220.7		Mean of column B	220.7		Mean of column C	188.9
	Mean of column C	188.9		Mean of column D	214.5		Mean of column D	214.5
	Difference between means (C - B) ± SEM	-31.81 ± 18.13		Difference between means (D - B) ± SEM	-6.180 ± 27.51		Difference between means (D - C) ± SEM	25.63 ± 28.58
	95% confidence interval	-82.16 to 18.54		95% confidence interval	-82.56 to 70.20		95% confidence interval	-53.72 to 105.0
	R squared (eta squared)	0.4348		R squared (eta squared)	0.01246		R squared (eta squared)	0.1674
	F test to compare variances			F test to compare variances			F test to compare variances
	F, DFn, Dfd	1.446, 2, 2		F, DFn, Dfd	4.631, 2, 2		F, DFn, Dfd	3.202, 2, 2
	P value	0.8175		P value	0.3552		P value	0.476
	P value summary	ns		P value summary	ns		P value summary	ns
	Significantly different (P < 0.05)?	No		Significantly different (P < 0.05)?	No		Significantly different (P < 0.05)?	No
	Data analyzed			Data analyzed			Data analyzed
	Sample size, column B	3		Sample size, column B	3		Sample size, column C	3
	Sample size, column C	3		Sample size, column D	3		Sample size, column D	3

## Sheet: nop-1 sorted cell mtDNA stats
	Unpaired two-tailed t-test	nop-1 mtDNA/germline		Unpaired two-tailed t-test	nop-1 mtDNA/germline		Unpaired two-tailed t-test	nop-1 mtDNA/germline
	Column B	nop-1 L1		Column D	nop-1 L2		Column D	nop-1 L2
	vs.	vs.		vs.	vs.		vs.	vs.
	Column A	nop-1 emb		Column A	nop-1 emb		Column B	nop-1 L1
	Unpaired t test			Unpaired t test			Unpaired t test
	P value	0.1704		P value	0.0193		P value	0.0176
	P value summary	ns		P value summary	*		P value summary	*
	Significantly different (P < 0.05)?	No		Significantly different (P < 0.05)?	Yes		Significantly different (P < 0.05)?	Yes
	One- or two-tailed P value?	Two-tailed		One- or two-tailed P value?	Two-tailed		One- or two-tailed P value?	Two-tailed
	t, df	t=1.669, df=4		t, df	t=3.791, df=4		t, df	t=3.899, df=4
	How big is the difference?			How big is the difference?			How big is the difference?
	Mean of column A	697.3		Mean of column A	697.3		Mean of column B	614.2
	Mean of column B	614.2		Mean of column C	3449		Mean of column C	3449
	Difference between means (B - A) ± SEM	-83.17 ± 49.82		Difference between means (C - A) ± SEM	2752 ± 725.8		Difference between means (C - B) ± SEM	2835 ± 727.1
	95% confidence interval	-221.5 to 55.17		95% confidence interval	736.4 to 4767		95% confidence interval	816.1 to 4853
	R squared (eta squared)	0.4106		R squared (eta squared)	0.7823		R squared (eta squared)	0.7917
	F test to compare variances			F test to compare variances			F test to compare variances
	F, DFn, Dfd	6.438, 2, 2		F, DFn, Dfd	1577, 2, 2		F, DFn, Dfd	245.0, 2, 2
	P value	0.2689		P value	0.0013		P value	0.0081
	P value summary	ns		P value summary	**		P value summary	**
	Significantly different (P < 0.05)?	No		Significantly different (P < 0.05)?	Yes		Significantly different (P < 0.05)?	Yes
	Data analyzed			Data analyzed			Data analyzed
	Sample size, column A	3		Sample size, column A	3		Sample size, column B	3
	Sample size, column B	3		Sample size, column C	3		Sample size, column C	3
	Unpaired two-tailed t-test	nop-1 mtDNA/germline		Unpaired two-tailed t-test	nop-1 mtDNA/germline		Unpaired two-tailed t-test	nop-1 mtDNA/germline
	Column D	nop-1 L2		Column C	nop-1 mid- L1		Column C	nop-1 mid L1
	vs.	vs.		vs.	vs.		vs.	vs.
	Column C	nop-1 mid L1		Column A	nop-1 emb		Column B	nop-1 L1
	Unpaired t test			Unpaired t test			Unpaired t test
	P value	0.0238		P value	0.2256		P value	0.1087
	P value summary	*		P value summary	ns		P value summary	ns
	Significantly different (P < 0.05)?	Yes		Significantly different (P < 0.05)?	No		Significantly different (P < 0.05)?	No
	One- or two-tailed P value?	Two-tailed		One- or two-tailed P value?	Two-tailed		One- or two-tailed P value?	Two-tailed
	t, df	t=3.548, df=4		t, df	t=1.431, df=4		t, df	t=2.058, df=4
	How big is the difference?			How big is the difference?			How big is the difference?
	Mean of column A	848.3		Mean of column A	697.3		Mean of column B	614.2
	Mean of column B	3449		Mean of column C	848.3		Mean of column C	848.3
	Difference between means (B - A) ± SEM	2601 ± 733.0		Difference between means (C - A) ± SEM	151.0 ± 105.5		Difference between means (C - B) ± SEM	234.2 ± 113.8
	95% confidence interval	565.5 to 4636		95% confidence interval	-141.9 to 443.9		95% confidence interval	-81.69 to 550.0
	R squared (eta squared)	0.7589		R squared (eta squared)	0.3387		R squared (eta squared)	0.5144
	F test to compare variances			F test to compare variances			F test to compare variances
	F, DFn, Dfd	48.78, 2, 2		F, DFn, Dfd	32.34, 2, 2		F, DFn, Dfd	5.023, 2, 2
	P value	0.0402		P value	0.06		P value	0.3321
	P value summary	*		P value summary	ns		P value summary	ns
	Significantly different (P < 0.05)?	Yes		Significantly different (P < 0.05)?	No		Significantly different (P < 0.05)?	No
	Data analyzed			Data analyzed			Data analyzed
	Sample size, column A	3		Sample size, column A	3		Sample size, column B	3
	Sample size, column B	3		Sample size, column C	3		Sample size, column C	3
	Table Analyzed	nop-1 mtDNA/cell		Table Analyzed	nop-1 mtDNA/cell		Table Analyzed	nop-1 mtDNA/cell
	Column B	nop-1 L1		Column D	nop-1 L2		Column D	nop-1 L2
	vs.	vs.		vs.	vs.		vs.	vs.
	Column A	nop-1 emb		Column A	nop-1 emb		Column B	nop-1 L1
	Unpaired t test			Unpaired t test			Unpaired t test
	P value	0.1704		P value	0.0131		P value	0.0483
	P value summary	ns		P value summary	*		P value summary	*
	Significantly different (P < 0.05)?	No		Significantly different (P < 0.05)?	Yes		Significantly different (P < 0.05)?	Yes
	One- or two-tailed P value?	Two-tailed		One- or two-tailed P value?	Two-tailed		One- or two-tailed P value?	Two-tailed
	t, df	t=1.669, df=4		t, df	t=4.257, df=4		t, df	t=2.811, df=4
	How big is the difference?			How big is the difference?			How big is the difference?
	Mean of column A	348.7		Mean of column A	348.7		Mean of column B	307.1
	Mean of column B	307.1		Mean of column C	181.5		Mean of column C	181.5
	Difference between means (B - A) ± SEM	-41.58 ± 24.91		Difference between means (C - A) ± SEM	-167.1 ± 39.27		Difference between means (C - B) ± SEM	-125.6 ± 44.67
	95% confidence interval	-110.8 to 27.58		95% confidence interval	-276.2 to -58.12		95% confidence interval	-249.6 to -1.525
	R squared (eta squared)	0.4106		R squared (eta squared)	0.8192		R squared (eta squared)	0.6638
	F test to compare variances			F test to compare variances			F test to compare variances
	F, DFn, Dfd	6.438, 2, 2		F, DFn, Dfd	17.48, 2, 2		F, DFn, Dfd	2.715, 2, 2
	P value	0.2689		P value	0.1082		P value	0.5384
	P value summary	ns		P value summary	ns		P value summary	ns
	Significantly different (P < 0.05)?	No		Significantly different (P < 0.05)?	No		Significantly different (P < 0.05)?	No
	Data analyzed			Data analyzed			Data analyzed
	Sample size, column A	3		Sample size, column A	3		Sample size, column B	3
	Sample size, column B	3		Sample size, column C	3		Sample size, column C	3
	Table Analyzed	nop-1 mtDNA/cell		Table Analyzed	nop-1 mtDNA/cell		Table Analyzed	nop-1 mtDNA/cell
	Column D	nop-1 L2		Column C	nop-1 mid- L1		Column C	nop-1 mid L1
	vs.	vs.		vs.	vs.		vs.	vs.
	Column C	nop-1 mid L1		Column A	nop-1 emb		Column B	nop-1 L1
	Unpaired t test			Unpaired t test			Unpaired t test
	P value	0.8141		P value	0.0035		P value	0.026
	P value summary	ns		P value summary	**		P value summary	*
	Significantly different (P < 0.05)?	No		Significantly different (P < 0.05)?	Yes		Significantly different (P < 0.05)?	Yes
	One- or two-tailed P value?	Two-tailed		One- or two-tailed P value?	Two-tailed		One- or two-tailed P value?	Two-tailed
	t, df	t=0.2511, df=4		t, df	t=6.157, df=4		t, df	t=3.454, df=4
	How big is the difference?			How big is the difference?			How big is the difference?
	Mean of column A	192.8		Mean of column A	348.7		Mean of column B	307.1
	Mean of column B	181.5		Mean of column C	192.8		Mean of column C	192.8
	Difference between means (B - A) ± SEM	-11.28 ± 44.90		Difference between means (C - A) ± SEM	-155.9 ± 25.32		Difference between means (C - B) ± SEM	-114.3 ± 33.09
	95% confidence interval	-135.9 to 113.4		95% confidence interval	-226.2 to -85.57		95% confidence interval	-206.1 to -22.42
	R squared (eta squared)	0.01552		R squared (eta squared)	0.9045		R squared (eta squared)	0.7489
	F test to compare variances			F test to compare variances			F test to compare variances
	F, DFn, Dfd	2.616, 2, 2		F, DFn, Dfd	6.681, 2, 2		F, DFn, Dfd	1.038, 2, 2
	P value	0.5531		P value	0.2604		P value	0.9814
	P value summary	ns		P value summary	ns		P value summary	ns
	Significantly different (P < 0.05)?	No		Significantly different (P < 0.05)?	No		Significantly different (P < 0.05)?	No
	Data analyzed			Data analyzed			Data analyzed
	Sample size, column A	3		Sample size, column A	3		Sample size, column B	3
	Sample size, column B	3		Sample size, column C	3		Sample size, column C	3

## Sheet: TFAM foci per germline stats
	Table Analyzed	TFAM / germline		Table Analyzed	TFAM / germline		Table Analyzed	TFAM / germline
	Column B	L1		Column C	early L1		Column D	mid L1
	vs.	vs.		vs.	vs.		vs.	vs.
	Column A	emb		Column B	L1		Column C	early L1
	Unpaired t test			Unpaired t test			Unpaired t test
	P value	<0.0001		P value	<0.0001		P value	<0.0001
	P value summary	****		P value summary	****		P value summary	****
	Significantly different (P < 0.05)?	Yes		Significantly different (P < 0.05)?	Yes		Significantly different (P < 0.05)?	Yes
	One- or two-tailed P value?	Two-tailed		One- or two-tailed P value?	Two-tailed		One- or two-tailed P value?	Two-tailed
	t, df	t=23.94, df=4		t, df	t=27.58, df=4		t, df	t=18.24, df=4
	How big is the difference?			How big is the difference?			How big is the difference?
	Mean of column A	220.7		Mean of column B	95.47		Mean of column C	193.7
	Mean of column B	95.47		Mean of column C	193.7		Mean of column D	258.2
	Difference between means (B - A) ± SEM	-125.2 ± 5.229		Difference between means (C - B) ± SEM	98.19 ± 3.560		Difference between means (D - C) ± SEM	64.51 ± 3.537
	95% confidence interval	-139.7 to -110.7		95% confidence interval	88.31 to 108.1		95% confidence interval	54.69 to 74.33
	R squared (eta squared)	0.9931		R squared (eta squared)	0.9948		R squared (eta squared)	0.9881
	F test to compare variances			F test to compare variances			F test to compare variances
	F, DFn, Dfd	1.261, 2, 2		F, DFn, Dfd	20.86, 2, 2		F, DFn, Dfd	20.57, 2, 2
	P value	0.8845		P value	0.0915		P value	0.0927
	P value summary	ns		P value summary	ns		P value summary	ns
	Significantly different (P < 0.05)?	No		Significantly different (P < 0.05)?	No		Significantly different (P < 0.05)?	No
	Data analyzed			Data analyzed			Data analyzed
	Sample size, column A	3		Sample size, column B	3		Sample size, column C	3
	Sample size, column B	3		Sample size, column C	3		Sample size, column D	3
	Table Analyzed	TFAM / germline		Table Analyzed	TFAM / germline
	Column E	Late L1		Column F	L2
	vs.	vs.		vs.	vs.
	Column D	mid L1		Column E	late L1
	Unpaired t test			Unpaired t test
	P value	<0.0001		P value	0.0005
	P value summary	****		P value summary	***
	Significantly different (P < 0.05)?	Yes		Significantly different (P < 0.05)?	Yes
	One- or two-tailed P value?	Two-tailed		One- or two-tailed P value?	Two-tailed
	t, df	t=23.94, df=4		t, df	t=10.28, df=4
	How big is the difference?			How big is the difference?
	Mean of column D	258.2		Mean of column E	370.3
	Mean of column E	370.3		Mean of column F	1126
	Difference between means (E - D) ± SEM	112.1 ± 4.683		Difference between means (F - E) ± SEM	755.2 ± 73.50
	95% confidence interval	99.09 to 125.1		95% confidence interval	551.2 to 959.3
	R squared (eta squared)	0.9931		R squared (eta squared)	0.9635
	F test to compare variances			F test to compare variances
	F, DFn, Dfd	1.193, 2, 2		F, DFn, Dfd	539.2, 2, 2
	P value	0.9121		P value	0.0037
	P value summary	ns		P value summary	**
	Significantly different (P < 0.05)?	No		Significantly different (P < 0.05)?	Yes
	Data analyzed			Data analyzed
	Sample size, column D	3		Sample size, column E	3
	Sample size, column E	3		Sample size, column F	3

## Sheet: PGC counts (TFAM-GFP11)
	early-L1 (fed 6 hrs @23C) PGC counts:				mid-L1 (fed 9 hrs @20C) PGC counts:				Late-L1 (fed 12 hrs @23C) PGC counts:				L2 (fed 24 hrs @23C) PGC counts:
	2021-01-12	2021-01-13	2021-01-15		2021-01-18	2021-01-22	2021-02-03		2021-01-19	2021-01-20	2021-02-02		2021-09-22	2021-10-06	2021-10-13
	3	2	3		5	5	5		6	7	8		18	20	20
	3	2	3		4	5	4		6	7	7		24	18	22
	2	3	3		4	5	5		6	6	6		22	20	20
	3	3	2		4	5	5		6	6	6		24	22	22
	3	2	3		4	4	5		7	6	7		30	16	24
	2	2	2		5	4	5		8	7	7		24	26	20
	2	2	2		5	4	4		6	6	6		20	28	18
	2	3	2		4	4	4		6	6	6		22	18	18
	2	2	2		5	4	4		6	6	6		22	20	22
	3	2	2		4	5	4		6	6	6		26	22	22
	2	2	2		4	4	4		6	7	7		20	28	18
	2	2	2		4	4	5		7	8	6		24	20	22
	3	2	3		4	4	5		7	6	6		26	26	24
	2	2	3		5	4	4		6	6	6		20		20
	2	3	2		4	5	4		8	6	7		26		26
	2	3	2		5	4	4		6	6	7		18		26
	3	2	2		4	5	4		6	6	6		22		20
	2	3	2		4	4	4		6	6	6		24		20
	3	2	3		4	4			6	6	6		30		22
	2	2	3		4	4			6	7			24		14
	3	2	2		4	4			6	6			26		16
	2	2	2			4				8			32		22
	2	2				4				7			18
	3	2								6			26
	2	3								6
	2	2								6
	3	2
	3	2
	2	3
	2	2
	2	3
	2	3
	2	2
	2
	2
	Mean 1:	Mean 2:	Mean 3:		Mean 1:	Mean 2:	Mean 3:		Mean 1:	Mean 2:	Mean 3:		Mean 1:	Mean 2:	Mean 3:
	2.34286	2.30303	2.36364		4.28571	4.30435	4.38889		6.33333	6.38462	6.42105		23.6667	21.8462	20.8182
	Descriptive Statistics:				Descriptive Statistics:				Descriptive Statistics:				Descriptive Statistics:
	Mean	2.337			Mean	4.326			Mean	6.38			Mean	22.11
	Std. Deviation	0.0308			Std. Deviation	0.05498			Std. Deviation	0.04407			Std. Deviation	1.443
	Std. Error of Mean	0.01778			Std. Error of Mean	0.03174			Std. Error of Mean	0.02544			Std. Error of Mean	0.8328

## Sheet: sorted cell mtDNAs
		**Sorted embryo PGCs**								Sorted mid-L1 PGCs (fed 12hrs @ 20C)
		2020-09-24		2020-09-28		2020-10-02				2021-02-25		2021-03-03		2021-03-04
		mtDNAs / germline	mtDNAs / cell	mtDNAs / germline	mtDNAs / cell	mtDNAs / germline	mtDNAs / cell			mtDNAs / germline	mtDNAs / cell	mtDNAs / germline	mtDNAs / cell	mtDNAs / germline	mtDNAs / cell
		846.957	423.478	770.446	385.223	928.264	464.132			620.769	155.192	717.913	179.478	855	213.75
		791.608	395.804	711.006	355.503	803.556	401.778			632.769	158.192	862.667	215.667	829.565	207.391
		797.73	398.865	805.405	402.703	769.275	384.638			685.5	171.375	790.857	197.714	804.96	201.24
		Germline mean 1:	Cell mean 1:	Germline mean 1:	Cell mean 1:	Germline mean 1:	Cell mean 1:			Germline mean 1:	Cell mean 1:	Germline mean 1:	Cell mean 1:	Germline mean 1:	Cell mean 1:
		812.098	406.049	762.286	381.143	833.698	416.849			646.346	161.587	790.479	197.62	829.842	207.46
		**DATA from fig 2 for comaprison**
			Descriptive Statistics:	mtDNAs / germline	mtDNAs / cell						Descriptive Statistics:	mtDNAs / germline	mtDNAs / cell
			Mean	802.7	401.3						Mean	755.6	188.9
			Std. Deviation	36.62	18.31						Std. Deviation	96.6	24.15
			Std. Error of Mean	21.14	10.57						Std. Error of Mean	55.77	13.94
		**Sorted L1 PGCs**								Sorted L2 PGCs (fed 24hrs @ 20C)
		2020-09-22		2020-09-25		2020-09-29				2021-11-03		2021-11-05		2021-11-10
		mtDNAs / germline	mtDNAs / cell	mtDNAs / germline	mtDNAs / cell	mtDNAs / germline	mtDNAs / cell			mtDNAs / germline	mtDNAs / cell	mtDNAs / germline	mtDNAs / cell	mtDNAs / germline	mtDNAs / cell
		495.135	247.568	477.857	238.929	436.505	218.252			3847.5	213.75	6114.46	339.692	3390.43	188.357
		389.143	194.571	456.949	228.475	377.627	188.814			3048.39	169.355	3529.64	196.091	3276	182
		409.091	204.545	522.308	261.154	408	204			2818.12	156.562	4555.06	253.059	4172.73	231.818
		Germline mean 1:	Cell mean 1:	Germline mean 1:	Cell mean 1:	Germline mean 1:	Cell mean 1:			Germline mean 1:	Cell mean 1:	Germline mean 1:	Cell mean 1:	Germline mean 1:	Cell mean 1:
		431.123	215.561	485.705	242.852	407.377	203.689			3238	179.889	4733.05	262.947	3613.05	200.725
		**DATA from fig 2 for comaprison**
			Descriptive Statistics:	mtDNAs / germline	mtDNAs / cell						Descriptive Statistics:	mtDNAs / germline	mtDNAs / cell
			Mean	441.4	220.7						Mean	3861	214.5
			Std. Deviation	40.16	20.08						Std. Deviation	777.8	43.21
			Std. Error of Mean	23.19	11.59						Std. Error of Mean	449.1	24.95
		**Sorted nop-1 embryo PGCs**								Sorted nop-1 mid L1 PGCs (fed 12hrs @ 20C)
		2021-02-25		2021-03-03		2021-03-04				2022-07-13		2022-07-20		2022-07-21
		mtDNAs / germline	mtDNAs / cell	mtDNAs / germline	mtDNAs / cell	mtDNAs / germline	mtDNAs / cell			mtDNAs / germline	mtDNAs / cell	mtDNAs / germline	mtDNAs / cell	mtDNAs / germline	mtDNAs / cell
		697.778	348.889	688	344	726.316	363.158			930.286	211.429	686.4	156	851.4	193.5
		630.476	315.238	703.673	351.837	786.286	393.143			1328.8	302	570.581	129.677	816	185.455
		688.421	344.211	668.936	334.468	686	343			707.52	160.8	679.556	154.444	1064.25	241.875
		Germline mean 1:	Cell mean 1:	Germline mean 1:	Cell mean 1:	Germline mean 1:	Cell mean 1:			Germline mean 1:	Cell mean 1:	Germline mean 1:	Cell mean 1:	Germline mean 1:	Cell mean 1:
		672.225	336.113	686.87	343.435	732.867	366.434			988.869	224.743	645.512	146.707	910.55	206.943
		**DATA from fig 2 for comaprison**
			Descriptive Statistics:	mtDNAs / germline	mtDNAs / cell						Descriptive Statistics:	mtDNAs / germline	mtDNAs / cell
			Mean	697.3	348.7						Mean	848.3	192.8
			Std. Deviation	31.64	15.82						Std. Deviation	179.9	40.9
			Std. Error of Mean	18.27	9.135						Std. Error of Mean	103.9	23.61
		**Sorted nop-1 L1 PGCs**								Sorted nop-1 L2 PGCs (fed 24hrs @ 20C)
		2020-09-22		2020-09-25		2020-09-29				2021-11-24		2021-12-02		2021-12-03
		mtDNAs / germline	mtDNAs / cell	mtDNAs / germline	mtDNAs / cell	mtDNAs / germline	mtDNAs / cell			mtDNAs / germline	mtDNAs / cell	mtDNAs / germline	mtDNAs / cell	mtDNAs / germline	mtDNAs / cell
		725.854	362.927	605.128	302.564	597.5	298.75			3118.24	164.118	2946.34	155.07	1864.11	98.1111
		712.195	356.098	514.783	257.391	503.158	251.579			2592	136.421	7682.61	404.348	1966.5	103.5
		656	328	699.429	349.714	513.333	256.667			3924.23	206.538	3793.45	199.655	3152.81	165.938
		Germline mean 1:	Cell mean 1:	Germline mean 1:	Cell mean 1:	Germline mean 1:	Cell mean 1:			Germline mean 1:	Cell mean 1:	Germline mean 1:	Cell mean 1:	Germline mean 1:	Cell mean 1:
		698.016	349.008	606.446	303.223	537.997	268.999			3211.49	169.026	4807.46	253.024	2327.81	122.516
		**DATA from fig 2 for comaprison**
			Descriptive Statistics:	mtDNAs / germline	mtDNAs / cell						Descriptive Statistics:	mtDNAs / germline	mtDNAs / cell
			Mean	614.2	307.1						Mean	3449	181.5
			Std. Deviation	80.29	40.14						Std. Deviation	1257	66.15
			Std. Error of Mean	46.35	23.18						Std. Error of Mean	725.6	38.19

## Sheet: PGC counts (cell sorts)
	WT mid-L1 (fed 12 hrs @20C) PGC counts:				WT L2 (fed 24 hrs @20C) PGC counts:				nop-1 mid L1 (fed 24 hrs @20C) PGC counts:				nop-1 L2 (fed 24 hrs @20C) PGC counts:
	2021-02-25	2021-03-03	2021-03-04		2021-11-03	2021-11-05	2021-11-10		2022-07-13	2022-07-20	2022-07-21		2021-11-24	2021-12-02	2021-12-03
	5	5	3		24	20	24		3	4	5		32	16	10
	5	4	3		22	16	12		6	7	3		30	18	14
	4	3	3		18	22	22		4	4	3		22	24	20
	3	3	5		26	16	16		4	3	5		24	20	20
	4	4	4		18	22	16		4	5	4		22	22	16
	4	4	5		10	30	14		7	4	5		26	20	12
	6	4	4		16	28	8		5	5	4		18	32	14
	4	2	4		16	28	10		4	4	4		26	20	14
	4	4	3		22	16	22		5	5	4		6	18	16
	3	5	2		18	24	16		6	4	3		12	20	24
	6	4	4		14	26	10		4	5	6		20	12	20
	6	6	6		16	10	18		3	4	4		26	14	10
	3	4	5		12	12	12		5	8	4		24	18	24
	6	4	4		20	24	16		5	4	4		22	14	20
	4	3	4		16	20	18		7	5	3		18	22	18
	5	2	3		22	18	12		4	4	2		26	16	14
	3	4	4		12	20	16		4	4	4		12	28	24
	3	4	4		26	24	16		8	4	5		16	18	14
	5	2	5		16	22	16		4	6	4		18	18	24
	3	4	6		18	16	14		5	4	2		24	16	12
	5	3	3		20	10	16		4	3	5		26	20	12
	4	4	4		10	20	14		4	7	3		20	24	22
	4	4	4		24	18	14		8	4	4		16	16	28
	2	4	3		28	22	12		4	6	5		14	22	22
	3	3	4		14	14	20		3	3	4		18	18	20
	4	2	4		14	18	26		4	8	3		20	16	24
	4	4	4		18	8	12		4	2	4		20	24	32
	5	4	5		18	18	16		4	5	4		14	16	20
	5	4	4		16	10	22		7	3	2		16	22	24
	6	5	4		40	16	18		5	7	5		18	24	14
	4	4	4		14	18	10		4	5	4		18	18	14
	4	3	4		20	18	22		4	3	3		26	14	20
	4	5	4		14	20	10		4	4	3		24	22	20
	4	4	3		12	10	22		5	6	5		16	20	16
	2	3	6		14	20	22		4	5	5		16	18	18
	4	4	3		20	22	18		4	2	3		16	10	20
	4	4	4		10	16	12		4	5	5		10	14	18
	4	2	5		28	16	14		3	4	3		8	18	14
	3	4	4		12	20	14		7	5	4		10		16
	5	4	5		22	24	12		4	7	4		18		24
	4	4	5			14	24		3	4	3		14		16
	4	3	3			14	16		4	4	4		22		24
	4	4	5			18	20		4	5	2		20		36
	4	4	4			20	12		5	4	7		20		12
	4	3	4			10	16		3	2	3		8		16
	5	4	4			12	16		4	8	7		18		16
	5	5	5			16			4	3	4		18
	5	4	4						4	4	3
	3	4	3		Mean 1:	Mean 2:	Mean 3:		5	5	5		Mean 1:	Mean 2:	Mean 3:
	4	4	4		18.25	18.2128	16.0435		4	4	2		18.8936	19	18.6522
	4	4	4						10	3	4
	5	3	4						3	4	4
	5	4	5		Descriptive Statistics:				6	4	2		Descriptive Statistics:
	4	4	4		Mean	17.5			6	4	2		Mean	18.85
	5	6	4		Std. Deviation	1.263			4	6	3		Std. Deviation	0.1782
	5	4	4		Std. Error of Mean	0.7294			5	5	4		Std. Error of Mean	0.1029
	4	2	3							4	5
	3	4	4							4	2
	4	4	4							4	3
	5	4	5							5	2
	5	4	3							7	2
	3	4	4							5	4
	4	3	4							4	3
	5	4	4							8	5
	4	4	3								4
	4	6	5								5
	4	4	2								4
	4	4	6								7
	4	4	4								5
	4	4	5								3
	5	5	4
	3	4	4						Mean 1:	Mean 2:	Mean 3:
	3	4	5						4.66071	4.64062	3.84286
	5	3	4
	6	4	3
	3	4	2						Descriptive Statistics:
	2	5	4						Mean	4.381
	4	4	5						Std. Deviation	0.4665
	4	3	6						Std. Error of Mean	0.2693
	3	5	2
	4	4	2
	5	4	3
	5	4	5
	4	4	4
	5	4	5
	4	4	4
	4	4	4
	5	5	4
	3	5	4
	4	4	3
	4	4
	4	4
	6	4
	4	3
	5	4
	5	5
	4	4
	2	4
		3
		5
		3
	Mean1:	Mean 2:	Mean 3:
	4.16327	3.90099	4.01111
	Descriptive Statistics:
	Mean	4.025
	Std. Deviation	0.1317
	Std. Error of Mean	0.07604
