# Supplementary material for: Independent regulation of mitochondrial DNA quantity and quality in Caenorhabditis elegans primordial germ cells
Source: eLife. 2022 Oct 6;11:e80396. doi: 10.7554/eLife.80396 (PMC9536838; doi:10.7554/eLife.80396)
Supplement: Figure 4—figure supplement 1—source data 1. [file elife-80396-fig4-figsupp1-data1.xlsx]

## Sheet: mptDf2 copy number
	PGC mtDNAs
	mptDf2 PGC mtDNAs:												two-tailed unpaired t-test:
		EMB PGCs				L1 PGCs
	2020-09-24	2020-09-28	2020-10-02		2020-09-22	2020-09-25	2020-09-29						Column B	mptDf2 L1 PGCs
	544.242	635.385	504.242		294.4	262.4	242.353						vs.	vs.
	433.939	538.667	648		283.2	192.941	273.103						Column A	mptDf2 emb PGCs
	436.098	456.667	425.556		251.429	230	260.317
								Descriptive statistics:	emb	L1			Unpaired t test
								Mean	513.6	254.5			P value	0.0006
	Mean 1:	Mean 2:	Mean 3:		Mean 1:	Mean 2:	Mean 3:	Std. Deviation	37.61	24.21			P value summary	***
	471.426	543.573	525.933		276.343	228.447	258.591	Std. Error of Mean	21.71	13.98			Significantly different (P < 0.05)?	Yes
													One- or two-tailed P value?	Two-tailed
													t, df	t=10.04, df=4
													How big is the difference?
													Mean of column A	513.6
													Mean of column B	254.5
													Difference between means (B - A) ± SEM	-259.2 ± 25.83
													95% confidence interval	-330.9 to -187.5
													R squared (eta squared)	0.9618
													F test to compare variances
													F, DFn, Dfd	2.413, 2, 2
													P value	0.5861
													P value summary	ns
													Significantly different (P < 0.05)?	No
													Data analyzed
													Sample size, column A	3
													Sample size, column B	3

## Sheet: mptDf2 heteroplasmy
	mptDf2 PGC heteroplasmy:											two-tailed piared t-test:
		EMB PGCs				L1 PGCs
	2020-11-23	2020-12-01	2020-12-03		2020-11-24	2020-12-02	2020-12-04					Column B	% mptDf2 in L1 PGCs
	74.4995	69.8424	68.9655		70.7375	66.6667	66.1041					vs.	vs.
	73.7252	70.7478	69.6826		70.418	69.4301	66.0229					Column A	% mptDf2 in emb PGCs
	72.9235	69.395	69.4909		71.9298	66.5	66.074
								Descriptive statistics:	emb	L1		Paired t test
								Mean	71.03	68.21		P value	0.008
	Mean 1:	Mean 2:	Mean 3:		Mean 1:	Mean 2:	Mean 3:	Std. Deviation	2.346	2.549		P value summary	**
	73.7161	69.9951	69.3797		71.0284	67.5322	66.067	Std. Error of Mean	1.355	1.472		Significantly different (P < 0.05)?	Yes
												One- or two-tailed P value?	Two-tailed
												t, df	t=11.10, df=2
												Number of pairs	3
												How big is the difference?
												Mean of differences (B - A)	-2.821
												SD of differences	0.4404
												SEM of differences	0.2542
												95% confidence interval	-3.915 to -1.727
												R squared (partial eta squared)	0.984
												How effective was the pairing?
												Correlation coefficient (r)	0.9872
												P value (one tailed)	0.0509
												P value summary	ns
												Was the pairing significantly effective?	No

## Sheet: mptDf2 proportion
	WT proportion mtDNAs:								Two-tailed unpaired t-test:
		EMB PGCs
	exp1	exp2	exp3						Column B	Data Set-B
	0.584605	0.620235	0.470238						vs.	vs.
	0.491585	0.64268	0.469945						Column A	Data Set-A
	0.512818	0.648503	0.530369
					Descriptive statistics:				Unpaired t test
					Mean	0.5523			P value	0.5187
	Mean 1:	Mean 2:	Mean 3:		Std. Deviation	0.07605			P value summary	ns
	0.52967	0.637139	0.490184		Std. Error of Mean	0.04391			Significantly different (P < 0.05)?	No
									One- or two-tailed P value?	Two-tailed
									t, df	t=0.7068, df=4
	mptDf2 proportion mtDNAs:								How big is the difference?
		EMB PGCs							Mean of column A	0.5523
	exp1	exp2	exp3						Mean of column B	0.5065
	0.540935	0.412978	0.480628						Difference between means (B - A) ± SEM	-0.04581 ± 0.06481
	0.652626	0.358183	0.421456						95% confidence interval	-0.2258 to 0.1341
	0.576542	0.50365	0.611712						R squared (eta squared)	0.111
					Descriptive statistics:
					Mean	0.5065			F test to compare variances
	Mean 1:	Mean 2:	Mean 3:		Std. Deviation	0.08257			F, DFn, Dfd	1.179, 2, 2
	0.590034	0.424937	0.504599		Std. Error of Mean	0.04767			P value	0.918
									P value summary	ns
									Significantly different (P < 0.05)?	No
									Data analyzed
									Sample size, column A	3
									Sample size, column B	3
