# Supplementary material for: Independent regulation of mitochondrial DNA quantity and quality in Caenorhabditis elegans primordial germ cells
Source: eLife. 2022 Oct 6;11:e80396. doi: 10.7554/eLife.80396 (PMC9536838; doi:10.7554/eLife.80396)
Supplement: Figure 4—source data 1. [file elife-80396-fig4-data1.xlsx]

## Sheet: uaDf5 copy number analysis
	uaDf5 PGC mtDNAs:
		EMB PGCs				L1 PGCs							Unpaired Two tailed t-test:			Unpaired Two tailed t-test:
	2020-11-23	2020-12-01	2020-12-03		2020-11-24	2020-12-02	2020-12-04
	385.778	374.694	406.512		197.647	140.513	151.25						Column B	uaDf5 L1 PGC mtDNAs		Column D	uaDf5; nop-1 L1 PGC mtDNAs
	381.739	299.016	340.8		152.558	177.5	238						vs.	vs.		vs.	vs.
	480	463.415	355.918		237.143	173.75	195.2						Column A	uaDf5 emb PGC mtDNAs		Column C	uaDf5: nop-1 emb PGC mtDNAs
								Descriptive statistics:	emb	L1
								Mean	387.5	184.8			Unpaired t test			Unpaired t test
	Mean 1:	Mean 2:	Mean 3:		Mean 1:	Mean 2:	Mean 3:	Std. Deviation	25.15	18.12			P value	0.0003		P value	0.7381
	415.839	379.042	367.743		195.783	163.921	194.817	Std. Error of Mean	14.52	10.46			P value summary	***		P value summary	ns
													Significantly different (P < 0.05)?	Yes		Significantly different (P < 0.05)?	No
													One- or two-tailed P value?	Two-tailed		One- or two-tailed P value?	Two-tailed
	nop-1; uaDf5 PGC mtDNAs:												t, df	t=11.33, df=4		t, df	t=0.3584, df=4
		EMB PGCs				L1 PGCs
	2021-01-21	2021-01-25	2021-02-08		2021-02-03	2021-02-11	2021-02-18						How big is the difference?			How big is the difference?
	297.872	385.714	380		385.882	275.2	444.211						Mean of column A	387.5		Mean of column C	380
	306.364	318.4	424.211		415	407.059	284.138						Mean of column B	184.8		Mean of column D	389.6
	517.037	371.818	418.462		425	352	517.647						Difference between means (B - A) ± SEM	-202.7 ± 17.90		Difference between means (D - C) ± SEM	9.584 ± 26.74
								Descriptive statistics:	emb	L1			95% confidence interval	-252.4 to -153.0		95% confidence interval	-64.66 to 83.82
								Mean	380	389.6			R squared (eta squared)	0.9698		R squared (eta squared)	0.03112
	Mean 1:	Mean 2:	Mean 3:		Mean 1:	Mean 2:	Mean 3:	Std. Deviation	25.04	38.96
	373.758	358.644	407.557		408.627	344.753	415.332	Std. Error of Mean	14.46	22.49			F test to compare variances			F test to compare variances
													F, DFn, Dfd	1.926, 2, 2		F, DFn, Dfd	2.420, 2, 2
													P value	0.6836		P value	0.5848
													P value summary	ns		P value summary	ns
													Significantly different (P < 0.05)?	No		Significantly different (P < 0.05)?	No
													Data analyzed			Data analyzed
													Sample size, column A	3		Sample size, column C	3
													Sample size, column B	3		Sample size, column D	3

## Sheet: uaDf5 heteroplasmy
	uaDf5 PGC heteroplasmy:
		EMB PGCs				L1 PGCs							Paired Two tailed t-test:			Paired Two tailed t-test:
	2020-11-23	2020-12-01	2020-12-03		2020-11-24	2020-12-02	2020-12-04
	47.3146	48.6936	47.9714		41.4369	43.7322	43.5456						Column B	uaDf5 L1 PGC mtDNAs		Column D	uaDf5; nop-1 L1 PGC mtDNAs
	46.75	47.3441	48.8095		43.0282	44.1022	43.0638						vs.	vs.		vs.	vs.
	49.2574	47.2813	49.2788		43.5325	44.8062	44.386						Column A	uaDf5 emb PGC mtDNAs		Column C	uaDf5: nop-1 emb PGC mtDNAs
								Descriptive statistics:	emb	L1
								Mean	48.08	43.51			Paired t test			Paired t test
	Mean 1:	Mean 2:	Mean 3:		Mean 1:	Mean 2:	Mean 3:	Std. Deviation	0.5272	0.7847			P value	0.0119		P value	0.0058
	47.774	47.773	48.6866		42.6658	44.2135	43.6651	Std. Error of Mean	0.3044	0.4531			P value summary	*		P value summary	**
													Significantly different (P < 0.05)?	Yes		Significantly different (P < 0.05)?	Yes
													One- or two-tailed P value?	Two-tailed		One- or two-tailed P value?	Two-tailed
	nop-1; uaDf5 PGC heteroplasmy:												t, df	t=9.083, df=2		t, df	t=13.11, df=2
		EMB PGCs				L1 PGCs							Number of pairs	3		Number of pairs	3
	2021-01-21	2021-01-25	2021-02-08		2021-02-03	2021-02-11	2021-02-18
	46.7456	44.389	44.6701		41.5973	40.0631	40.7094						How big is the difference?			How big is the difference?
	43.6533	44.2159	42.8954		37.138	41.8361	40.3905						Mean of differences (B - A)	-4.563		Mean of differences (D - C)	-4.002
	43.75	44.3005	44.1253		41.7349	39.185	40.0693						SD of differences	0.8702		SD of differences	0.5289
								Descriptive statistics:	emb	L1			SEM of differences	0.5024		SEM of differences	0.3054
								Mean	44.31	40.3			95% confidence interval	-6.725 to -2.401		95% confidence interval	-5.316 to -2.689
	Mean 1:	Mean 2:	Mean 3:		Mean 1:	Mean 2:	Mean 3:	Std. Deviation	0.4097	0.1271			R squared (partial eta squared)	0.9763		R squared (partial eta squared)	0.9885
	44.7163	44.3018	43.8969		40.1567	40.3614	40.3898	Std. Error of Mean	0.2365	0.0734
													How effective was the pairing?			How effective was the pairing?
													Correlation coefficient (r)	0.1649		Correlation coefficient (r)	-0.9191
													P value (one tailed)	0.4473		P value (one tailed)	0.1289
													P value summary	ns		P value summary	ns
													Was the pairing significantly effective?	No		Was the pairing significantly effective?	No

## Sheet: Heteroplasmy shifts
	uaDf5 heteroplasmy shifts:							Unpaired Two tailed t-test:
		EMB PGCs
	2020-11-23	2020-12-01	2020-12-03					Column B	uaDf5
	-5.87771	-4.96139	-4.42575					vs.	vs.
	-3.72183	-3.24193	-5.74569					Column A	uaDf5; nop-1
	-5.72492	-2.47512	-4.89288
				Descriptive statistics:				Unpaired t test
				Mean	-4.563			P value	0.3943
	Mean 1:	Mean 2:	Mean 3:	Std. Deviation	0.8702			P value summary	ns
	-5.10816	-3.55948	-5.02144	Std. Error of Mean	0.5024			Significantly different (P < 0.05)?	No
								One- or two-tailed P value?	Two-tailed
								t, df	t=0.9536, df=4
	nop-1; uaDf5 heteroplasmy shift:
		EMB PGCs						How big is the difference?
	2021-01-21	2021-01-25	2021-02-08					Mean of column A	-4.563
	-5.14822	-4.32594	-3.96068					Mean of column B	-4.002
	-6.51526	-2.37983	-2.5049					Difference between means (B - A) ± SEM	0.5606 ± 0.5879
	-2.01514	-5.11557	-4.05599					95% confidence interval	-1.072 to 2.193
				Descriptive statistics:				R squared (eta squared)	0.1852
				Mean	-4.002
	Mean 1:	Mean 2:	Mean 3:	Std. Deviation	0.5289			F test to compare variances
	-4.55954	-3.94044	-3.50719	Std. Error of Mean	0.3054			F, DFn, Dfd	2.707, 2, 2
								P value	0.5395
								P value summary	ns
								Significantly different (P < 0.05)?	No
								Data analyzed
								Sample size, column A	3
								Sample size, column B	3

## Sheet: % uaDf5 during development
		% uaDf5 PGC heteroplasmy:
			Whole embryo homogenate:					EMB PGCs				L1 PGCs			mid-L1 GSCs					L2 GSCs			Whole adults
			2020-11-23	2020-12-01	2020-12-03		2020-11-23	2020-12-01	2020-12-03		2020-11-24	2020-12-02	2020-12-04		2021-05-12	2021-05-13	2021-05-19		2021-08-04	2021-08-10	2021-08-17		2021-08-08	2021-08-15	2021-08-16
			49.1214	50.3314	47.3896		47.3146	48.6936	47.9714		41.4369	43.7322	43.5456		41.1466	44.2544	41.1952		53.2086	51.0246	49.3416		55.7055	52.0042	54.7786
			49.6504	48.8498	46.5955		46.75	47.3441	48.8095		43.0282	44.1022	43.0638		42.6323	45.5571	37.7069		51.4045	56.25	49.6552		53.4615	54.719	56.6221
			49.7982	50.9587	48.9522		49.2574	47.2813	49.2788		43.5325	44.8062	44.386		43.6364	44.9802	38.5566		56.8116	56.9915	48.36		53.2199	54.9892	50.4232
			Mean 1:	Mean 2:	Mean 3:		Mean 1:	Mean 2:	Mean 3:		Mean 1:	Mean 2:	Mean 3:		Mean 1:	Mean 2:	Mean 3:		Mean 1:	Mean 2:	Mean 3:		Mean 1:	Mean 2:	Mean 3:
			49.5233	50.0466	47.6458		47.774	47.773	48.6866		42.6658	44.2135	43.6651		42.4718	44.9306	39.1529		53.8082	54.7554	49.1189		54.129	53.9041	53.9413
			Descriptive Statistics:	Whole emb			Descriptive Statistics:	emb PGCs			Descriptive Statistics:	L1 PGCs			Descriptive Statistics:	mid-L1 GSCs			Descriptive Statistics:	L2 GSCs			Descriptive Statistics:	Whole Adults
			Mean	49.07			Mean	48.08			Mean	43.51			Mean	42.19			Mean	52.56			Mean	53.99
			Std. Deviation	1.262			Std. Deviation	0.5272			Std. Deviation	0.7847			Std. Deviation	2.899			Std. Deviation	3.018			Std. Deviation	0.1205
			Std. Error of Mean	0.7289			Std. Error of Mean	0.3044			Std. Error of Mean	0.4531			Std. Error of Mean	1.674			Std. Error of Mean	1.743			Std. Error of Mean	0.06958
		Paired two-tailed t-test:				Paired two-tailed t-test:				unpaired two-tailed t-test				Paired two-tailed t-test:				unpaired two-tailed t-test				unpaired two-tailed t-test				unpaired two-tailed t-test				unpaired two-tailed t-test				unpaired two-tailed t-test				unpaired two-tailed t-test				unpaired two-tailed t-test
		Column B	EMB PGCs			Column C	L1 PGCs			Column D	mid-L1			Column C	L1 PGCs			Column D	mid-L1			Column D	mid-L1			Column E	L2			Column F	Adult			Column E	L2			Column F	Adult			Column F	Adult
		vs.	vs.			vs.	vs.			vs.	vs.			vs.	vs.			vs.	vs.			vs.	vs.			vs.	vs.			vs.	vs.			vs.	vs.			vs.	vs.			vs.	vs.
		Column A	Whole emb			Column A	Whole emb			Column A	Whole emb			Column B	EMB PGCs			Column B	EMB PGCs			Column C	L1 PGCs			Column C	L1 PGCs			Column C	L1 PGCs			Column D	mid-L1			Column D	mid-L1			Column E	L2
		Paired t test				Paired t test				Unpaired t test				Paired t test				Unpaired t test				Unpaired t test				Unpaired t test				Unpaired t test				Unpaired t test				Unpaired t test				Unpaired t test
		P value	0.4358			P value	0.0222			P value	0.0196			P value	0.0119			P value	0.0257			P value	0.486			P value	0.0074			P value	<0.0001			P value	0.0127			P value	0.0021			P value	0.4581
		P value summary	ns			P value summary	*			P value summary	*			P value summary	*			P value summary	*			P value summary	ns			P value summary	**			P value summary	****			P value summary	*			P value summary	**			P value summary	ns
		Significantly different (P < 0.05)?	No			Significantly different (P < 0.05)?	Yes			Significantly different (P < 0.05)?	Yes			Significantly different (P < 0.05)?	Yes			Significantly different (P < 0.05)?	Yes			Significantly different (P < 0.05)?	No			Significantly different (P < 0.05)?	Yes			Significantly different (P < 0.05)?	Yes			Significantly different (P < 0.05)?	Yes			Significantly different (P < 0.05)?	Yes			Significantly different (P < 0.05)?	No
		One- or two-tailed P value?	Two-tailed			One- or two-tailed P value?	Two-tailed			One- or two-tailed P value?	Two-tailed			One- or two-tailed P value?	Two-tailed			One- or two-tailed P value?	Two-tailed			One- or two-tailed P value?	Two-tailed			One- or two-tailed P value?	Two-tailed			One- or two-tailed P value?	Two-tailed			One- or two-tailed P value?	Two-tailed			One- or two-tailed P value?	Two-tailed			One- or two-tailed P value?	Two-tailed
		t, df	t=0.9664, df=2			t, df	t=6.601, df=2			t, df	t=3.772, df=4			t, df	t=9.082, df=2			t, df	t=3.463, df=4			t, df	t=0.7668, df=4			t, df	t=5.024, df=4			t, df	t=22.86, df=4			t, df	t=4.294, df=4			t, df	t=7.047, df=4			t, df	t=0.8203, df=4
		Number of pairs	3			Number of pairs	3							Number of pairs	3
										How big is the difference?								How big is the difference?				How big is the difference?				How big is the difference?				How big is the difference?				How big is the difference?				How big is the difference?				How big is the difference?
		How big is the difference?				How big is the difference?				Mean of column A	49.07			How big is the difference?				Mean of column B	48.08			Mean of column C	43.51			Mean of column C	43.51			Mean of column C	43.51			Mean of column D	42.19			Mean of column D	42.19			Mean of column E	52.56
		Mean of differences (B - A)	-0.9941			Mean of differences (C - A)	-5.557			Mean of column D	42.19			Mean of differences (C - B)	-4.563			Mean of column D	42.19			Mean of column D	42.19			Mean of column E	52.56			Mean of column F	53.99			Mean of column E	52.56			Mean of column F	53.99			Mean of column F	53.99
		SD of differences	1.782			SD of differences	1.458			Difference between means (D - A) ± SEM	-6.887 ± 1.826			SD of differences	0.8702			Difference between means (D - B) ± SEM	-5.893 ± 1.701			Difference between means (D - C) ± SEM	-1.330 ± 1.734			Difference between means (E - C) ± SEM	9.046 ± 1.800			Difference between means (F - C) ± SEM	10.48 ± 0.4584			Difference between means (E - D) ± SEM	10.38 ± 2.416			Difference between means (F - D) ± SEM	11.81 ± 1.675			Difference between means (F - E) ± SEM	1.431 ± 1.744
		SEM of differences	1.029			SEM of differences	0.8419			95% confidence interval	-11.96 to -1.818			SEM of differences	0.5024			95% confidence interval	-10.62 to -1.169			95% confidence interval	-6.145 to 3.485			95% confidence interval	4.047 to 14.04			95% confidence interval	9.204 to 11.75			95% confidence interval	3.667 to 17.08			95% confidence interval	7.155 to 16.46			95% confidence interval	-3.411 to 6.273
		95% confidence interval	-5.420 to 3.432			95% confidence interval	-9.179 to -1.935			R squared (eta squared)	0.7805			95% confidence interval	-6.725 to -2.401			R squared (eta squared)	0.7499			R squared (eta squared)	0.1281			R squared (eta squared)	0.8632			R squared (eta squared)	0.9924			R squared (eta squared)	0.8217			R squared (eta squared)	0.9254			R squared (eta squared)	0.144
		R squared (partial eta squared)	0.3183			R squared (partial eta squared)	0.9561							R squared (partial eta squared)	0.9763
										F test to compare variances								F test to compare variances				F test to compare variances				F test to compare variances				F test to compare variances				F test to compare variances				F test to compare variances				F test to compare variances
		How effective was the pairing?				How effective was the pairing?				F, DFn, Dfd	5.275, 2, 2			How effective was the pairing?				F, DFn, Dfd	30.25, 2, 2			F, DFn, Dfd	13.65, 2, 2			F, DFn, Dfd	14.79, 2, 2			F, DFn, Dfd	42.39, 2, 2			F, DFn, Dfd	1.084, 2, 2			F, DFn, Dfd	578.8, 2, 2			F, DFn, Dfd	627.1, 2, 2
		Correlation coefficient (r)	-0.9785			Correlation coefficient (r)	0.04212			P value	0.3187			Correlation coefficient (r)	0.1649			P value	0.064			P value	0.1365			P value	0.1266			P value	0.0461			P value	0.9599			P value	0.0034			P value	0.0032
		P value (one tailed)	0.0662			P value (one tailed)	0.4866			P value summary	ns			P value (one tailed)	0.4473			P value summary	ns			P value summary	ns			P value summary	ns			P value summary	*			P value summary	ns			P value summary	**			P value summary	**
		P value summary	ns			P value summary	ns			Significantly different (P < 0.05)?	No			P value summary	ns			Significantly different (P < 0.05)?	No			Significantly different (P < 0.05)?	No			Significantly different (P < 0.05)?	No			Significantly different (P < 0.05)?	Yes			Significantly different (P < 0.05)?	No			Significantly different (P < 0.05)?	Yes			Significantly different (P < 0.05)?	Yes
		Was the pairing significantly effective?	No			Was the pairing significantly effective?	No							Was the pairing significantly effective?	No
										Data analyzed								Data analyzed				Data analyzed				Data analyzed				Data analyzed				Data analyzed				Data analyzed				Data analyzed
										Sample size, column A	3							Sample size, column B	3			Sample size, column C	3			Sample size, column C	3			Sample size, column C	3			Sample size, column D	3			Sample size, column D	3			Sample size, column E	3
										Sample size, column D	3							Sample size, column D	3			Sample size, column D	3			Sample size, column E	3			Sample size, column F	3			Sample size, column E	3			Sample size, column F	3			Sample size, column F	3
