# Supplementary material for: Independent regulation of mitochondrial DNA quantity and quality in Caenorhabditis elegans primordial germ cells
Source: eLife. 2022 Oct 6;11:e80396. doi: 10.7554/eLife.80396 (PMC9536838; doi:10.7554/eLife.80396)
Supplement: Figure 5—figure supplement 1—source data 1. [file elife-80396-fig5-figsupp1-data1.xlsx]

## Sheet: PGC mtDNAs
												Unpaired two-tailed t-test:
	dct-1; uaDf5 PGC mtDNAs:
		EMB PGCs				L1 PGCs						Column B	dct-1; uaDf5 L1
	2021-05-24	2021-05-27	2021-06-07		2021-05-25	2021-05-28	2021-06-08					vs.	vs.
	450.286	423.529	461.333		291.667	241.667	201.429					Column A	dct-1; uaDf5 EMB
	414.737	383.158	496.296		253.333	235.2	219.259
	413.684	390.27	419.394		212.941	250	228.8					Unpaired t test
								Descriptive statistics:	emb	L1		P value	0.0007
								Mean	428.1	237.1		P value summary	***
	Mean 1:	Mean 2:	Mean 3:		Mean 1:	Mean 2:	Mean 3:	Std. Deviation	30.05	18.62		Significantly different (P < 0.05)?	Yes
	426.236	398.986	459.008		252.647	242.289	216.496	Std. Error of Mean	17.35	10.75		One- or two-tailed P value?	Two-tailed
												t, df	t=9.355, df=4
												How big is the difference?
												Mean of column C	428.1
												Mean of column D	237.1
												Difference between means (D - C) ± SEM	-190.9 ± 20.41
												95% confidence interval	-247.6 to -134.3
												R squared (eta squared)	0.9563
												F test to compare variances
												F, DFn, Dfd	2.606, 2, 2
												P value	0.5546
												P value summary	ns
												Significantly different (P < 0.05)?	No
												Data analyzed
												Sample size, column C	3
												Sample size, column D	3

## Sheet: Proportion mtDNAs inherited
	uaDf5*** proportion mtDNAs:								Unpaired two-tailed t-test:
		EMB PGCs
	exp1	exp2	exp3						Column B	dct-1; uaDf5
	0.512334	0.375007	0.372068						vs.	vs.
	0.39964	0.593613	0.698357						Column A	uadf5
	0.494048	0.374934	0.54844
					Descriptive statistics:				Unpaired t test
					Mean	0.4854			P value	0.2225
	Mean 1:	Mean 2:	Mean 3:		Std. Deviation	0.1153			P value summary	ns
	0.468674	0.447851	0.539622		Std. Error of Mean	0.03845			Significantly different (P < 0.05)?	No
	*** Data from Fig 5 for comparison ***								One- or two-tailed P value?	Two-tailed
									t, df	t=1.443, df=4
	dct-1; uaDf5 proportion mtDNAs:								How big is the difference?
		EMB PGCs							Mean of column A	0.4854
	exp1	exp2	exp3						Mean of column B	0.558
	0.647737	0.570602	0.436623						Difference between means (B - A) ± SEM	0.07265 ± 0.05034
	0.610829	0.613846	0.441791						95% confidence interval	-0.06712 to 0.2124
	0.514743	0.640582	0.545549						R squared (eta squared)	0.3424
					Descriptive statistics:
					Mean	0.558			F test to compare variances
	Mean 1:	Mean 2:	Mean 3:		Std. Deviation	0.07272			F, DFn, Dfd	2.285, 2, 2
	0.591103	0.608343	0.474654		Std. Error of Mean	0.04199			P value	0.6089
									P value summary	ns
									Significantly different (P < 0.05)?	No
									Data analyzed
									Sample size, column A	3
									Sample size, column B	3

## Sheet: PGC heteroplasmy
	% uaDf5 in dct-1; uaDf5 PGCs:											Paired two-tailed t-test:
		EMB PGCs				L1 PGCs
	2021-05-24	2021-05-27	2021-06-07		2021-05-25	2021-05-28	2021-06-08					Column B	dct-1; uaDf5 L1
	50.4202	52.994	47.1875		44.2857	45.8919	42.4618					vs.	vs.
	50.4298	54.0059	45.8967		47.6945	42.4069	41.6176					Column A	dct-1; uaDf5 EMB
	50.1348	52.3952	47.2393		43.472	44.6043	43.2472
								Descriptive statistics:	emb	L1		Paired t test
								Mean	50.08	43.96		P value	0.0474
	Mean 1:	Mean 2:	Mean 3:		Mean 1:	Mean 2:	Mean 3:	Std. Deviation	3.186	1.385		P value summary	*
	50.3282	53.1317	46.7745		45.1508	44.301	42.4422	Std. Error of Mean	1.839	0.7998		Significantly different (P < 0.05)?	Yes
												One- or two-tailed P value?	Two-tailed
												t, df	t=4.429, df=2
												Number of pairs	3
												How big is the difference?
												Mean of differences (D - C)	-6.113
												SD of differences	2.391
												SEM of differences	1.38
												95% confidence interval	-12.05 to -0.1744
												R squared (partial eta squared)	0.9075
												How effective was the pairing?
												Correlation coefficient (r)	0.7198
												P value (one tailed)	0.2442
												P value summary	ns
												Was the pairing significantly effective?	No
