# Supplementary material for: Independent regulation of mitochondrial DNA quantity and quality in Caenorhabditis elegans primordial germ cells
Source: eLife. 2022 Oct 6;11:e80396. doi: 10.7554/eLife.80396 (PMC9536838; doi:10.7554/eLife.80396)
Supplement: Figure 5—source data 1. [file elife-80396-fig5-data1.xlsx]

## Sheet: PGC mtDNAs
	atg-18; uaDf5 PGC mtDNAs:
		EMB PGCs				L1 PGCs							unpaired Two tailed t-test:			unpaired Two tailed t-test:
	2021-06-17	2021-06-21	2021-06-25		2021-06-18	2021-06-22	2021-06-26
	421.714	378.824	354.419		308.148	270.588	289.655						Column D	atg-18; uaDf5 L1 PGCs		Column F	atg-13; uaDf5 L1 PGCs
	402.222	306.341	394.872		324.615	282.4	203.077						vs.	vs.		vs.	vs.
	414.857	398.71	380		318.491	327.442	225.882						Column C	atg-18; uaDf5 emb PGCs		Column E	atg-13; uaDf5 emb PGCs
								Descriptive statistics:	emb	L1
								Mean	383.6	283.4			Unpaired t test			Unpaired t test
	Mean 1:	Mean 2:	Mean 3:		Mean 1:	Mean 2:	Mean 3:	Std. Deviation	26.55	39.75			P value	0.0222		P value	0.016
	412.931	361.292	376.43		317.085	293.477	239.538	Std. Error of Mean	15.33	22.95			P value summary	*		P value summary	*
													Significantly different (P < 0.05)?	Yes		Significantly different (P < 0.05)?	Yes
													One- or two-tailed P value?	Two-tailed		One- or two-tailed P value?	Two-tailed
	atg-13; uaDf5 PGC mtDNAs:												t, df	t=3.630, df=4		t, df	t=4.011, df=4
		EMB PGCs				L1 PGCs
	2021-10-21	2021-10-28	2021-11-01		2021-02-03	2021-02-11	2021-02-18						How big is the difference?			How big is the difference?
	490.909	522.353	630.4		431.304	425	349.565						Mean of column C	383.6		Mean of column E	525.8
	469.714	515.294	606.4		342.857	410	423.562						Mean of column D	283.4		Mean of column F	418.5
	652.8	419.355	425.143		526.667	477.143	380						Difference between means (D - C) ± SEM	-100.2 ± 27.60		Difference between means (F - E) ± SEM	-107.4 ± 26.77
								Descriptive statistics:	emb	L1			95% confidence interval	-176.8 to -23.56		95% confidence interval	-181.7 to -33.05
								Mean	525.8	418.5			R squared (eta squared)	0.7672		R squared (eta squared)	0.8009
	Mean 1:	Mean 2:	Mean 3:		Mean 1:	Mean 2:	Mean 3:	Std. Deviation	35.7	29.57
	537.808	485.667	553.981		433.609	437.381	384.376	Std. Error of Mean	20.61	17.07			F test to compare variances			F test to compare variances
													F, DFn, Dfd	2.242, 2, 2		F, DFn, Dfd	1.457, 2, 2
													P value	0.6169		P value	0.8139
													P value summary	ns		P value summary	ns
													Significantly different (P < 0.05)?	No		Significantly different (P < 0.05)?	No
													Data analyzed			Data analyzed
													Sample size, column C	3		Sample size, column E	3
													Sample size, column D	3		Sample size, column F	3

## Sheet: Proportion mtDNAs inherited
	uaDf5 proportion mtDNAs:								Unpaired two-tailed t-test:			Unpaired two-tailed t-test:
		EMB PGCs
	exp1	exp2	exp3						Column B	atg-18; uaDf5		Column C	atg-13; uaDf5
	0.512334	0.375007	0.372068						vs.	vs.		vs.	vs.
	0.39964	0.593613	0.698357						Column A	uaDf5		Column A	uaDf5
	0.494048	0.374934	0.54844
					Descriptive statistics:				Unpaired t test			Unpaired t test
					Mean	0.4854			P value	0.0124		P value	0.007
	Mean 1:	Mean 2:	Mean 3:		Std. Deviation	0.1153			P value summary	*		P value summary	**
	0.468674	0.447851	0.539622		Std. Error of Mean	0.03845			Significantly different (P < 0.05)?	Yes		Significantly different (P < 0.05)?	Yes
									One- or two-tailed P value?	Two-tailed		One- or two-tailed P value?	Two-tailed
									t, df	t=4.330, df=4		t, df	t=5.090, df=4
	atg-18; uaDf5 proportion mtDNAs:								How big is the difference?			How big is the difference?
		EMB PGCs							Mean of column A	0.4854		Mean of column A	0.4854
	exp1	exp2	exp3						Mean of column B	0.7432		Mean of column B	0.8121
	0.730704	0.714286	0.817269						Difference between means (B - A) ± SEM	0.2578 ± 0.05955		Difference between means (B - A) ± SEM	0.3268 ± 0.06419
	0.807055	0.921847	0.514286						95% confidence interval	0.09248 to 0.4232		95% confidence interval	0.1485 to 0.5050
	0.767711	0.821254	0.594427						R squared (eta squared)	0.8241		R squared (eta squared)	0.8663
					Descriptive statistics:
					Mean	0.7432			F test to compare variances			F test to compare variances
	Mean 1:	Mean 2:	Mean 3:		Std. Deviation	0.1243			F, DFn, Dfd	3.596, 2, 2		F, DFn, Dfd	4.340, 2, 2
	0.76849	0.819129	0.641994		Std. Error of Mean	0.04145			P value	0.4352		P value	0.3745
									P value summary	ns		P value summary	ns
									Significantly different (P < 0.05)?	No		Significantly different (P < 0.05)?	No
	atg-13; uaDf5 proportion mtDNAs:								Data analyzed			Data analyzed
		EMB PGCs							Sample size, column A	3		Sample size, column A	3
	exp1	exp2	exp3						Sample size, column B	3		Sample size, column B	3
	0.878583	0.813626	0.554513
	0.729927	0.795662	0.698486
	0.806781	1.1378	0.893817
					Descriptive statistics:
					Mean	0.8121
	Mean 1:	Mean 2:	Mean 3:		Std. Deviation	0.1595
	0.805097	0.915697	0.715605		Std. Error of Mean	0.05316

## Sheet: PGC heteroplasmy
	atg-18; uaDf5 heteroplasmy:												Unpaired two-tailed t-test:			Unpaired two-tailed t-test:
		EMB PGCs				L1 PGCs
	2021-06-17	2021-06-21	2021-06-25		2021-06-18	2021-06-22	2021-06-26						Column D	atg-18; uaDf5 L1 PGCs		Column F	atg-13; uaDf5 L1 PGCs
	55.5891	54.7368	55.7143		47.657	47.9233	45.6583						vs.	vs.		vs.	vs.
	56.135	54.4521	54.4669		47.5277	47.0032	45.3637						Column C	atg-18; uaDf5 emb PGCs		Column E	atg-13; uaDf5 emb PGCs
	55.1829	53.7906	55.3936		47.0199	46.9649	46.6815
								Descriptive statistics:	emb	L1			Paired t test			Paired t test
								Mean	55.05	46.87			P value	0.0063		P value	0.0141
	Mean 1:	Mean 2:	Mean 3:		Mean 1:	Mean 2:	Mean 3:	Std. Deviation	0.6658	0.8377			P value summary	**		P value summary	*
	55.6357	54.3265	55.1916		47.4015	47.2971	45.9012	Std. Error of Mean	0.3844	0.4837			Significantly different (P < 0.05)?	Yes		Significantly different (P < 0.05)?	Yes
													One- or two-tailed P value?	Two-tailed		One- or two-tailed P value?	Two-tailed
													t, df	t=12.53, df=2		t, df	t=8.326, df=2
	atg-13; uaDf5 heteroplasmy:												Number of pairs	3		Number of pairs	3
		EMB PGCs				L1 PGCs
	2021-10-21	2021-10-28	2021-11-01		2021-02-03	2021-02-11	2021-02-18						How big is the difference?			How big is the difference?
	56.0976	61.8132	62.6168		48.1297	52.2775	54.6099						Mean of differences (D - C)	-8.185		Mean of differences (F - E)	-7.414
	55.6474	60.9819	62.069		50.6692	51.7241	56.9322						SD of differences	1.131		SD of differences	1.542
	55.2113	60.4396	63.9394		50.8555	52.7581	54.1364						SEM of differences	0.6532		SEM of differences	0.8905
								Descriptive statistics:	emb	L1			95% confidence interval	-11.00 to -5.374		95% confidence interval	-11.25 to -3.582
								Mean	59.87	52.45			R squared (partial eta squared)	0.9874		R squared (partial eta squared)	0.972
	Mean 1:	Mean 2:	Mean 3:		Mean 1:	Mean 2:	Mean 3:	Std. Deviation	3.76	2.676
	55.6521	61.0782	62.8751		49.8848	52.2533	55.2262	Std. Error of Mean	2.171	1.545			How effective was the pairing?			How effective was the pairing?
													Correlation coefficient (r)	-0.1209		Correlation coefficient (r)	0.9402
													P value (one tailed)	0.4614		P value (one tailed)	0.1106
													P value summary	ns		P value summary	ns
													Was the pairing significantly effective?	No		Was the pairing significantly effective?	No

## Sheet: heteroplasmy shift
	atg-18; uaDf5 heteroplasmy shift:							Unpaired Two tailed t-test:			Unpaired Two tailed t-test:
	exp1	exp2	exp3					Column B	atg-18 ; uaDf5		Column C	atg-13 ; uaDf5
	-7.93209	-6.81352	-10.056					vs.	vs.		vs.	vs.
	-8.60722	-7.4489	-9.10317					Column A	uaDf5		Column A	uaDf5
	-8.16306	-6.82576	-8.71205
				Descriptive statistics:				Unpaired t test			Unpaired t test
				Mean	-8.185			P value	0.0117		P value	0.0494
	Mean 1:	Mean 2:	Mean 3:	Std. Deviation	1.131			P value summary	*		P value summary	*
	-8.23412	-7.02939	-9.29041	Std. Error of Mean	0.6532			Significantly different (P < 0.05)?	Yes		Significantly different (P < 0.05)?	Yes
								One- or two-tailed P value?	Two-tailed		One- or two-tailed P value?	Two-tailed
								t, df	t=4.395, df=4		t, df	t=2.788, df=4
	atg-13; uaDf5 heteroplasmy shift:
								How big is the difference?			How big is the difference?
	exp1	exp2	exp3					Mean of column A	-4.563		Mean of column A	-4.563
	-7.96789	-9.53568	-8.00689					Mean of column B	-8.185		Mean of column C	-7.414
	-4.97817	-9.25777	-5.13681					Difference between means (B - A) ± SEM	-3.622 ± 0.8240		Difference between means (C - A) ± SEM	-2.851 ± 1.022
	-4.35575	-7.68143	-9.80296					95% confidence interval	-5.910 to -1.334		95% confidence interval	-5.689 to -0.01197
				Descriptive statistics:				R squared (eta squared)	0.8284		R squared (eta squared)	0.6603
				Mean	-7.414
	Mean 1:	Mean 2:	Mean 3:	Std. Deviation	1.542			F test to compare variances			F test to compare variances
	-5.76727	-8.82496	-7.64889	Std. Error of Mean	0.8905			F, DFn, Dfd	1.690, 2, 2		F, DFn, Dfd	3.142, 2, 2
								P value	0.7434		P value	0.4829
								P value summary	ns		P value summary	ns
	**uaDf5 heteroplasmy shifts**:							Significantly different (P < 0.05)?	No		Significantly different (P < 0.05)?	No
		EMB PGCs
	exp1	exp2	exp3					Data analyzed			Data analyzed
	-5.87771	-4.96139	-4.42575					Sample size, column A	3		Sample size, column A	3
	-3.72183	-3.24193	-5.74569					Sample size, column B	3		Sample size, column C	3
	-5.72492	-2.47512	-4.89288
				Descriptive statistics:
				Mean	-4.563
	Mean 1:	Mean 2:	Mean 3:	Std. Deviation	0.8702
	-5.10816	-3.55948	-5.02144	Std. Error of Mean	0.5024
	**Data from Fig 4**

## Sheet: mito acidification in PGCs
	WT embs with acidified PGC mitos:
		2021-10-14		2021-12-01		2021-12-21				Fisher's exact test WT vs uaDf5
		Yes	No	Yes	No	Yes	No
		22	22	10	6	12	11			P value and statistical significance
		total:		total:		total:				Test	Fisher's exact test
		44		16		23				P value	0.542
		% yes:		% yes:		% yes:				P value summary	ns
		0.5		0.625		0.521739				One- or two-sided	Two-sided
										Statistically significant (P < 0.05)?	No
										Data analyzed	Acidified region	No acidified region	Total
		Combined yes:	combined no:	Total:						WT	44	39	83
		44	39	83						uaDf5	54	38	92
										Total	98	77	175
	% embs with acidified mitos:	0.53012
										Percentage of row total	Acidified region	No acidified region
										WT	53.01%	46.99%
										uaDf5	58.70%	41.30%
	uaDf5 embs with acidified PGC mitos:
		2021-10-14		2021-12-01		2021-12-21				Percentage of column total	Acidified region	No acidified region
		Yes	No	Yes	No	Yes	No			WT	44.90%	50.65%
		22	12	15	11	17	15			uaDf5	55.10%	49.35%
		total:		total:		total:
		34		26		32				Percentage of grand total	Acidified region	No acidified region
		% yes:		% yes:		% yes:				WT	25.14%	22.29%
		0.647059		0.576923		0.53125				uaDf5	30.86%	21.71%
		Combined yes:	combined no:	Total:						Fisher's exact test uaDf5 vs atg-18; uaDf5
		54	38	92
										P value and statistical significance
	% embs with acidified mitos:	0.586957								Test	Fisher's exact test
										P value	<0.0001
										P value summary	****
										One- or two-sided	Two-sided
	atg-18; uaDf5 embs with acidified PGC mitos:									Statistically significant (P < 0.05)?	Yes
		2021-10-14		2021-12-01		2021-12-21
		Yes	No	Yes	No	Yes	No			Data analyzed	Acidified region	No acidified region	Total
		0	21	0	24	0	21			uaDf5	54	38	92
		total:		total:		total:				ATG-18;uaDf5	0	66	66
		21		24		21				Total	54	104	158
		% yes:		% yes:		% yes:
		0		0		0				Percentage of row total	Acidified region	No acidified region
										uaDf5	58.70%	41.30%
										ATG-18;uaDf5	0.00%	100.00%
		Combined yes:	combined no:	Total:						Percentage of column total	Acidified region	No acidified region
		0	66	66						uaDf5	100.00%	36.54%
										ATG-18;uaDf5	0.00%	63.46%
	% embs with acidified mitos:	0
										Percentage of grand total	Acidified region	No acidified region
										uaDf5	34.18%	24.05%
										ATG-18;uaDf5	0.00%	41.77%
										Fisher's exact test WT vs atg-18; uaDf5
										P value and statistical significance
										Test	Fisher's exact test
										P value	<0.0001
										P value summary	****
										One- or two-sided	Two-sided
										Statistically significant (P < 0.05)?	Yes
										Data analyzed	Acidified region	No acidified region	Total
										WT	44	39	83
										ATG-18;uaDf5	0	66	66
										Total	44	105	149
										Percentage of row total	Acidified region	No acidified region
										WT	53.01%	46.99%
										ATG-18;uaDf5	0.00%	100.00%
										Percentage of column total	Acidified region	No acidified region
										WT	100.00%	37.14%
										ATG-18;uaDf5	0.00%	62.86%
										Percentage of grand total	Acidified region	No acidified region
										WT	29.53%	26.17%
										ATG-18;uaDf5	0.00%	44.30%
