# Supplementary material for: Independent regulation of mitochondrial DNA quantity and quality in Caenorhabditis elegans primordial germ cells
Source: eLife. 2022 Oct 6;11:e80396. doi: 10.7554/eLife.80396 (PMC9536838; doi:10.7554/eLife.80396)
Supplement: Figure 6—source data 1. [file elife-80396-fig6-data1.xlsx]

## Sheet: PGC mtDNAs
	pdr-1; uaDf5 PGC mtDNAs:												Unpaired two-tailed t-test:					Unpaired two-tailed t-test:
		EMB PGCs				L1 PGCs
	2022-03-03	2022-03-10	2022-03-17		2022-03-04	2022-03-11	2022-03-18						Column F	pdr-1 ; uaDf5 L1				Column H	pink-1 ; uaDf5 L1
	351.628	481.429	414.737		390.909	331.852	236.19						vs.	vs.				vs.	vs.
	471.25	428.387	395.897		289.655	243.333	367.692						Column E	pdr-1 ; uaDf5 EMB				Column G	pink-1 ; uaDf5 EMB
	477.419	367.568	458.824		256.97	273.939	246.154
								Descriptive statistics:	emb	L1			Unpaired t test					Unpaired t test
								Mean	427.5	293			P value	0.0002				P value	0.045
	Mean 1:	Mean 2:	Mean 3:		Mean 1:	Mean 2:	Mean 3:	Std. Deviation	5.338	16.93			P value summary	***				P value summary	*
	433.432	425.794	423.153		312.511	283.042	283.346	Std. Error of Mean	3.082	9.773			Significantly different (P < 0.05)?	Yes				Significantly different (P < 0.05)?	Yes
													One- or two-tailed P value?	Two-tailed				One- or two-tailed P value?	Two-tailed
													t, df	t=13.12, df=4				t, df	t=2.879, df=4
	pink-1; uaDf5 PGC mtDNAs:
		EMB PGCs				L1 PGCs							How big is the difference?					How big is the difference?
	2022-02-10	2022-02-17	2022-02-24		2022-02-11	2022-02-18	2022-02-25						Mean of column E	427.5				Mean of column G	477.5
	414.286	552.941	410.526		345.333	277.714	378.824						Mean of column F	293				Mean of column H	354.8
	614.286	413.636	601.538		452.308	228.293	423.256						Difference between means (F - E) ± SEM	-134.5 ± 10.25				Difference between means (H - G) ± SEM	-122.6 ± 42.59
	393.488	450.732	445.714		288.286	328.276	471.053						95% confidence interval	-162.9 to -106.0				95% confidence interval	-240.9 to -4.388
								Descriptive statistics:	emb	L1			R squared (eta squared)	0.9773				R squared (eta squared)	0.6746
								Mean	477.5	354.8
	Mean 1:	Mean 2:	Mean 3:		Mean 1:	Mean 2:	Mean 3:	Std. Deviation	7.374	73.4			F test to compare variances					F test to compare variances
	474.02	472.436	485.926		361.976	278.094	424.377	Std. Error of Mean	4.257	42.38			F, DFn, Dfd	10.05, 2, 2				F, DFn, Dfd	99.09, 2, 2
													P value	0.1809				P value	0.02
													P value summary	ns				P value summary	*
	pink-1; pdr-1; uaDf5 PGC mtDNAs:												Significantly different (P < 0.05)?	No				Significantly different (P < 0.05)?	Yes
		EMB PGCs				L1 PGCs
	2021-08-26	2021-08-30	2021-09-02		2021-08-27	2021-08-31	2021-09-03						Data analyzed					Data analyzed
	412.941	560	411.429		258.947	367.018	268						Sample size, column E	3				Sample size, column G	3
	376.667	598.333	364.878		225.455	395.714	282.222						Sample size, column F	3				Sample size, column H	3
	545.6	315.676	384.211		252.381	260	245.455
								Descriptive statistics:	emb	L1
								Mean	441.1	283.9
	Mean 1:	Mean 2:	Mean 3:		Mean 1:	Mean 2:	Mean 3:	Std. Deviation	52.36	50.33
	445.069	491.336	386.839		245.594	340.911	265.226	Std. Error of Mean	30.23	29.06
													Unpaired two-tailed t-test:
													Column J	pink-1 ; pdr-1; uaDf5 L1
													vs.	vs.
													Column I	pink-1 ; pdr-1; uaDf5 EMB
													Unpaired t test
													P value	0.02
													P value summary	*
													Significantly different (P < 0.05)?	Yes
													One- or two-tailed P value?	Two-tailed
													t, df	t=3.748, df=4
													How big is the difference?
													Mean of column I	441.1
													Mean of column J	283.9
													Difference between means (J - I) ± SEM	-157.2 ± 41.93
													95% confidence interval	-273.6 to -40.75
													R squared (eta squared)	0.7784
													F test to compare variances
													F, DFn, Dfd	1.082, 2, 2
													P value	0.9604
													P value summary	ns
													Significantly different (P < 0.05)?	No
													Data analyzed
													Sample size, column I	3
													Sample size, column J	3

## Sheet: proportion mtDNAs inherited
	**uaDf5 proportion mtDNAs**:								Unpaired two-tailed t-test:					Unpaired two-tailed t-test:
		EMB PGCs
	exp1	exp2	exp3						Column C	pdr-1; uadf5				Column D	pink-1; uadf5
	0.512334	0.375007	0.372068						vs.	vs.				vs.	vs.
	0.39964	0.593613	0.698357						Column A	uadf5				Column A	uadf5
	0.494048	0.374934	0.54844
					Descriptive statistics:				Unpaired t test					Unpaired t test
					Mean	0.4854			P value	0.0053				P value	0.0433
	Mean 1:	Mean 2:	Mean 3:		Std. Deviation	0.1153			P value summary	**				P value summary	*
	0.468674	0.447851	0.539622		Std. Error of Mean	0.03845			Significantly different (P < 0.05)?	Yes				Significantly different (P < 0.05)?	Yes
	**Data from figure 4**								One- or two-tailed P value?	Two-tailed				One- or two-tailed P value?	Two-tailed
									t, df	t=5.496, df=4				t, df	t=2.919, df=4
	pdr-1; uaDf5 proportion mtDNAs:								How big is the difference?					How big is the difference?
		EMB PGCs							Mean of column A	0.4854				Mean of column A	0.752
	exp1	exp2	exp3						Mean of column C	0.7002				Mean of column D	0.4854
	1.11171	0.689307	0.569495						Difference between means (C - A) ± SEM	0.2148 ± 0.03909				Difference between means (D - A) ± SEM	-0.2666 ± 0.09135
	0.614653	0.568022	0.928756						95% confidence interval	0.1063 to 0.3234				95% confidence interval	-0.5203 to -0.01303
	0.538247	0.745276	0.536489						R squared (eta squared)	0.8831				R squared (eta squared)	0.6805
					Descriptive statistics:
					Mean	0.7002			F test to compare variances					F test to compare variances
	Mean 1:	Mean 2:	Mean 3:		Std. Deviation	0.04763			F, DFn, Dfd	1.020, 2, 2				F, DFn, Dfd	9.814, 2, 2
	0.754871	0.667535	0.678247		Std. Error of Mean	0.0275			P value	0.99				P value	0.1849
									P value summary	ns				P value summary	ns
									Significantly different (P < 0.05)?	No				Significantly different (P < 0.05)?	No
	pink-1; uaDf5 proportion mtDNAs:								Data analyzed					Data analyzed
		EMB PGCs							Sample size, column A	3				Sample size, column A	3
	exp1	exp2	exp3						Sample size, column C	3				Sample size, column D	3
	0.833563	0.502249	0.922775
	0.736315	0.551916	0.703622
	0.732641	0.728318	1.05685
					Descriptive statistics:
					Mean	0.752
	Mean 1:	Mean 2:	Mean 3:		Std. Deviation	0.1507
	0.767506	0.594161	0.894415		Std. Error of Mean	0.08702
									Unpaired two-tailed t-test:
									Column E	pink-1; pdr-1; uadf5
	pink-1; pdr-1; uaDf5 proportion mtDNAs:								vs.	vs.
		EMB PGCs							Column A	uadf5
	exp1	exp2	exp3
	0.627081	0.655388	0.651389						Unpaired t test
	0.598552	0.661361	0.77347						P value	0.0354
	0.462575	0.82363	0.638854						P value summary	*
					Descriptive statistics:				Significantly different (P < 0.05)?	Yes
					Mean	0.6547			One- or two-tailed P value?	Two-tailed
	Mean 1:	Mean 2:	Mean 3:		Std. Deviation	0.08066			t, df	t=3.122, df=4
	0.562736	0.71346	0.687904		Std. Error of Mean	0.04657
									How big is the difference?
									Mean of column A	0.4854
									Mean of column E	0.6547
									Difference between means (E - A) ± SEM	0.1693 ± 0.05423
									95% confidence interval	0.01876 to 0.3199
									R squared (eta squared)	0.7091
									F test to compare variances
									F, DFn, Dfd	2.811, 2, 2
									P value	0.5248
									P value summary	ns
									Significantly different (P < 0.05)?	No
									Data analyzed
									Sample size, column A	3
									Sample size, column E	3

## Sheet: PGC heteroplasmy
	% uaDf5 pdr-1; uaDf5 PGCs:												Paired two-tailed t-test:					Paired two-tailed t-test:
		EMB PGCs				L1 PGCs
	2022-03-03	2022-03-10	2022-03-17		2022-03-04	2022-03-11	2022-03-18						Column F	pdr-1 ; uaDf5 L1				Column H	pink-1 ; uaDf5 L1
	68.3735	64	66.8639		64.6507	59.0331	63.4345						vs.	vs.				vs.	vs.
	69.3939	62.4595	67.1554		63.1247	60.4474	62.9958						Column E	pdr-1 ; uaDf5 EMB				Column G	pink-1 ; uaDf5 EMB
	69.0476	65.5629	69.209		65.032	60.4559	64.5161
								Descriptive statistics:	emb	L1			Paired t test					Paired t test
								Mean	66.9	62.63			P value	0.0023				P value	0.1234
	Mean 1:	Mean 2:	Mean 3:		Mean 1:	Mean 2:	Mean 3:	Std. Deviation	2.572	2.319			P value summary	**				P value summary	ns
	68.9384	64.0075	67.7428		64.2691	59.9788	63.6488	Std. Error of Mean	1.485	1.339			Significantly different (P < 0.05)?	Yes				Significantly different (P < 0.05)?	No
													One- or two-tailed P value?	Two-tailed				One- or two-tailed P value?	Two-tailed
													t, df	t=20.95, df=2				t, df	t=2.576, df=2
	% uaDf5 pink-1; uaDf5 PGCs:												Number of pairs	3				Number of pairs	3
		EMB PGCs				L1 PGCs
	2022-02-10	2022-02-17	2022-02-24		2022-02-11	2022-02-18	2022-02-25						How big is the difference?					How big is the difference?
	69.5652	70.6633	70.4403		68.0135	70.3422	69.6185						Mean of differences (F - E)	-4.264				Mean of differences (H - G)	-0.7433
	68.4066	71.5013	70.2703		67.604	70.7881	70.8215						SD of differences	0.3525				SD of differences	0.4997
	69.2722	71.6296	70.2454		68.75	69.3669	70						SEM of differences	0.2035				SEM of differences	0.2885
								Descriptive statistics:	emb	L1			95% confidence interval	-5.140 to -3.388				95% confidence interval	-1.985 to 0.4981
								Mean	70.22	69.48			R squared (partial eta squared)	0.9955				R squared (partial eta squared)	0.7684
	Mean 1:	Mean 2:	Mean 3:		Mean 1:	Mean 2:	Mean 3:	Std. Deviation	1.095	1.174
	69.0813	71.2647	70.3186		68.1225	70.1657	70.1467	Std. Error of Mean	0.6321	0.6779			How effective was the pairing?					How effective was the pairing?
													Correlation coefficient (r)	0.995				Correlation coefficient (r)	0.9053
													P value (one tailed)	0.032				P value (one tailed)	0.1396
	% uaDf5 pink-1; pdr-1; uaDf5 PGCs:												P value summary	*				P value summary	ns
		EMB PGCs				L1 PGCs							Was the pairing significantly effective?	Yes				Was the pairing significantly effective?	No
	2021-08-26	2021-08-30	2021-09-02		2021-08-27	2021-08-31	2021-09-03
	67.9157	66.1184	66.1371		65.1721	66.8488	66.4016
	65.625	67.1567	67.9852		61.648	67.4912	66.635
	67.7852	67.1924	67.2269		64.3963	64.9326	64.5833
								Descriptive statistics:	emb	L1
								Mean	67.02	65.35
	Mean 1:	Mean 2:	Mean 3:		Mean 1:	Mean 2:	Mean 3:	Std. Deviation	0.1675	1.418
	67.1086	66.8225	67.1164		63.7388	66.4242	65.8733	Std. Error of Mean	0.09669	0.8189
													Paired two-tailed t-test:
													Column J	pink-1 ; pdr-1; uaDf5 L1
													vs.	vs.
													Column I	pink-1 ; pdr-1; uaDf5 EMB
													Paired t test
													P value	0.1994
													P value summary	ns
													Significantly different (P < 0.05)?	No
													One- or two-tailed P value?	Two-tailed
													t, df	t=1.890, df=2
													Number of pairs	3
													How big is the difference?
													Mean of differences (J - I)	-1.67
													SD of differences	1.531
													SEM of differences	0.884
													95% confidence interval	-5.474 to 2.133
													R squared (partial eta squared)	0.641
													How effective was the pairing?
													Correlation coefficient (r)	-0.6411
													P value (one tailed)	0.2785
													P value summary	ns
													Was the pairing significantly effective?	No

## Sheet: PGC heteroplasmy shift
	pdr-1; uaDf5 heteroplasmy shift:							Unpaired two-tailed t-test:					Unpaired two-tailed t-test:
	exp1	exp2	exp3					Column C	pdr-1; uadf5				Column D	pink-1; uadf5
	-3.72282	-4.96692	-3.42938					vs.	vs.				vs.	vs.
	-6.26927	-2.01214	-4.15962					Column A	uadf5				Column A	uadf5
	-4.01564	-5.10702	-4.69291
				Descriptive statistics:				Unpaired t test					Unpaired t test
				Mean	-4.264			P value	0.6105				P value	0.0027
	Mean 1:	Mean 2:	Mean 3:	Std. Deviation	0.3525			P value summary	ns				P value summary	**
	-4.66924	-4.02869	-4.09397	Std. Error of Mean	0.2035			Significantly different (P < 0.05)?	No				Significantly different (P < 0.05)?	Yes
								One- or two-tailed P value?	Two-tailed				One- or two-tailed P value?	Two-tailed
								t, df	t=0.5517, df=4				t, df	t=6.593, df=4
	pink-1; uaDf5 heteroplasmy shift:
								How big is the difference?					How big is the difference?
	exp1	exp2	exp3					Mean of column A	-4.563				Mean of column A	-4.563
	-1.55175	-0.32106	-0.821723					Mean of column C	-4.264				Mean of column D	-0.7433
	-0.802544	-0.713165	0.551259					Difference between means (C - A) ± SEM	0.2991 ± 0.5421				Difference between means (D - A) ± SEM	3.820 ± 0.5793
	-0.522237	-2.26272	-0.245399					95% confidence interval	-1.206 to 1.804				95% confidence interval	2.211 to 5.428
				Descriptive statistics:				R squared (eta squared)	0.07072				R squared (eta squared)	0.9157
				Mean	-0.7433
	Mean 1:	Mean 2:	Mean 3:	Std. Deviation	0.4997			F test to compare variances					F test to compare variances
	-0.958843	-1.09898	-0.171954	Std. Error of Mean	0.2885			F, DFn, Dfd	6.094, 2, 2				F, DFn, Dfd	3.032, 2, 2
								P value	0.2819				P value	0.496
								P value summary	ns				P value summary	ns
	pink-1; pdr-1; uaDf5 heteroplasmy shift:							Significantly different (P < 0.05)?	No				Significantly different (P < 0.05)?	No
	exp1	exp2	exp3					Data analyzed					Data analyzed
	-2.74364	0.730395	0.264453					Sample size, column A	3				Sample size, column A	3
	-3.97698	0.334467	-1.35019					Sample size, column C	3				Sample size, column D	3
	-3.38895	-2.25987	-2.64356
				Descriptive statistics:
				Mean	-1.67
	Mean 1:	Mean 2:	Mean 3:	Std. Deviation	1.531
	-3.36986	-0.398335	-1.2431	Std. Error of Mean	0.884
	**uaDf5 heteroplasmy shifts**:							Unpaired two-tailed t-test:
		EMB PGCs
	exp1	exp2	exp3					Column E	pink-1; pdr-1; uadf5
	-5.87771	-4.96139	-4.42575					vs.	vs.
	-3.72183	-3.24193	-5.74569					Column A	uadf5
	-5.72492	-2.47512	-4.89288
				Descriptive statistics:				Unpaired t test
				Mean	-4.563			P value	0.0466
	Mean 1:	Mean 2:	Mean 3:	Std. Deviation	0.8702			P value summary	*
	-5.10816	-3.55948	-5.02144	Std. Error of Mean	0.5024			Significantly different (P < 0.05)?	Yes
	**Data from Fig 4**							One- or two-tailed P value?	Two-tailed
								t, df	t=2.845, df=4
								How big is the difference?
								Mean of column A	-4.563
								Mean of column E	-1.67
								Difference between means (E - A) ± SEM	2.893 ± 1.017
								95% confidence interval	0.06951 to 5.716
								R squared (eta squared)	0.6692
								F test to compare variances
								F, DFn, Dfd	3.096, 2, 2
								P value	0.4883
								P value summary	ns
								Significantly different (P < 0.05)?	No
								Data analyzed
								Sample size, column A	3
								Sample size, column E	3
