# Supplementary material for: Independent regulation of mitochondrial DNA quantity and quality in Caenorhabditis elegans primordial germ cells
Source: eLife. 2022 Oct 6;11:e80396. doi: 10.7554/eLife.80396 (PMC9536838; doi:10.7554/eLife.80396)
Supplement: Supplementary file 2. [file elife-80396-supp2.xlsx]

## Sheet: WT 
WT Embryo PGCs							WT L1 PGCs												WT Late embryo PGCs
NDI copies	Cox4 copies	copies/cell	Average	copies / germline	Average		NDI copies	Cox4 copies	copies/cell	Average	copies / germline	Average			Ratio L1VsEMB				NDI copies	Cox4 copies	copies/cell	Average	copies / germline	Average
2020-09-24							2020-09-22												2022-07-08
29220	276	423.478		846.957			13740	222	247.568		495.135				0.584605				3100	46	269.565		539.13
28300	286	395.804	406.049	791.608	812.098		13620	280	194.571	215.561	389.143	431.123			0.491585	0.52967			2940	42	280	283.855	560	567.71
28120	282	398.865		797.73			13500	264	204.545		409.091				0.512818				3020	40	302		604
2020-09-28							2020-09-25												2022-07-14
30240	314	385.223		770.446			13380	224	238.929		477.857				0.620235				3660	57	256.842		513.684
30040	338	355.503	381.143	711.006	762.286		13480	236	228.475	242.852	456.949	485.705			0.64268	0.637139			3620	49	295.51	275.438	591.02	550.876
29800	296	402.703		805.405			13580	208	261.154		522.308				0.648503				3630	53	273.962		547.925
2020-10-02							2020-09-29												2020-07-15
28080	242	464.132		928.264			11240	206	218.252		436.505				0.470238				2492	45.6	218.596		437.193
27120	270	401.778	416.849	803.556	833.698		11140	236	188.814	203.689	377.627	407.377			0.469945	0.490184			2466	39.8	247.839	256.523	495.678	513.045
26540	276	384.638		769.275			11220	220	204		408				0.530369				2516	33.2	303.133		606.265
WT Whole embryos
NDI copies	Dilution factor	tube Average	EXP AVG		NDI copies	Dilution factor	tube Average	EXP AVG		NDI copies	Dilution factor	tube Average	EXP AVG
2021-04-13					2021-04-14					2021-04-15
2160	27000				2340	29250				2920	36500
2140	26750	26666.7			2200	27500	29083.3			2680	33500	36000
2100	26250				2440	30500				3040	38000
3420	42750				3040	38000				2440	30500
3320	41500	41583.3			3080	38500	38583.3			2540	31750	30250
3240	40500				3140	39250				2280	28500
			32500					37375					31645.8
2520	31500				3280	41000				2540	31750
2480	31000	31500			3240	40500	41666.7			2440	30500	31000
2560	32000				3480	43500				2460	30750
2460	30750				3220	40250				2440	30500
2360	29500	30250			3280	41000	40166.7			2280	28500	29333.3
2440	30500				3140	39250				2320	29000

## Sheet: WT fed 12hrs
WT mid-L1s (fed 12hrs)
2021-02-25					2021-03-03					2021-03-04
Nd-1 copies	Cox-4 copies		ploidy	GC count	Nd-1 copies	Cox-4 copies		ploidy	GC count	Nd-1 copies	Cox-4 copies		ploidy	GC count
2690	52				2752	46				3420	48
2742	52	50.6667	3.26882	4	2588	36	41.3333	2.66667	4	3180	46	48	3.09677	4
2742	48				2768	42				3354	50
Copy #/cell	copy # / germline				Copy #/cell	copy # / germline				Copy #/cell	copy # / germline
155.192	620.769				179.478	717.913				213.75	855
158.192	632.769				215.667	862.667				207.391	829.565
171.375	685.5				197.714	790.857				201.24	804.96
161.587	646.346				197.62	790.479				207.46	829.842

## Sheet: WT fed 24hrs
WT L2s (fed 24hrs)
2021-11-03					2021-11-05						2021-11-10
Nd-1 copies	Cox-4 copies			GC count	Nd-1 copies	Cox-4 copies			GC count	Nd-1 copies	Cox-4 copies					GC count
3420	48				1472	13					1758	28
3500	62			18	1438	22			18	18	1820	30				18
3340	64				1434	17					1700	22
Copy #/cell	copy # / germline				Copy #/cell	copy # / germline				Copy #/cell	copy # / germline
213.75	3847.5				339.692	6114.46					188.357	3390.43
169.355	3048.39				196.091	3529.64					182	3276
156.562	2818.12				253.059	4555.06					231.818	4172.73
179.889	3238				262.947	4733.05					200.725	3613.05

## Sheet: ∆nop-1 
∆nop-1 Embryos							∆nop-1 L1s
NDI copies	Cox4 copies	copies/cell	Average	copies / germline	Average		NDI copies	Cox4 copies	copies/cell	Average	copies / germline	Average			Ratio L1VsEMB
2021-01-21							2021-02-03
6280	72	348.889		697.778			7440	82	362.927		725.854				1.04024
6620	84	315.238	336.113	630.476	672.225		7300	82	356.098	349.008	712.195	698.016			1.12961	1.04092
6540	76	344.211		688.421			7380	90	328		656				0.952905
2021-01-25							2021-02-11
8600	100	344		688			5900	78	302.564		605.128				0.879547
8620	98	351.837	343.435	703.673	686.87		5920	92	257.391	303.223	514.783	606.446			0.731565	0.885565
7860	94	334.468		668.936			6120	70	349.714		699.429				1.04558
2021-02-08							2021-02-18
6900	76	363.158		726.316			4780	64	298.75		597.5				0.822645
6880	70	393.143	366.434	786.286	732.867		4780	76	251.579	268.999	503.158	537.997			0.639917	0.736954
6860	80	343		686			4620	72	256.667		513.333				0.748299

## Sheet: ∆nop-1  fed 12 hrs
nop-1 mid-L1s (fed 12hrs)
2022-07-13						2022-07-20						2022-07-21
Nd-1 copies	Cox-4 copies					Nd-1 copies	Cox-4 copies					Nd-1 copies	Cox-4 copies
2960	42					2600	50					2580	40
3020	30					2680	62					2720	44
2680	50					2780	54					2580	32
Copy #/cell	copy # / germline					Copy #/cell	copy # / germline					Copy #/cell	copy # / germline
211.429	930.286					156	686.4					193.5	851.4
302	1328.8					129.677	570.581					185.455	816
160.8	707.52					154.444	679.556					241.875	1064.25
224.743	988.869					146.707	645.512					206.943	910.55

## Sheet: ∆nop-1  fed 24hrs
nop-1 L2s (fed 24hrs)
2021-11-24						2021-12-02						2021-12-03
Nd-1 copies	Cox-4 copies					Nd-1 copies	Cox-4 copies					Nd-1 copies	Cox-4 copies				GC count
1860	34					734	14.2					1766	54
1728	38					620	4.6					1380	40				19
1790	26					772	11.6					1770	32
Copy #/cell	copy # / germline					Copy #/cell	copy # / germline					Copy #/cell	copy # / germline
164.118	3118.24					155.07	2946.34					98.1111	1864.11
136.421	2592					404.348	7682.61					103.5	1966.5
206.538	3924.23					199.655	3793.45					165.938	3152.81
169.026	3211.49					253.024	4807.46					122.516	2327.81

## Sheet: TFAM-GFP(xn107) 
TFAM-GFP(xn107) Embryos							TFAM-GFP(xn107) L1s
NDI copies	Cox4 copies	copies/cell	Average	copies / germline	Average		NDI copies	Cox4 copies	copies/cell	Average	copies / germline	Average		Ratio L1VsEMB
2020-11-09							2020-10-27
3800	182	83.5165		167.033			1630	128	50.9375		101.875			0.60991
3840	174	88.2759	83.496	176.552	166.992		1660	124	53.5484	53.162	107.097	106.324		0.606603	0.638469
3620	184	78.6957		157.391			1650	120	55		110			0.698895
2020-11-10							2020-10-30
3900	152	102.632		205.263			1824	138	52.8696		105.739			0.515139
3740	156	95.8974	90.5301	191.795	181.06		1714	118	58.1017	52.558	116.203	105.116		0.605873	0.586747
3580	196	73.0612		146.122			1728	148	46.7027		93.4054			0.639227
2020-11-12							2020-11-06
4820	182	105.934		211.868			1870	124	60.3226		120.645			0.569435
4880	210	92.9524	93.7399	185.905	187.48		1804	122	59.1475	57.5096	118.295	115.019		0.636321	0.616732
4940	240	82.3333		164.667			1804	136	53.0588		106.118			0.644439
TFAM-GFP(xn107) Whole embryos
NDI copies	Dilution factor	tube Average	EXP AVG		NDI copies	Dilution factor	tube Average	EXP AVG		NDI copies	Dilution factor	tube Average	EXP AVG
2021-09-18					2021-09-19					2021-09-20
584	7300				668	8350				1096	13700
632	7900	7666.67			686	8575	8275			1020	12750	13633.3
624	7800				632	7900				1156	14450
482	6025				608	7600				686	8575
446	5575	5725			586	7325	7541.67			668	8350	8466.67
446	5575				616	7700				678	8475
			7456.25					7933.33					9960.42
854	10675				834	10425				542	6775
920	11500	9650			822	10275	10241.7			538	6725	7141.67
542	6775				802	10025				634	7925
572	7150				400	5000				858	10725
558	6975	6783.33			436	5450	5675			832	10400	10600
498	6225				526	6575				854	10675

## Sheet: nop-1; atg-18
nop-1; atg-18 Embryo PGCs							nop-1; atg-18 L1 PGCs
NDI copies	Cox4 copies	copies/cell	Average	copies / germline	Average		NDI copies	Cox4 copies	copies/cell	Average	copies / germline	Average			Ratio L1VsEMB
2022-05-16							2022-05-17
7660	82	373.659		747.317			6080	50	486.4		972.8				1.30172
7440	72	413.333	403.664	826.667	807.328		5920	64	370	416.219	740	832.439			0.895161	1.04067
7420	70	424		848			6080	62	392.258		784.516				0.925137
2022-05-19							2022-05-20
6100	60	406.667		813.333			2440	17	574.118		1148.24				1.41176
5880	74	317.838	336.105	635.676	672.209		2980	34	350.588	428.235	701.176	856.471			1.10304	1.26109
5960	84	283.81		567.619			3060	34	360		720				1.26846
2022-05-23							2022-05-24
6440	66	390.303		780.606			1746	17.6	396.818		793.636				1.01669
6320	80	316	365.131	632	730.263		1798	13.6	528.824	404.547	1057.65	809.094			1.67349	1.14346
6420	66	389.091		778.182			1728	24	288		576				0.740187

## Sheet: uaDf5 
uaDf5 Embryos							uaDf5 L1s											uaDf5 Embryo Homogenate
NDI copies	Cox4 copies	copies/cell	Average	copies / germline	Average		NDI copies	Cox4 copies	copies/cell	Average	copies / germline	Average		Ratio L1 Vs EMB
																		WT mtDNA copies	uaDf5 copies	total copies	% uadf5	Average			WT mtDNA copies	uaDf5 copies	total copies	% uadf5	Average
2020-11-23							2020-11-24
																		2020-11-23							2020-11-23
8680	90	385.778		771.556			3360	68	197.647		395.294			0.512334
8780	92	381.739	415.839	763.478	831.678		3280	86	152.558	195.783	305.116	391.565		0.39964	0.468674			1842	1834	3676	0.498912				940	880	1820	0.483516			49.1214
8880	74	480		960			3320	56	237.143		474.286			0.494048				1774	1844	3618	0.509674	0.509165			930	870	1800	0.483333	0.481301		49.6504	49.5233
																		1730	1866	3596	0.51891				980	894	1874	0.477054			49.7982
2020-12-01							2020-12-02
																		2020-12-01							2020-12-01
9180	98	374.694		749.388			2740	78	140.513		281.026			0.375007
9120	122	299.016	379.042	598.033	758.083		2840	64	177.5	163.921	355	327.842		0.593613	0.447851			2100	1716	3816	0.449686				568	714	1282	0.556942			50.3314
9500	82	463.415		926.829			2780	64	173.75		347.5			0.374934				1886	1596	3482	0.458357	0.456457			594	640	1234	0.518639	0.544475		48.8498	50.0466
																		1978	1694	3672	0.461329				558	704	1262	0.557845			50.9587
2020-12-03							2020-12-04
																		2020-12-03							2020-12-03
8740	86	406.512		813.023			2420	64	151.25		302.5			0.372068
8520	100	340.8	367.743	681.6	735.487		2380	40	238	194.817	476	389.633		0.698357	0.539622			1610	1444	3054	0.472823				860	778	1638	0.474969			47.3896
8720	98	355.918		711.837			2440	50	195.2		390.4			0.54844				1620	1468	3088	0.475389	0.478035			850	714	1564	0.456522	0.474881		46.5955	47.6458
																		1640	1550	3190	0.485893				814	792	1606	0.493151			48.9522
WT mtDNA copies	uaDf5 copies	total copies	prop. uadf5	Average	% uadf5		WT mtDNA copies	uaDf5 copies	total copies	% uadf5	Average	% uadf5			Heteroplasmy shift			Percent uaDf5 inherited					uaDf5 Whole Adult homogenate (30 adults in 60ul diluted 1000X)
2020-11-23							2020-11-24																WT mtDNA copies	uaDf5 copies	total copies	prop. uadf5	Average	% uadf5
4120	3700	7820	0.473146		47.3146		1614	1142	2756	0.414369		41.4369			-5.87771			87.5774					2021-08-08
4260	3740	8000	0.4675	0.47774	46.75	47.774	1618	1222	2840	0.430282	0.426658	43.0282	42.6658		-3.72183	-5.10816		92.0389	89.3313
4100	3980	8080	0.492574		49.2574		1720	1326	3046	0.435325		43.5325			-5.72492			88.3775					722	908	1630	0.557055		55.7055
																							726	834	1560	0.534615	0.54129	53.4615	54.129
2020-12-01							2020-12-02																770	876	1646	0.532199		53.2199
4320	4100	8420	0.486936		48.6936		1580	1228	2808	0.437322		43.7322			-4.96139			89.811					2021-08-15
4560	4100	8660	0.473441	0.47773	47.3441	47.773	1488	1174	2662	0.441022	0.442135	44.1022	44.2135		-3.24193	-3.55948		93.1524	92.5762
4460	4000	8460	0.472813		47.2813		1424	1156	2580	0.448062		44.8062			-2.47512			94.7651					910	986	1896	0.520042		52.0042
																							854	1032	1886	0.54719	0.539041	54.719	53.9041
2020-12-03							2020-12-04																830	1014	1844	0.549892		54.9892
4360	4020	8380	0.479714		47.9714		1312	1012	2324	0.435456		43.5456			-4.42575			90.7742					2021-08-16
4300	4100	8400	0.488095	0.486866	48.8095	48.6866	1338	1012	2350	0.430638	0.436651	43.0638	43.6651		-5.74569	-5.02144		88.2283	89.6912
4220	4100	8320	0.492788		49.2788		1268	1012	2280	0.44386		44.386			-4.89288			90.071					776	940	1716	0.547786		54.7786
																							714	932	1646	0.566221	0.539413	56.6221	53.9413
																							820	834	1654	0.504232		50.4232

## Sheet: uaDf5 fed 12hrs
uaDf5 mid-L1ss (fed 12hrs)
2021-05-12					2021-05-13					2021-05-19
Nd-1 copies	Cox-4 copies			GC count	Nd-1 copies	Cox-4 copies			GC count	Nd-1 copies	Cox-4 copies			GC count
3000	64				3160	68				3380	82
2940	48			4	3120	52			4	3360	52			4
3060	66				3000	58				3380	60
Copy #/cell	copy # / germline				Copy #/cell	copy # / germline				Copy #/cell	copy # / germline
140.625	562.5				139.412	557.647				123.659	494.634
183.75	735				180	720				193.846	775.385
139.091	556.364				155.172	620.69				169	676
154.489	617.955				158.195	632.779				162.168	648.673
WT mtDNA copies	uaDf5 copies	total copies	prop. uadf5	Average	% uadf5
uaDf5 L1 fed 12 hrs 05_12_21
1622	1134	2756	0.411466		41.1466
1604	1192	2796	0.426323	0.424718	42.6323	42.4718
1612	1248	2860	0.436364		43.6364
uaDf5 L1 fed 12 hrs 05_13_21
1630	1294	2924	0.442544		44.2544
1544	1292	2836	0.455571	0.449306	45.5571	44.9306
1666	1362	3028	0.449802		44.9802
uaDf5 L1 fed 12 hrs 05_19_21
1850	1296	3146	0.411952		41.1952
2032	1230	3262	0.377069	0.391529	37.7069	39.1529
1890	1186	3076	0.385566		38.5566

[truncated: 9 more sheets: uaDf5 fed 24hrs, ∆nop-1 ; uaDf5, atg-18(gk378) ; uaDf5 , Atg-13(bp414) ; uaDf5, pink-1 ; pdr-1 ; uadf5, pink-1 ; uaDf5, pdr-1 ; uaDf5, dct-1 ; uadf5, mptDf2]
